# Supplementary material
Source: publisher site journal article supplement (https://www.spandidos-publications.com/837/downloadSupplementary)
Supplement: Supplementary file 1 [file downloadSupplementary]

## Sheet: SI_A _MDAMB468 si vs scr Nx
Table SI. Ingenuity Pathway analysis annotated list of differentially expressed genes.
Fold-change	ID	Notes	Symbol	Entrez Gene Name	Location	Type(s)	Drug(s)
2,902	A2M		A2M	alpha-2-macroglobulin	Extracellular Space	transporter
-1,321	ABHD8		ABHD8	abhydrolase domain containing 8	Cytoplasm	enzyme
-1,323	ACLY		ACLY	ATP citrate lyase	Cytoplasm	enzyme
-1,496	ACOT7		ACOT7	acyl-CoA thioesterase 7	Cytoplasm	enzyme
-1,325	ACTB		ACTB	actin, beta	Cytoplasm	other
-1,359	ACTG1		ACTG1	actin gamma 1	Cytoplasm	other
-1,562	ACTN1		ACTN1	actinin, alpha 1	Cytoplasm	transcription regulator
-1,246	ACTN4		ACTN4	actinin, alpha 4	Cytoplasm	transcription regulator
-2,722	C10orf116		ADIRF	adipogenesis regulatory factor	Nucleus	other
-3,010	AFAP1L1		AFAP1L1	actin filament associated protein 1-like 1	Other	other
-1,261	AGRN		AGRN	agrin	Plasma Membrane	other
-1,206	AHCYL1		AHCYL1	adenosylhomocysteinase-like 1	Cytoplasm	enzyme
1,535	AKR1A1		AKR1A1	aldo-keto reductase family 1, member A1 (aldehyde reductase)	Cytoplasm	enzyme
-1,411	AKR1B10		AKR1B10	aldo-keto reductase family 1, member B10 (aldose reductase)	Cytoplasm	enzyme
-2,179	AKR1C1	D	AKR1C1/AKR1C2	aldo-keto reductase family 1, member C2	Cytoplasm	enzyme
-1,245	AKR1C2	D	AKR1C1/AKR1C2	aldo-keto reductase family 1, member C2	Cytoplasm	enzyme
1,575	ALCAM		ALCAM	activated leukocyte cell adhesion molecule	Plasma Membrane	other
-3,179	ALDH1A1		ALDH1A1	aldehyde dehydrogenase 1 family, member A1	Cytoplasm	enzyme	disulfiram, chlorpropamide
1,193	ALDH1A3		ALDH1A3	aldehyde dehydrogenase 1 family, member A3	Cytoplasm	enzyme
-1,862	ALDH1B1		ALDH1B1	aldehyde dehydrogenase 1 family, member B1	Cytoplasm	enzyme
1,335	ALDH3B2		ALDH3B2	aldehyde dehydrogenase 3 family, member B2	Other	enzyme
-2,153	ALPP		ALPP	alkaline phosphatase, placental	Plasma Membrane	phosphatase
-1,923	ALPPL2		ALPPL2	alkaline phosphatase, placental-like 2	Plasma Membrane	phosphatase
-2,137	AMIGO2		AMIGO2	adhesion molecule with Ig-like domain 2	Plasma Membrane	other
-1,392	AMOTL2		AMOTL2	angiomotin like 2	Plasma Membrane	other
-4,706	ANKRD1		ANKRD1	ankyrin repeat domain 1 (cardiac muscle)	Cytoplasm	transcription regulator
-1,563	ANKRD10		ANKRD10	ankyrin repeat domain 10	Nucleus	transcription regulator
1,796	ANO1		ANO1	anoctamin 1, calcium activated chloride channel	Plasma Membrane	ion channel	crofelemer
-1,531	ANXA1		ANXA1	annexin A1	Plasma Membrane	enzyme	hydrocortisone, hydrocortisone/prednisone, hydrocortisone/mitoxantrone
-1,254	ANXA2		ANXA2	annexin A2	Plasma Membrane	other
-3,002	ANXA3		ANXA3	annexin A3	Cytoplasm	enzyme
-1,734	ANXA8L1	D	ANXA8/ANXA8L1	annexin A8-like 1	Plasma Membrane	other
-1,698	ANXA8L2	D	ANXA8/ANXA8L1	annexin A8-like 1	Plasma Membrane	other
-1,373	API5		API5	apoptosis inhibitor 5	Cytoplasm	other
-1,212	APLP2		APLP2	amyloid beta (A4) precursor-like protein 2	Cytoplasm	other
-1,548	APOBEC3B		APOBEC3B	apolipoprotein B mRNA editing enzyme, catalytic polypeptide-like 3B	Cytoplasm	enzyme
-2,577	APOBEC3C		APOBEC3C	apolipoprotein B mRNA editing enzyme, catalytic polypeptide-like 3C	Other	enzyme
-1,183	ARF4		ARF4	ADP-ribosylation factor 4	Cytoplasm	enzyme
1,407	ARHGDIB		ARHGDIB	Rho GDP dissociation inhibitor (GDI) beta	Cytoplasm	other
-1,229	ARPC1B		ARPC1B	actin related protein 2/3 complex, subunit 1B, 41kDa	Cytoplasm	other
-1,110	ARPC5		ARPC5	actin related protein 2/3 complex, subunit 5, 16kDa	Cytoplasm	other
-1,380	ASS1		ASS1	argininosuccinate synthase 1	Cytoplasm	enzyme
-1,466	ATP1B1		ATP1B1	ATPase, Na+/K+ transporting, beta 1 polypeptide	Plasma Membrane	transporter
1,230	ATP1B3		ATP1B3	ATPase, Na+/K+ transporting, beta 3 polypeptide	Plasma Membrane	transporter
-1,438	ATP2A2		ATP2A2	ATPase, Ca++ transporting, cardiac muscle, slow twitch 2	Cytoplasm	transporter
-1,079	ATP5B		ATP5B	ATP synthase, H+ transporting, mitochondrial F1 complex, beta polypeptide	Cytoplasm	transporter
1,435	ATP5G2		ATP5G2	ATP synthase, H+ transporting, mitochondrial Fo complex, subunit C2 (subunit 9)	Cytoplasm	transporter
-1,875	ATP6V0D2		ATP6V0D2	ATPase, H+ transporting, lysosomal 38kDa, V0 subunit d2	Cytoplasm	transporter
1,481	ATP6V1B1		ATP6V1B1	ATPase, H+ transporting, lysosomal 56/58kDa, V1 subunit B1	Cytoplasm	transporter
1,640	ATP6V1G2-DDX39B		ATP6V1G2-DDX39B	ATP6V1G2-DDX39B readthrough (NMD candidate)	Other	other
1,599	AZGP1		AZGP1	alpha-2-glycoprotein 1, zinc-binding	Extracellular Space	transporter
1,174	B2M		B2M	beta-2-microglobulin	Plasma Membrane	transmembrane receptor
-1,351	BACE2		BACE2	beta-site APP-cleaving enzyme 2	Cytoplasm	peptidase
1,817	BARX2		BARX2	BARX homeobox 2	Nucleus	transcription regulator
-1,676	BCAM		BCAM	basal cell adhesion molecule (Lutheran blood group)	Plasma Membrane	transmembrane receptor
-4,343	BIRC3		BIRC3	baculoviral IAP repeat containing 3	Cytoplasm	enzyme
-1,741	BMP1		BMP1	bone morphogenetic protein 1	Extracellular Space	peptidase
-1,558	BPGM		BPGM	2,3-bisphosphoglycerate mutase	Extracellular Space	phosphatase
1,390	BTG1		BTG1	B-cell translocation gene 1, anti-proliferative	Nucleus	transcription regulator
-1,279	BTG3		BTG3	BTG family, member 3	Nucleus	other
1,591	BTN3A2		BTN3A2	butyrophilin, subfamily 3, member A2	Plasma Membrane	other
-1,181	BZW1		BZW1	basic leucine zipper and W2 domains 1	Cytoplasm	translation regulator
1,967	C11orf52		C11orf52	chromosome 11 open reading frame 52	Cytoplasm	other
3,532	C11orf53		C11orf53	chromosome 11 open reading frame 53	Other	other
-2,432	C12orf75		C12orf75	chromosome 12 open reading frame 75	Other	other
-1,540	C19orf33		C19orf33	chromosome 19 open reading frame 33	Nucleus	other
1,603	C1orf115		C1orf115	chromosome 1 open reading frame 115	Other	other
-2,669	C1QTNF1		C1QTNF1	C1q and tumor necrosis factor related protein 1	Extracellular Space	other
4,511	C2orf72		C2orf72	chromosome 2 open reading frame 72	Other	other
-3,148	C3		C3	complement component 3	Extracellular Space	peptidase	IgG
1,331	C6orf106		C6orf106	chromosome 6 open reading frame 106	Other	other
-2,174	C6orf15		C6orf15	chromosome 6 open reading frame 15	Extracellular Space	other
1,525	C6orf47		C6orf47	chromosome 6 open reading frame 47	Cytoplasm	other
-1,761	CALB2		CALB2	calbindin 2	Cytoplasm	other
-1,156	CALM2	D	CALM1 (includes others)	calmodulin 1 (phosphorylase kinase, delta)	Cytoplasm	other
1,333	CALM3	D	CALM1 (includes others)	calmodulin 1 (phosphorylase kinase, delta)	Cytoplasm	other
1,380	CALML5		CALML5	calmodulin-like 5	Cytoplasm	other
1,157	CALR		CALR	calreticulin	Cytoplasm	transcription regulator
-1,543	CAMK2N1		CAMK2N1	calcium/calmodulin-dependent protein kinase II inhibitor 1	Plasma Membrane	kinase
-1,292	CAP1		CAP1	CAP, adenylate cyclase-associated protein 1 (yeast)	Plasma Membrane	other
1,242	CAPN1		CAPN1	calpain 1, (mu/I) large subunit	Cytoplasm	peptidase
-1,777	CAPN2		CAPN2	calpain 2, (m/II) large subunit	Cytoplasm	peptidase
-2,641	CAPN8		CAPN8	calpain 8	Cytoplasm	peptidase
1,155	CASP14		CASP14	caspase 14, apoptosis-related cysteine peptidase	Cytoplasm	peptidase
-1,283	CAST		CAST	calpastatin	Cytoplasm	peptidase
1,270	CAT		CAT	catalase	Cytoplasm	enzyme	fomepizole
-2,117	CAV1		CAV1	caveolin 1, caveolae protein, 22kDa	Plasma Membrane	transmembrane receptor
-1,628	CBS		CBS/LOC102724560	cystathionine-beta-synthase	Cytoplasm	enzyme
-1,140	CBX3		CBX3	chromobox homolog 3	Nucleus	transcription regulator
-1,453	CCDC64		CCDC64	coiled-coil domain containing 64	Cytoplasm	other
-29,570	CCL2		CCL2	chemokine (C-C motif) ligand 2	Extracellular Space	cytokine	mimosine
-1,381	CCNC		CCNC	cyclin C	Nucleus	other
-2,261	CCND1		CCND1	cyclin D1	Nucleus	transcription regulator	arsenic trioxide/tretinoin, arsenic trioxide/daunorubicin/tretinoin, arsenic trioxide/gemtuzumab ozogamicin/tretinoin, arsenic trioxide/idarubicin/tretinoin, arsenic trioxide
-1,242	CCT2		CCT2	chaperonin containing TCP1, subunit 2 (beta)	Cytoplasm	kinase
-1,170	CCT3		CCT3	chaperonin containing TCP1, subunit 3 (gamma)	Cytoplasm	other
-1,224	CCT4		CCT4	chaperonin containing TCP1, subunit 4 (delta)	Cytoplasm	other
-1,086	CCT5		CCT5	chaperonin containing TCP1, subunit 5 (epsilon)	Cytoplasm	other
-1,215	CCT6A		CCT6A	chaperonin containing TCP1, subunit 6A (zeta 1)	Cytoplasm	other
-1,178	CCT7		CCT7	chaperonin containing TCP1, subunit 7 (eta)	Cytoplasm	other
-1,170	CCT8		CCT8	chaperonin containing TCP1, subunit 8 (theta)	Cytoplasm	enzyme
1,557	CD164		CD164	CD164 molecule, sialomucin	Plasma Membrane	other
1,557	CD164		CD164	CD164 molecule, sialomucin	Plasma Membrane	other
1,187	CD44		CD44	CD44 molecule (Indian blood group)	Plasma Membrane	enzyme
-1,279	CD63		CD63	CD63 molecule	Plasma Membrane	other
-1,950	CD70		CD70	CD70 molecule	Extracellular Space	cytokine
1,259	CD82		CD82	CD82 molecule	Plasma Membrane	other
-3,020	CDA		CDA	cytidine deaminase	Nucleus	enzyme
-1,177	CDC20		CDC20	cell division cycle 20	Nucleus	other
-1,487	CDCP1		CDCP1	CUB domain containing protein 1	Plasma Membrane	other
-1,533	CDKN1A		CDKN1A	cyclin-dependent kinase inhibitor 1A (p21, Cip1)	Nucleus	kinase
1,605	CDKN2C		CDKN2C	cyclin-dependent kinase inhibitor 2C (p18, inhibits CDK4)	Nucleus	transcription regulator
1,282	CDKN2D		CDKN2D	cyclin-dependent kinase inhibitor 2D (p19, inhibits CDK4)	Cytoplasm	transcription regulator
4,318	CEACAM6		CEACAM6	carcinoembryonic antigen-related cell adhesion molecule 6 (non-specific cross reacting antigen)	Plasma Membrane	other
-1,247	C16orf80		CFAP20	cilia and flagella associated protein 20	Cytoplasm	other
-1,008	CHCHD2		CHCHD2	coiled-coil-helix-coiled-coil-helix domain containing 2	Cytoplasm	other
-3,309	CHI3L1		CHI3L1	chitinase 3-like 1 (cartilage glycoprotein-39)	Extracellular Space	enzyme
1,424	CHMP2A		CHMP2A	charged multivesicular body protein 2A	Cytoplasm	other
1,186	CHMP4B		CHMP4B	charged multivesicular body protein 4B	Cytoplasm	other
-1,513	CISD1		CISD1	CDGSH iron sulfur domain 1	Cytoplasm	other
-1,886	CKB		CKB	creatine kinase, brain	Cytoplasm	kinase
-1,090	CKS2		CKS2	CDC28 protein kinase regulatory subunit 2	Other	kinase
-3,057	CLDN1		CLDN1	claudin 1	Plasma Membrane	other
2,409	CLDN10		CLDN10	claudin 10	Plasma Membrane	other
1,306	CLDN7		CLDN7	claudin 7	Plasma Membrane	other
2,052	CLN6		CLN6	ceroid-lipofuscinosis, neuronal 6, late infantile, variant	Cytoplasm	other
-1,082	CLTA		CLTA	clathrin, light chain A	Plasma Membrane	other
2,038	CLU		CLU	clusterin	Cytoplasm	other
-1,076	CNBP		CNBP	CCHC-type zinc finger, nucleic acid binding protein	Nucleus	transcription regulator
-1,261	CNN2		CNN2	calponin 2	Cytoplasm	other
-1,115	CNN3		CNN3	calponin 3, acidic	Cytoplasm	other
-2,675	COL4A2		COL4A2	collagen, type IV, alpha 2	Extracellular Space	other	collagenase clostridium histolyticum
2,610	C11orf93		COLCA2	colorectal cancer associated 2	Cytoplasm	other
-1,580	COTL1		COTL1	coactosin-like F-actin binding protein 1	Cytoplasm	other
1,995	COX6A1P2		COX6A1P2	cytochrome c oxidase subunit VIa polypeptide 1 pseudogene 2	Other	other
-7,898	CPA4		CPA4	carboxypeptidase A4	Extracellular Space	peptidase
2,588	CREB3L4		CREB3L4	cAMP responsive element binding protein 3-like 4	Nucleus	transcription regulator
-2,170	CRIM1		CRIM1	cysteine rich transmembrane BMP regulator 1 (chordin-like)	Extracellular Space	kinase
1,551	CRNDE		CRNDE	colorectal neoplasia differentially expressed (non-protein coding)	Other	other
2,554	CRYAB		CRYAB	crystallin, alpha B	Nucleus	other
-1,550	CSAG2	D	CSAG2/CSAG3	CSAG family, member 3	Other	other
1,825	CSAG3	D	CSAG2/CSAG3	CSAG family, member 3	Other	other
-1,518	CSRP1		CSRP1	cysteine and glycine-rich protein 1	Nucleus	other
-2,188	CST6		CST6	cystatin E/M	Extracellular Space	other
-1,446	CTSB		CTSB	cathepsin B	Cytoplasm	peptidase
1,239	CTSD		CTSD	cathepsin D	Cytoplasm	peptidase
-8,556	CXCL1		CXCL1	chemokine (C-X-C motif) ligand 1 (melanoma growth stimulating activity, alpha)	Extracellular Space	cytokine
-1,619	CXCL16		CXCL16	chemokine (C-X-C motif) ligand 16	Extracellular Space	cytokine
-9,467	IL8		CXCL8	chemokine (C-X-C motif) ligand 8	Extracellular Space	cytokine
1,688	CYP1B1		CYP1B1	cytochrome P450, family 1, subfamily B, polypeptide 1	Cytoplasm	enzyme
1,765	CYP4B1		CYP4B1	cytochrome P450, family 4, subfamily B, polypeptide 1	Cytoplasm	enzyme
1,516	CYP4X1		CYP4X1	cytochrome P450, family 4, subfamily X, polypeptide 1	Cytoplasm	enzyme
2,946	CYP4Z1		CYP4Z1	cytochrome P450, family 4, subfamily Z, polypeptide 1	Cytoplasm	enzyme
2,391	CYP4Z2P		CYP4Z2P	cytochrome P450, family 4, subfamily Z, polypeptide 2, pseudogene	Other	other
-4,106	CYP51P2		CYP51A1P2	cytochrome P450, family 51, subfamily A, polypeptide 1 pseudogene 2	Other	other
-1,525	CYR61		CYR61	cysteine-rich, angiogenic inducer, 61	Extracellular Space	other
1,189	DAP		DAP	death-associated protein	Cytoplasm	transcription regulator
-2,204	DAPL1		DAPL1	death associated protein-like 1	Other	other
1,211	DBI		DBI	diazepam binding inhibitor (GABA receptor modulator, acyl-CoA binding protein)	Cytoplasm	other
-1,859	DBN1		DBN1	drebrin 1	Cytoplasm	other
-1,239	DCTPP1		DCTPP1	dCTP pyrophosphatase 1	Cytoplasm	enzyme
1,508	DDIT4		DDIT4	DNA-damage-inducible transcript 4	Cytoplasm	other
-1,209	DDX21		DDX21	DEAD (Asp-Glu-Ala-Asp) box helicase 21	Nucleus	enzyme
-1,202	DDX39B		DDX39B	DEAD (Asp-Glu-Ala-Asp) box polypeptide 39B	Nucleus	enzyme
-2,751	DEFB1		DEFB1	defensin, beta 1	Extracellular Space	other
-1,199	DEGS1		DEGS1	delta(4)-desaturase, sphingolipid 1	Plasma Membrane	enzyme
1,137	DHCR24		DHCR24	24-dehydrocholesterol reductase	Cytoplasm	enzyme
-1,233	DHCR7		DHCR7	7-dehydrocholesterol reductase	Cytoplasm	enzyme
-7,061	DKK1		DKK1	dickkopf WNT signaling pathway inhibitor 1	Extracellular Space	growth factor
-1,254	DNAJA1		DNAJA1	DnaJ (Hsp40) homolog, subfamily A, member 1	Nucleus	other
-1,232	DPM3		DPM3	dolichyl-phosphate mannosyltransferase polypeptide 3	Cytoplasm	enzyme
-1,121	DRAP1		DRAP1	DR1-associated protein 1 (negative cofactor 2 alpha)	Nucleus	transcription regulator
1,356	DTX4		DTX4	deltex 4, E3 ubiquitin ligase	Cytoplasm	other
-1,254	DUSP12		DUSP12	dual specificity phosphatase 12	Nucleus	phosphatase
1,447	E2F1		E2F1	E2F transcription factor 1	Nucleus	transcription regulator
1,337	ECH1		ECH1	enoyl CoA hydratase 1, peroxisomal	Cytoplasm	enzyme
-1,863	ECHDC1		ECHDC1	ethylmalonyl-CoA decarboxylase 1	Cytoplasm	enzyme
-1,819	EDN1		EDN1	endothelin 1	Extracellular Space	cytokine
1,538	EDN2		EDN2	endothelin 2	Extracellular Space	growth factor
-1,991	EFEMP1		EFEMP1	EGF containing fibulin-like extracellular matrix protein 1	Extracellular Space	enzyme
-1,369	EGFR		EGFR	epidermal growth factor receptor	Plasma Membrane	kinase	cetuximab, AEE 788, panitumumab, BMS-599626, varlitinib, XL647, bevacizumab/erlotinib, afatinib, sapitinib, cetuximab/irinotecan, lapatinib/pazopanib, irinotecan/panitumumab, erlotinib/vismodegib, erlotinib/gemcitabine, lapatinib/letrozole, capecitabine/lapatinib, bevacizumab/panitumumab, bevacizumab/cetuximab, capecitabine/erlotinib, lapatinib/paclitaxel, cabozantinib/erlotinib, lapatinib/trastu…
-1,979	EGLN3		EGLN3	egl-9 family hypoxia-inducible factor 3	Cytoplasm	enzyme
-1,140	EIF3M		EIF3M	eukaryotic translation initiation factor 3, subunit M	Other	other
1,250	EIF4A1		EIF4A1	eukaryotic translation initiation factor 4A1	Cytoplasm	translation regulator
-1,419	EIF4G2		EIF4G2	eukaryotic translation initiation factor 4 gamma, 2	Cytoplasm	translation regulator
-1,104	EIF4H		EIF4H	eukaryotic translation initiation factor 4H	Cytoplasm	translation regulator
-1,171	EIF5A		EIF5A	eukaryotic translation initiation factor 5A	Cytoplasm	translation regulator
-1,151	EIF6		EIF6	eukaryotic translation initiation factor 6	Cytoplasm	translation regulator
1,271	ELF3		ELF3	E74-like factor 3 (ets domain transcription factor, epithelial-specific )	Nucleus	transcription regulator
-1,505	ELL2		ELL2	elongation factor, RNA polymerase II, 2	Nucleus	transcription regulator
2,591	ELSPBP1		ELSPBP1	epididymal sperm binding protein 1	Other	other
1,455	EMC6		EMC6	ER membrane protein complex subunit 6	Cytoplasm	other
-1,600	ENC1		ENC1	ectodermal-neural cortex 1 (with BTB domain)	Nucleus	peptidase
-1,196	ENO1		ENO1	enolase 1, (alpha)	Cytoplasm	enzyme
-1,083	EPCAM		EPCAM	epithelial cell adhesion molecule	Plasma Membrane	other	tucotuzumab celmoleukin, catumaxomab, adecatumumab
-1,896	EPHA2		EPHA2	EPH receptor A2	Plasma Membrane	kinase	dasatinib, regorafenib, dasatinib/dexamethasone/vincristine
-2,150	EPHB6		EPHB6	EPH receptor B6	Plasma Membrane	kinase
1,323	EPHX1		EPHX1	epoxide hydrolase 1, microsomal (xenobiotic)	Cytoplasm	peptidase
-2,754	ETS1		ETS1	v-ets avian erythroblastosis virus E26 oncogene homolog 1	Nucleus	transcription regulator
-1,992	EXT1		EXT1	exostosin glycosyltransferase 1	Cytoplasm	enzyme
-1,099	EZR		EZR	ezrin	Plasma Membrane	other
-1,360	F2RL1		F2RL1	coagulation factor II (thrombin) receptor-like 1	Plasma Membrane	G-protein coupled receptor
-1,926	F3		F3	coagulation factor III (thromboplastin, tissue factor)	Plasma Membrane	transmembrane receptor	activated recombinant human factor VII
-1,926	F3		F3	coagulation factor III (thromboplastin, tissue factor)	Plasma Membrane	transmembrane receptor	activated recombinant human factor VII
-4,199	FADS3		FADS3	fatty acid desaturase 3	Plasma Membrane	enzyme
-1,798	FAM167B		FAM167B	family with sequence similarity 167, member B	Other	other
-1,412	FAM207A		FAM207A	family with sequence similarity 207, member A	Other	other
-1,575	FAM20C		FAM20C	family with sequence similarity 20, member C	Extracellular Space	enzyme
1,931	FAM210B		FAM210B	family with sequence similarity 210, member B	Extracellular Space	other
1,401	FAM32A		FAM32A	family with sequence similarity 32, member A	Nucleus	other
2,873	FAM50B		FAM50B	family with sequence similarity 50, member B	Other	other
2,714	FAM84A		FAM84A	family with sequence similarity 84, member A	Other	other
-1,327	FAM96B		FAM96B	family with sequence similarity 96, member B	Cytoplasm	other
-1,188	FARSA		FARSA	phenylalanyl-tRNA synthetase, alpha subunit	Cytoplasm	enzyme
-1,453	FBLN1		FBLN1	fibulin 1	Extracellular Space	other
-2,243	FBXO2		FBXO2	F-box protein 2	Cytoplasm	enzyme
-2,003	FERMT2		FERMT2	fermitin family member 2	Cytoplasm	other
1,306	FGFBP1		FGFBP1	fibroblast growth factor binding protein 1	Extracellular Space	other
-1,557	FJX1		FJX1	four jointed box 1 (Drosophila)	Extracellular Space	other
-1,392	FKBP4		FKBP4	FK506 binding protein 4, 59kDa	Nucleus	enzyme
-1,795	FLNA		FLNA	filamin A, alpha	Cytoplasm	other
-2,716	FOLR1		FOLR1	folate receptor 1 (adult)	Plasma Membrane	transporter
-3,115	FOSL1		FOSL1	FOS-like antigen 1	Nucleus	transcription regulator
-1,801	FOXQ1		FOXQ1	forkhead box Q1	Nucleus	transcription regulator
-4,918	FSCN1		FSCN1	fascin actin-bundling protein 1	Cytoplasm	other
-1,312	FTSJ1		FTSJ1	FtsJ RNA methyltransferase homolog 1 (E. coli)	Other	enzyme
1,406	FXYD3		FXYD3	FXYD domain containing ion transport regulator 3	Plasma Membrane	other
-1,219	FXYD5		FXYD5	FXYD domain containing ion transport regulator 5	Plasma Membrane	ion channel
1,535	G3BP2		G3BP2	GTPase activating protein (SH3 domain) binding protein 2	Cytoplasm	enzyme
2,362	GABARAP		GABARAP	GABA(A) receptor-associated protein	Cytoplasm	transporter
-1,896	GABARAPL1		GABARAPL1	GABA(A) receptor-associated protein like 1	Cytoplasm	other
-1,713	GADD45A		GADD45A	growth arrest and DNA-damage-inducible, alpha	Nucleus	other
1,838	GADD45G		GADD45G	growth arrest and DNA-damage-inducible, gamma	Nucleus	other
1,533	GANAB		GANAB	glucosidase, alpha; neutral AB	Cytoplasm	enzyme	miglitol
-1,105	GAPDH		GAPDH	glyceraldehyde-3-phosphate dehydrogenase	Cytoplasm	enzyme
-2,519	GAS6		GAS6	growth arrest-specific 6	Extracellular Space	growth factor
1,545	GBA		GBA	glucosidase, beta, acid	Cytoplasm	enzyme
-1,184	GBAS		GBAS	glioblastoma amplified sequence	Plasma Membrane	other
-4,635	GFPT2		GFPT2	glutamine-fructose-6-phosphate transaminase 2	Cytoplasm	enzyme
-2,465	GGT5		GGT5	gamma-glutamyltransferase 5	Plasma Membrane	enzyme
1,467	GGT6		GGT6	gamma-glutamyltransferase 6	Plasma Membrane	peptidase
-1,149	GLO1		GLO1	glyoxalase I	Cytoplasm	enzyme
1,594	GLTP		GLTP	glycolipid transfer protein	Cytoplasm	transporter
-1,225	GLUD1		GLUD1	glutamate dehydrogenase 1	Cytoplasm	enzyme
1,298	GLUL		GLUL	glutamate-ammonia ligase	Cytoplasm	enzyme
3,088	GLYATL2		GLYATL2	glycine-N-acyltransferase-like 2	Other	other
-1,142	GNB2L1		GNB2L1	guanine nucleotide binding protein (G protein), beta polypeptide 2-like 1	Cytoplasm	enzyme
-1,932	GNG10		GNG10	guanine nucleotide binding protein (G protein), gamma 10	Plasma Membrane	enzyme
-1,485	GOPC		GOPC	golgi-associated PDZ and coiled-coil motif containing	Cytoplasm	transporter
1,516	GPAA1		GPAA1	glycosylphosphatidylinositol anchor attachment 1	Cytoplasm	enzyme
-2,219	GPC4		GPC4	glypican 4	Plasma Membrane	transmembrane receptor
-1,282	GPR56		GPR56	G protein-coupled receptor 56	Plasma Membrane	G-protein coupled receptor
1,232	GPX4		GPX4	glutathione peroxidase 4	Cytoplasm	enzyme
1,202	GTF3C6		GTF3C6	general transcription factor IIIC, polypeptide 6, alpha 35kDa	Nucleus	transcription regulator
1,467	H1F0		H1F0	H1 histone family, member 0	Nucleus	other
-1,119	H3F3B	D	H3F3A/H3F3B	H3 histone, family 3A	Nucleus	other
1,234	H3F3A	D	H3F3A/H3F3B	H3 histone, family 3A	Nucleus	other
-2,561	PTPLA		HACD1	3-hydroxyacyl-CoA dehydratase 1	Cytoplasm	other
-1,384	PTPLB		HACD2	3-hydroxyacyl-CoA dehydratase 2	Cytoplasm	phosphatase
1,778	HAUS4		HAUS4	HAUS augmin-like complex, subunit 4	Cytoplasm	other
-1,295	HCCS		HCCS	holocytochrome c synthase	Cytoplasm	enzyme
1,922	HDAC5		HDAC5	histone deacetylase 5	Nucleus	transcription regulator	tributyrin, belinostat, pyroxamide, romidepsin
-3,537	HEG1		HEG1	heart development protein with EGF-like domains 1	Plasma Membrane	other
-5,505	HES2		HES2	hes family bHLH transcription factor 2	Nucleus	other
-1,400	HES6		HES6	hes family bHLH transcription factor 6	Nucleus	transcription regulator
1,592	HHLA3		HHLA3	HERV-H LTR-associating 3	Other	other
1,375	HIBADH		HIBADH	3-hydroxyisobutyrate dehydrogenase	Cytoplasm	enzyme
-1,406	HIF1A		HIF1A	hypoxia inducible factor 1, alpha subunit (basic helix-loop-helix transcription factor)	Nucleus	transcription regulator
1,701	HIST1H1C		HIST1H1C	histone cluster 1, H1c	Nucleus	other
1,625	HIST1H2AC		HIST1H2AC	histone cluster 1, H2ac	Nucleus	other
1,934	HIST1H2BD		HIST1H2BD	histone cluster 1, H2bd	Nucleus	other
1,415	HIST1H2BK		HIST1H2BK	histone cluster 1, H2bk	Nucleus	other
-1,134	HLA-B		HLA-B	major histocompatibility complex, class I, B	Plasma Membrane	transmembrane receptor
1,188	HMGA1		HMGA1	high mobility group AT-hook 1	Nucleus	transcription regulator
1,278	HMGN2		HMGN2	high mobility group nucleosomal binding domain 2	Nucleus	other
1,229	HMGN3		HMGN3	high mobility group nucleosomal binding domain 3	Nucleus	other
-1,273	HN1		HN1	hematological and neurological expressed 1	Nucleus	other
1,334	HNRNPH2		HNRNPH2	heterogeneous nuclear ribonucleoprotein H2 (H')	Nucleus	other
2,271	HRASLS2		HRASLS2	HRAS-like suppressor 2	Other	other
2,235	HSD17B2		HSD17B2	hydroxysteroid (17-beta) dehydrogenase 2	Cytoplasm	enzyme
-1,243	HSP90AB1		HSP90AB1	heat shock protein 90kDa alpha (cytosolic), class B member 1	Cytoplasm	enzyme	alvespimycin, retaspimycin, cisplatin
-1,342	HSPA1B	D	HSPA1A/HSPA1B	heat shock 70kDa protein 1A	Cytoplasm	enzyme
-1,312	HSPA1A	D	HSPA1A/HSPA1B	heat shock 70kDa protein 1A	Cytoplasm	enzyme
-1,199	HSPA8		HSPA8	heat shock 70kDa protein 8	Cytoplasm	enzyme
-1,610	HSPB1		HSPB1	heat shock 27kDa protein 1	Cytoplasm	other
-1,093	HSPD1		HSPD1	heat shock 60kDa protein 1 (chaperonin)	Cytoplasm	enzyme
-1,497	HSPH1		HSPH1	heat shock 105kDa/110kDa protein 1	Cytoplasm	other
-3,662	ICAM1		ICAM1	intercellular adhesion molecule 1	Plasma Membrane	transmembrane receptor
-1,400	ID1		ID1	inhibitor of DNA binding 1, dominant negative helix-loop-helix protein	Nucleus	transcription regulator
-1,192	IDH3B		IDH3B	isocitrate dehydrogenase 3 (NAD+) beta	Cytoplasm	enzyme
1,334	IER2		IER2	immediate early response 2	Cytoplasm	other
-1,112	IER5		IER5	immediate early response 5	Other	other
-2,796	IFFO2		IFFO2	intermediate filament family orphan 2	Other	other
-1,977	IFNGR1		IFNGR1	interferon gamma receptor 1	Plasma Membrane	transmembrane receptor	interferon gamma-1b
-1,902	IFNGR2		IFNGR2	interferon gamma receptor 2 (interferon gamma transducer 1)	Plasma Membrane	transmembrane receptor	interferon gamma-1b
-1,835	IGFBP3		IGFBP3	insulin-like growth factor binding protein 3	Extracellular Space	other
-2,968	IGFL1		IGFL1	IGF-like family member 1	Extracellular Space	other
-2,257	IKBKE		IKBKE	inhibitor of kappa light polypeptide gene enhancer in B-cells, kinase epsilon	Cytoplasm	kinase
-1,954	IL18		IL18	interleukin 18	Extracellular Space	cytokine
-6,162	IL22RA2		IL22RA2	interleukin 22 receptor, alpha 2	Plasma Membrane	transmembrane receptor
-1,607	IL27RA		IL27RA	interleukin 27 receptor, alpha	Plasma Membrane	transmembrane receptor
-39,007	IL32		IL32	interleukin 32	Extracellular Space	cytokine
-16,735	IL7R		IL7R	interleukin 7 receptor	Plasma Membrane	transmembrane receptor	recombinant human interleukin-7
-1,384	INHBB		INHBB	inhibin, beta B	Extracellular Space	growth factor
-1,384	INHBB		INHBB	inhibin, beta B	Extracellular Space	growth factor
1,567	INSIG1		INSIG1	insulin induced gene 1	Cytoplasm	other
1,557	IRX3		IRX3	iroquois homeobox 3	Nucleus	transcription regulator
-1,480	ISG15		ISG15	ISG15 ubiquitin-like modifier	Extracellular Space	other
-1,510	ISYNA1		ISYNA1	inositol-3-phosphate synthase 1	Cytoplasm	enzyme
-2,003	ITGA3		ITGA3	integrin, alpha 3 (antigen CD49C, alpha 3 subunit of VLA-3 receptor)	Plasma Membrane	other
-1,761	ITGAV		ITGAV	integrin, alpha V	Plasma Membrane	ion channel	abciximab, CNTO 95, cilengitide
-1,296	ITGB1		ITGB1	integrin, beta 1 (fibronectin receptor, beta polypeptide, antigen CD29 includes MDF2, MSK12)	Plasma Membrane	transmembrane receptor
-1,501	ITGB4		ITGB4	integrin, beta 4	Plasma Membrane	transmembrane receptor
-1,473	IVL		IVL	involucrin	Cytoplasm	other
-1,829	JAG1		JAG1	jagged 1	Extracellular Space	growth factor
1,352	KCNN4		KCNN4	potassium channel, calcium activated intermediate/small conductance subfamily N alpha, member 4	Plasma Membrane	ion channel	betamethasone/clotrimazole, clotrimazole, senicapoc
-2,004	KCTD15		KCTD15	potassium channel tetramerization domain containing 15	Other	ion channel
2,271	KIAA1324		KIAA1324	KIAA1324	Plasma Membrane	other
-1,782	KIF3C		KIF3C	kinesin family member 3C	Cytoplasm	other
-1,857	KIRREL		KIRREL	kin of IRRE like (Drosophila)	Plasma Membrane	other
-1,603	KITLG		KITLG	KIT ligand	Extracellular Space	growth factor
1,375	KLHDC3		KLHDC3	kelch domain containing 3	Cytoplasm	other
-1,423	KLHL5		KLHL5	kelch-like family member 5	Extracellular Space	other
-1,346	KLK10		KLK10	kallikrein-related peptidase 10	Extracellular Space	peptidase
1,217	KLK5		KLK5	kallikrein-related peptidase 5	Extracellular Space	peptidase
1,145	KLK6		KLK6	kallikrein-related peptidase 6	Extracellular Space	peptidase
-1,134	KPNA2		KPNA2	karyopherin alpha 2 (RAG cohort 1, importin alpha 1)	Nucleus	transporter
-1,223	KRT10		KRT10	keratin 10, type I	Cytoplasm	other
2,189	KRT14		KRT14	keratin 14, type I	Cytoplasm	other
2,503	KRT15		KRT15	keratin 15, type I	Cytoplasm	other
-1,777	KRT17		KRT17	keratin 17, type I	Cytoplasm	other
-1,197	KRT18		KRT18	keratin 18, type I	Cytoplasm	other
1,426	KRT23		KRT23	keratin 23, type I	Other	other
-8,905	KRT34		KRT34	keratin 34, type I	Cytoplasm	other
1,605	KRT4		KRT4	keratin 4, type II	Cytoplasm	other
-1,663	KRT5		KRT5	keratin 5, type II	Cytoplasm	other
-2,162	KRT6B		KRT6B	keratin 6B, type II	Cytoplasm	other
-1,087	KRT7		KRT7	keratin 7, type II	Cytoplasm	other
-15,603	KRT75		KRT75	keratin 75, type II	Cytoplasm	other
-1,255	KRT8		KRT8	keratin 8, type II	Cytoplasm	other
-1,484	KRT80		KRT80	keratin 80, type II	Cytoplasm	other
-1,361	KRT81		KRT81	keratin 81, type II	Cytoplasm	other
-1,642	KRT86		KRT86	keratin 86, type II	Cytoplasm	other
-8,703	KRTAP3-1		KRTAP3-1	keratin associated protein 3-1	Other	other
1,325	KYNU		KYNU	kynureninase	Cytoplasm	enzyme
-13,082	L1CAM		L1CAM	L1 cell adhesion molecule	Plasma Membrane	other
1,256	LAGE3		LAGE3	L antigen family, member 3	Other	other
-1,474	LAMA5		LAMA5	laminin, alpha 5	Extracellular Space	other
-2,134	LAMB1		LAMB1	laminin, beta 1	Extracellular Space	other
-5,688	LAMB3		LAMB3	laminin, beta 3	Extracellular Space	transporter
-2,647	LAMC2		LAMC2	laminin, gamma 2	Extracellular Space	other
-1,091	LANCL2		LANCL2	LanC lantibiotic synthetase component C-like 2 (bacterial)	Plasma Membrane	other
-1,155	LAPTM4B		LAPTM4B	lysosomal protein transmembrane 4 beta	Other	other
-1,378	LASP1		LASP1	LIM and SH3 protein 1	Cytoplasm	transporter
2,382	LBH		LBH	limb bud and heart development	Nucleus	transcription regulator
-1,348	LDHA		LDHA	lactate dehydrogenase A	Cytoplasm	enzyme
-1,369	LDHB		LDHB	lactate dehydrogenase B	Cytoplasm	enzyme
-1,902	LGALS1		LGALS1	lectin, galactoside-binding, soluble, 1	Extracellular Space	other
1,346	LGALS3		LGALS3	lectin, galactoside-binding, soluble, 3	Extracellular Space	other
-3,237	LIF		LIF	leukemia inhibitory factor	Extracellular Space	cytokine
-1,431	LIMA1		LIMA1	LIM domain and actin binding 1	Cytoplasm	other
-5,971	LOXL2		LOXL2	lysyl oxidase-like 2	Extracellular Space	enzyme
-1,194	LSR		LSR	lipolysis stimulated lipoprotein receptor	Nucleus	transcription regulator
-1,498	LYAR		LYAR	Ly1 antibody reactive	Plasma Membrane	other
1,644	LYNX1		LYNX1	Ly6/neurotoxin 1	Plasma Membrane	transporter
-1,682	LYPD6B		LYPD6B	LY6/PLAUR domain containing 6B	Other	other
-1,181	MAGOH		MAGOH	mago-nashi homolog, proliferation-associated (Drosophila)	Nucleus	other
-9,815	MAL		MAL	mal, T-cell differentiation protein	Plasma Membrane	transporter
1,433	MAPK13		MAPK13	mitogen-activated protein kinase 13	Cytoplasm	kinase	talmapimod
-1,198	MARCKS		MARCKS	myristoylated alanine-rich protein kinase C substrate	Plasma Membrane	other
-26,113	MB		MB	myoglobin	Cytoplasm	transporter
-1,423	MBNL2		MBNL2	muscleblind-like splicing regulator 2	Other	other
-1,504	MCFD2		MCFD2	multiple coagulation factor deficiency 2	Cytoplasm	other
2,202	METTL7A		METTL7A	methyltransferase like 7A	Cytoplasm	other
-1,690	MICA		MICA	MHC class I polypeptide-related sequence A	Plasma Membrane	other
-1,828	MICB		MICB	MHC class I polypeptide-related sequence B	Plasma Membrane	transmembrane receptor
-3,758	MINOS1		MINOS1	mitochondrial inner membrane organizing system 1	Cytoplasm	other
-1,378	MIR205HG		MIR205HG	MIR205 host gene (non-protein coding)	Other	other
1,431	MIR3654		MIR3654	microRNA 3654	Cytoplasm	microRNA
-1,138	MMADHC		MMADHC	methylmalonic aciduria (cobalamin deficiency) cblD type, with homocystinuria	Cytoplasm	other
-2,692	MMP7		MMP7	matrix metallopeptidase 7 (matrilysin, uterine)	Extracellular Space	peptidase	marimastat
-3,886	MRPL12		MRPL12	mitochondrial ribosomal protein L12	Cytoplasm	other
-1,179	MRPL33		MRPL33	mitochondrial ribosomal protein L33	Cytoplasm	other
-1,135	MRPL9		MRPL9	mitochondrial ribosomal protein L9	Cytoplasm	translation regulator
-1,218	MRPS24		MRPS24	mitochondrial ribosomal protein S24	Cytoplasm	other
-1,398	MSN		MSN	moesin	Plasma Membrane	other
1,247	MT-ATP8		MT-ATP8	ATP synthase F0 subunit 8	Cytoplasm	enzyme
1,173	MT-CO1		MT-CO1	cytochrome c oxidase subunit I	Cytoplasm	enzyme
1,354	MT-CYB		MT-CYB	cytochrome b	Cytoplasm	enzyme	atovaquone, atovaquone/proguanil
1,147	MT-ND1		MT-ND1	NADH dehydrogenase, subunit 1 (complex I)	Cytoplasm	enzyme
1,336	MT-ND2		MT-ND2	MTND2	Cytoplasm	enzyme
1,227	MT-ND3		MT-ND3	NADH dehydrogenase, subunit 3 (complex I)	Cytoplasm	enzyme
1,201	MT-ND4		MT-ND4	NADH dehydrogenase, subunit 4 (complex I)	Cytoplasm	enzyme
1,119	MT-ND4L		MT-ND4L	NADH dehydrogenase, subunit 4L (complex I)	Cytoplasm	enzyme
1,246	MT-ND5		MT-ND5	NADH dehydrogenase, subunit 5 (complex I)	Cytoplasm	enzyme
1,383	MT-ND6		MT-ND6	NADH dehydrogenase, subunit 6 (complex I)	Cytoplasm	enzyme
1,405	MT2A		MT2A	metallothionein 2A	Cytoplasm	other
1,420	MUC1		MUC1	mucin 1, cell surface associated	Plasma Membrane	transmembrane receptor	HuHMFG1
16,261	MUCL1		MUCL1	mucin-like 1	Cytoplasm	other
-1,784	MYEOV		MYEOV	myeloma overexpressed	Nucleus	other
-1,280	MYH9		MYH9	myosin, heavy chain 9, non-muscle	Cytoplasm	enzyme
-1,358	MYL12A		MYL12A	myosin, light chain 12A, regulatory, non-sarcomeric	Cytoplasm	other
-1,967	MYO1B		MYO1B	myosin IB	Cytoplasm	other
-1,360	MYOF		MYOF	myoferlin	Nucleus	other
-1,162	NCL		NCL	nucleolin	Nucleus	other
-1,162	NCL		NCL	nucleolin	Nucleus	other
-1,260	NCOA4		NCOA4	nuclear receptor coactivator 4	Nucleus	transcription regulator
-2,442	NCOA7		NCOA7	nuclear receptor coactivator 7	Nucleus	transcription regulator
-3,714	NEDD9		NEDD9	neural precursor cell expressed, developmentally down-regulated 9	Nucleus	other
1,306	NENF		NENF	neudesin neurotrophic factor	Extracellular Space	growth factor
-2,496	NEURL3		NEURL3	neuralized E3 ubiquitin protein ligase 3	Other	other
-1,580	NFE2L3		NFE2L3	nuclear factor, erythroid 2-like 3	Nucleus	transcription regulator
-1,852	NFKBIA		NFKBIA	nuclear factor of kappa light polypeptide gene enhancer in B-cells inhibitor, alpha	Cytoplasm	transcription regulator
-1,479	NFKBIE		NFKBIE	nuclear factor of kappa light polypeptide gene enhancer in B-cells inhibitor, epsilon	Nucleus	transcription regulator
1,724	NFKBIZ		NFKBIZ	nuclear factor of kappa light polypeptide gene enhancer in B-cells inhibitor, zeta	Nucleus	transcription regulator
-1,308	NOB1		NOB1	NIN1/RPN12 binding protein 1 homolog (S. cerevisiae)	Nucleus	other
-1,334	NOTCH3		NOTCH3	notch 3	Plasma Membrane	transcription regulator
-1,184	NPM1		NPM1	nucleophosmin (nucleolar phosphoprotein B23, numatrin)	Nucleus	transcription regulator
1,463	NQO1		NQO1	NAD(P)H dehydrogenase, quinone 1	Cytoplasm	enzyme
1,360	NUPR1		NUPR1	nuclear protein, transcriptional regulator, 1	Nucleus	transcription regulator
1,412	NUPR1L		NUPR1L	nuclear protein, transcriptional regulator, 1-like	Other	other
-1,078	OAZ1		OAZ1	ornithine decarboxylase antizyme 1	Cytoplasm	enzyme
1,691	OBP2B		OBP2B	odorant binding protein 2B	Extracellular Space	transporter
-1,349	OLA1		OLA1	Obg-like ATPase 1	Cytoplasm	other
-2,407	OLFML3		OLFML3	olfactomedin-like 3	Extracellular Space	other
-4,477	OLR1		OLR1	oxidized low density lipoprotein (lectin-like) receptor 1	Plasma Membrane	transmembrane receptor
-1,556	OPTN		OPTN	optineurin	Cytoplasm	other
1,260	OST4		OST4	oligosaccharyltransferase 4 homolog (S. cerevisiae)	Other	other
-2,680	LEPREL1		P3H2	prolyl 3-hydroxylase 2	Cytoplasm	enzyme
1,232	P4HB		P4HB	prolyl 4-hydroxylase, beta polypeptide	Cytoplasm	enzyme
1,313	PADI2		PADI2	peptidyl arginine deiminase, type II	Cytoplasm	enzyme
-1,250	PAK1IP1		PAK1IP1	PAK1 interacting protein 1	Nucleus	other
-1,069	PCBP1		PCBP1	poly(rC) binding protein 1	Nucleus	translation regulator
1,142	PCNA		PCNA	proliferating cell nuclear antigen	Nucleus	enzyme
1,443	PDCD4		PDCD4	programmed cell death 4 (neoplastic transformation inhibitor)	Nucleus	other
-1,515	PDGFB		PDGFB	platelet-derived growth factor beta polypeptide	Extracellular Space	growth factor
-2,102	PDLIM1		PDLIM1	PDZ and LIM domain 1	Cytoplasm	transcription regulator
-1,595	PDLIM7		PDLIM7	PDZ and LIM domain 7 (enigma)	Cytoplasm	other
-1,716	PDZK1		PDZK1	PDZ domain containing 1	Plasma Membrane	transporter
-1,205	PEA15		PEA15	phosphoprotein enriched in astrocytes 15	Cytoplasm	transporter
1,761	PERP		PERP	PERP, TP53 apoptosis effector	Plasma Membrane	other
-1,152	PFDN2		PFDN2	prefoldin subunit 2	Cytoplasm	other
-1,760	PFKP		PFKP	phosphofructokinase, platelet	Cytoplasm	kinase
-1,138	PFN1		PFN1	profilin 1	Cytoplasm	other
-1,358	PHLDA2		PHLDA2	pleckstrin homology-like domain, family A, member 2	Cytoplasm	other
-1,230	PHLDA3		PHLDA3	pleckstrin homology-like domain, family A, member 3	Plasma Membrane	other
-1,788	PI3		PI3	peptidase inhibitor 3, skin-derived	Extracellular Space	other
-1,427	PICALM		PICALM	phosphatidylinositol binding clathrin assembly protein	Cytoplasm	other
-1,324	PINK1		PINK1	PTEN induced putative kinase 1	Cytoplasm	kinase
31,789	PIP		PIP	prolactin-induced protein	Extracellular Space	peptidase
1,607	PITX1		PITX1	paired-like homeodomain 1	Nucleus	transcription regulator
-1,197	PKM		PKM	pyruvate kinase, muscle	Cytoplasm	kinase
-1,411	PKN1		PKN1	protein kinase N1	Cytoplasm	kinase
1,294	PLA2G16		PLA2G16	phospholipase A2, group XVI	Nucleus	enzyme
-1,549	PLEK2		PLEK2	pleckstrin 2	Other	other
-1,553	PLEKHF1		PLEKHF1	pleckstrin homology domain containing, family F (with FYVE domain) member 1	Cytoplasm	other
-1,878	PLOD3		PLOD3	procollagen-lysine, 2-oxoglutarate 5-dioxygenase 3	Cytoplasm	enzyme
-1,146	PLS3		PLS3	plastin 3	Cytoplasm	other
1,362	PMVK		PMVK	phosphomevalonate kinase	Cytoplasm	kinase
-1,261	PNP		PNP	purine nucleoside phosphorylase	Nucleus	enzyme	forodesine, PD 141955
1,431	PNRC2		PNRC2	proline-rich nuclear receptor coactivator 2	Nucleus	other
2,043	POLD4		POLD4	polymerase (DNA-directed), delta 4, accessory subunit	Nucleus	enzyme
-1,687	POPDC3		POPDC3	popeye domain containing 3	Other	other
1,900	POU2F3		POU2F3	POU class 2 homeobox 3	Nucleus	other
-1,221	PPA1		PPA1	pyrophosphatase (inorganic) 1	Cytoplasm	enzyme
1,445	PPDPF		PPDPF	pancreatic progenitor cell differentiation and proliferation factor	Other	other
1,651	PPIAP22		PPIAP22	peptidylprolyl isomerase A (cyclophilin A) pseudogene 22	Other	enzyme
-1,750	PPME1		PPME1	protein phosphatase methylesterase 1	Other	enzyme
2,700	PPP1R1B		PPP1R1B	protein phosphatase 1, regulatory (inhibitor) subunit 1B	Cytoplasm	phosphatase
2,318	PPP1R3C		PPP1R3C	protein phosphatase 1, regulatory subunit 3C	Cytoplasm	phosphatase
1,473	PRDX4		PRDX4	peroxiredoxin 4	Cytoplasm	enzyme
-1,172	PRDX6		PRDX6	peroxiredoxin 6	Cytoplasm	enzyme
-1,601	PREP		PREP	prolyl endopeptidase	Cytoplasm	peptidase	Z 321
-1,376	PRMT1		PRMT1	protein arginine methyltransferase 1	Nucleus	enzyme
-10,192	PRR9		PRR9	proline rich 9	Other	other
-1,393	PRRG4		PRRG4	proline rich Gla (G-carboxyglutamic acid) 4 (transmembrane)	Plasma Membrane	other
1,327	PSENEN		PSENEN	presenilin enhancer gamma secretase subunit	Cytoplasm	peptidase
-1,295	PSMA2		PSMA2	proteasome (prosome, macropain) subunit, alpha type, 2	Cytoplasm	peptidase
-1,177	PSMA7		PSMA7	proteasome (prosome, macropain) subunit, alpha type, 7	Cytoplasm	peptidase
-1,123	PSMB3		PSMB3	proteasome (prosome, macropain) subunit, beta type, 3	Cytoplasm	peptidase
-1,257	PSMC4		PSMC4	proteasome (prosome, macropain) 26S subunit, ATPase, 4	Nucleus	peptidase
1,349	PSPHP1		PSPHP1	phosphoserine phosphatase pseudogene 1	Other	other
1,378	PTGES		PTGES	prostaglandin E synthase	Cytoplasm	enzyme
1,264	PTMA		PTMA	prothymosin, alpha	Nucleus	other
-1,246	PTMS		PTMS	parathymosin	Nucleus	other
-2,304	PTRF		PTRF	polymerase I and transcript release factor	Nucleus	transcription regulator
-1,169	PTTG1IP		PTTG1IP	pituitary tumor-transforming 1 interacting protein	Nucleus	other
-1,701	PXDN		PXDN	peroxidasin	Extracellular Space	enzyme
-1,887	PYCARD		PYCARD	PYD and CARD domain containing	Cytoplasm	transcription regulator
-2,273	PYCR2		PYCR2	pyrroline-5-carboxylate reductase family, member 2	Cytoplasm	enzyme
1,536	RAB13		RAB13	RAB13, member RAS oncogene family	Plasma Membrane	enzyme
-1,483	RAB31		RAB31	RAB31, member RAS oncogene family	Cytoplasm	enzyme
1,257	RAC1		RAC1	ras-related C3 botulinum toxin substrate 1 (rho family, small GTP binding protein Rac1)	Plasma Membrane	enzyme
-1,148	RAN		RAN	RAN, member RAS oncogene family	Nucleus	enzyme
1,906	RARRES3		RARRES3	retinoic acid receptor responder (tazarotene induced) 3	Cytoplasm	enzyme
-2,933	RBM14-RBM4		RBM14-RBM4	RBM14-RBM4 readthrough	Other	other
-1,182	RCN1		RCN1	reticulocalbin 1, EF-hand calcium binding domain	Cytoplasm	other
2,428	RDH10		RDH10	retinol dehydrogenase 10 (all-trans)	Nucleus	enzyme
1,308	REEP5		REEP5	receptor accessory protein 5	Extracellular Space	transporter
-1,878	RELB		RELB	v-rel avian reticuloendotheliosis viral oncogene homolog B	Nucleus	transcription regulator
3,783	RGS2		RGS2	regulator of G-protein signaling 2	Nucleus	other
1,726	RHBDL2		RHBDL2	rhomboid, veinlet-like 2 (Drosophila)	Plasma Membrane	peptidase
-1,086	RHOA		RHOA	ras homolog family member A	Cytoplasm	enzyme
-1,259	RIPK4		RIPK4	receptor-interacting serine-threonine kinase 4	Nucleus	kinase
-1,425	RNF38		RNF38	ring finger protein 38	Nucleus	enzyme
-2,157	RPA1		RPA1	replication protein A1, 70kDa	Nucleus	other
-2,157	RPA1		RPA1	replication protein A1, 70kDa	Nucleus	other
1,143	RPL13		RPL13	ribosomal protein L13	Cytoplasm	other
1,162	RPL13A		RPL13A	ribosomal protein L13a	Cytoplasm	other
-1,774	RPL15P3		RPL15P3	ribosomal protein L15 pseudogene 3	Other	other
1,185	RPL39		RPL39	ribosomal protein L39	Cytoplasm	other
1,115	RPL41		RPL41	ribosomal protein L41	Cytoplasm	other
-1,048	RPL5		RPL5	ribosomal protein L5	Cytoplasm	other
1,176	RPLP1		RPLP1	ribosomal protein, large, P1	Cytoplasm	other
1,228	RPS12		RPS12	ribosomal protein S12	Cytoplasm	other
-2,067	RPS17L	D	RPS17	ribosomal protein S17	Cytoplasm	other
1,238	RPS17	D	RPS17	ribosomal protein S17	Cytoplasm	other
1,275	RPS27		RPS27	ribosomal protein S27	Cytoplasm	other
1,350	RPS28		RPS28	ribosomal protein S28	Cytoplasm	other
-3,326	RPS3AP5		RPS3AP5	ribosomal protein S3A pseudogene 5	Other	other
1,238	RRM2		RRM2	ribonucleotide reductase M2	Nucleus	enzyme	cytarabine/fludarabine phosphate, bortezomib/cladribine/rituximab, gemcitabine/paclitaxel, cyclophosphamide/fludarabine phosphate/rituximab, cladribine/cytarabine/daunorubicin, gemcitabine/oxaliplatin, gemcitabine/vinorelbine, docetaxel/gemcitabine, docetaxel/gemcitabine/vincristine, cladribine/cytarabine/filgrastim, capecitabine/gemcitabine, gemcitabine/oxaliplatin/paclitaxel, cytarabine/filgras…
-1,369	RRP9		RRP9	ribosomal RNA processing 9, small subunit (SSU) processome component, homolog (yeast)	Nucleus	other
1,293	RTN3		RTN3	reticulon 3	Cytoplasm	other
-1,546	S100A10		S100A10	S100 calcium binding protein A10	Cytoplasm	other
1,157	S100A14		S100A14	S100 calcium binding protein A14	Cytoplasm	other
1,160	S100A16		S100A16	S100 calcium binding protein A16	Nucleus	other
-1,318	S100A4		S100A4	S100 calcium binding protein A4	Cytoplasm	other
1,876	S100A7A		S100A7A	S100 calcium binding protein A7A	Cytoplasm	other
1,629	S100A8		S100A8	S100 calcium binding protein A8	Cytoplasm	other
1,182	S100A9		S100A9	S100 calcium binding protein A9	Cytoplasm	other
-4,805	SAA2		SAA2	serum amyloid A2	Extracellular Space	other
-3,589	SAA2-SAA4		SAA2-SAA4	SAA2-SAA4 readthrough	Other	transporter
-1,221	SAT1		SAT1	spermidine/spermine N1-acetyltransferase 1	Cytoplasm	enzyme
1,661	SCARA3		SCARA3	scavenger receptor class A, member 3	Plasma Membrane	transmembrane receptor
-1,233	SCCPDH		SCCPDH	saccharopine dehydrogenase (putative)	Cytoplasm	other
1,438	SCD		SCD	stearoyl-CoA desaturase (delta-9-desaturase)	Cytoplasm	enzyme
5,871	SCGB2A2		SCGB2A2	secretoglobin, family 2A, member 2	Extracellular Space	other
1,350	SCPEP1		SCPEP1	serine carboxypeptidase 1	Cytoplasm	peptidase
1,603	SDC4		SDC4	syndecan 4	Plasma Membrane	other
-1,566	SDCBP2		SDCBP2	syndecan binding protein (syntenin) 2	Cytoplasm	other
-1,007	SEC61G		SEC61G	Sec61 gamma subunit	Plasma Membrane	transporter
1,760	SELENBP1		SELENBP1	selenium binding protein 1	Cytoplasm	other
-8,476	SENP3-EIF4A1		SENP3-EIF4A1	SENP3-EIF4A1 readthrough (NMD candidate)	Other	other
3,197	SEPP1		SEPP1	selenoprotein P, plasma, 1	Extracellular Space	other
-4,684	SERPINA1		SERPINA1	serpin peptidase inhibitor, clade A (alpha-1 antiproteinase, antitrypsin), member 1	Extracellular Space	other
-2,603	SERPINA3		SERPINA3	serpin peptidase inhibitor, clade A (alpha-1 antiproteinase, antitrypsin), member 3	Extracellular Space	other
-7,759	SERPINB3		SERPINB3	serpin peptidase inhibitor, clade B (ovalbumin), member 3	Cytoplasm	other
-9,068	SERPINB4		SERPINB4	serpin peptidase inhibitor, clade B (ovalbumin), member 4	Cytoplasm	other
-1,826	SERPINB7		SERPINB7	serpin peptidase inhibitor, clade B (ovalbumin), member 7	Cytoplasm	other
-1,100	SET		SET	SET nuclear proto-oncogene	Nucleus	phosphatase
-2,393	SFTA1P		SFTA1P	surfactant associated 1, pseudogene	Other	other
1,545	SKA2		SKA2	spindle and kinetochore associated complex subunit 2	Nucleus	other
1,493	SLC12A2		SLC12A2	solute carrier family 12 (sodium/potassium/chloride transporter), member 2	Plasma Membrane	transporter	bumetanide, quinethazone
-2,812	SLC1A3		SLC1A3	solute carrier family 1 (glial high affinity glutamate transporter), member 3	Plasma Membrane	transporter	riluzole
1,295	SLC1A5		SLC1A5	solute carrier family 1 (neutral amino acid transporter), member 5	Plasma Membrane	transporter
-1,414	SLC2A1		SLC2A1	solute carrier family 2 (facilitated glucose transporter), member 1	Plasma Membrane	transporter
-1,377	SLC35F2		SLC35F2	solute carrier family 35, member F2	Other	other
-1,460	SLC38A1		SLC38A1	solute carrier family 38, member 1	Plasma Membrane	transporter
-1,438	SLC38A2		SLC38A2	solute carrier family 38, member 2	Plasma Membrane	transporter
1,769	SLC39A11		SLC39A11	solute carrier family 39, member 11	Other	transporter
1,300	SLC39A7		SLC39A7	solute carrier family 39 (zinc transporter), member 7	Plasma Membrane	transporter
-1,619	SLC43A3		SLC43A3	solute carrier family 43, member 3	Extracellular Space	other
1,137	SLC44A2		SLC44A2	solute carrier family 44 (choline transporter), member 2	Extracellular Space	transporter
1,488	SLC4A11		SLC4A11	solute carrier family 4, sodium borate transporter, member 11	Plasma Membrane	transporter
-4,484	SLC6A12		SLC6A12	solute carrier family 6 (neurotransmitter transporter), member 12	Plasma Membrane	transporter	tiagabine
-3,529	SLCO4A1		SLCO4A1	solute carrier organic anion transporter family, member 4A1	Plasma Membrane	transporter
1,353	SLPI		SLPI	secretory leukocyte peptidase inhibitor	Cytoplasm	other
2,665	SLURP1		SLURP1	secreted LY6/PLAUR domain containing 1	Extracellular Space	cytokine
1,883	SMAGP		SMAGP	small cell adhesion glycoprotein	Cytoplasm	other
-1,092	SNRPB		SNRPB	small nuclear ribonucleoprotein polypeptides B and B1	Nucleus	other
1,326	SORT1		SORT1	sortilin 1	Plasma Membrane	G-protein coupled receptor
1,490	SPDEF		SPDEF	SAM pointed domain containing ETS transcription factor	Nucleus	transcription regulator
-1,547	SPIRE1		SPIRE1	spire-type actin nucleation factor 1	Cytoplasm	other
-1,906	SPRY2		SPRY2	sprouty homolog 2 (Drosophila)	Plasma Membrane	other
-1,274	SQSTM1		SQSTM1	sequestosome 1	Cytoplasm	transcription regulator
1,762	SREBF1		SREBF1	sterol regulatory element binding transcription factor 1	Nucleus	transcription regulator
1,222	SRP9		SRP9	signal recognition particle 9kDa	Cytoplasm	other
-1,144	SRSF1		SRSF1	serine/arginine-rich splicing factor 1	Nucleus	other
3,709	STAC2		STAC2	SH3 and cysteine rich domain 2	Other	other
1,519	STARD10		STARD10	StAR-related lipid transfer (START) domain containing 10	Cytoplasm	other
-1,608	STC2		STC2	stanniocalcin 2	Extracellular Space	other
-1,242	STIP1		STIP1	stress-induced phosphoprotein 1	Cytoplasm	other
1,197	STMN1		STMN1	stathmin 1	Cytoplasm	other
-1,082	STOML2		STOML2	stomatin (EPB72)-like 2	Plasma Membrane	other
-1,968	STRA6		STRA6	stimulated by retinoic acid 6	Plasma Membrane	other
-1,360	SUGT1		SUGT1	SGT1, suppressor of G2 allele of SKP1 (S. cerevisiae)	Nucleus	other
1,406	SUMF2		SUMF2	sulfatase modifying factor 2	Cytoplasm	other
1,186	SUMO2		SUMO2	small ubiquitin-like modifier 2	Nucleus	enzyme
-1,486	SUSD2		SUSD2	sushi domain containing 2	Extracellular Space	other
-3,089	SUSD3		SUSD3	sushi domain containing 3	Other	other
-1,823	SUSD4		SUSD4	sushi domain containing 4	Other	other
-2,447	SYNPO		SYNPO	synaptopodin	Cytoplasm	other
1,594	SYT12		SYT12	synaptotagmin XII	Plasma Membrane	transporter
-2,747	TAGLN		TAGLN	transgelin	Cytoplasm	other
-1,584	TAGLN2		TAGLN2	transgelin 2	Cytoplasm	other
7,020	TBATA		TBATA	thymus, brain and testes associated	Cytoplasm	other
-1,615	TBC1D2		TBC1D2	TBC1 domain family, member 2	Cytoplasm	other
-1,379	TBCB		TBCB	tubulin folding cofactor B	Other	other
1,404	TCF19		TCF19	transcription factor 19	Nucleus	transcription regulator
-1,159	TCP1		TCP1	t-complex 1	Cytoplasm	other
-2,106	TGFB2		TGFB2	transforming growth factor, beta 2	Extracellular Space	growth factor	trabedersen
-3,098	TGFBI		TGFBI	transforming growth factor, beta-induced, 68kDa	Extracellular Space	other
-4,287	THBS1		THBS1	thrombospondin 1	Extracellular Space	other
1,428	THEM6		THEM6	thioesterase superfamily member 6	Other	other
-2,098	TIMP1		TIMP1	TIMP metallopeptidase inhibitor 1	Extracellular Space	cytokine
-2,828	TIMP2		TIMP2	TIMP metallopeptidase inhibitor 2	Extracellular Space	other
-1,267	TINAGL1		TINAGL1	tubulointerstitial nephritis antigen-like 1	Extracellular Space	transporter
-1,267	TINAGL1		TINAGL1	tubulointerstitial nephritis antigen-like 1	Extracellular Space	transporter
1,840	TLE3		TLE3	transducin-like enhancer of split 3	Nucleus	other
-1,163	TLN1		TLN1	talin 1	Plasma Membrane	other
1,859	TM4SF1		TM4SF1	transmembrane 4 L six family member 1	Plasma Membrane	other
1,409	TMEM141		TMEM141	transmembrane protein 141	Other	other
-1,186	TMEM14A		TMEM14A	transmembrane protein 14A	Other	other
-1,171	TMEM14C		TMEM14C	transmembrane protein 14C	Plasma Membrane	other
-1,467	TMEM156		TMEM156	transmembrane protein 156	Other	other
-3,056	TMEM2		TMEM2	transmembrane protein 2	Cytoplasm	other
1,801	TMEM254		TMEM254	transmembrane protein 254	Other	other
1,551	TMEM256		TMEM256	transmembrane protein 256	Cytoplasm	other
1,451	TMEM54		TMEM54	transmembrane protein 54	Other	other
1,330	TMEM59		TMEM59	transmembrane protein 59	Plasma Membrane	peptidase
1,182	TMSB10		TMSB10/TMSB4X	thymosin beta 10	Cytoplasm	other
-18,245	TMSB4XP8		TMSB4XP8	thymosin beta 4, X-linked pseudogene 8	Other	other
-2,429	TMX2-CTNND1		TMX2-CTNND1	TMX2-CTNND1 readthrough (NMD candidate)	Other	other
-8,094	TNC		TNC	tenascin C	Extracellular Space	other
-9,507	TNF		TNF	tumor necrosis factor	Extracellular Space	cytokine	adalimumab, etanercept, infliximab, certolizumab, golimumab, infliximab/methotrexate, dexamethasone/thalidomide, dexamethasone/pomalidomide, cyclophosphamide/dexamethasone/thalidomide, golimumab/methotrexate, bortezomib/dexamethasone/thalidomide, rituximab/thalidomide, bortezomib/thalidomide, prednisone/thalidomide, adalimumab/methotrexate, pomalidomide, thalidomide
-2,593	TNFAIP2		TNFAIP2	tumor necrosis factor, alpha-induced protein 2	Extracellular Space	other
-3,643	TNFAIP3		TNFAIP3	tumor necrosis factor, alpha-induced protein 3	Nucleus	enzyme
-1,262	TNFRSF12A		TNFRSF12A	tumor necrosis factor receptor superfamily, member 12A	Plasma Membrane	transmembrane receptor
-2,467	TNFRSF21		TNFRSF21	tumor necrosis factor receptor superfamily, member 21	Plasma Membrane	transmembrane receptor
-1,444	TNIP1		TNIP1	TNFAIP3 interacting protein 1	Nucleus	other
-2,157	TNS3		TNS3	tensin 3	Plasma Membrane	phosphatase
-1,280	TOMM40		TOMM40	translocase of outer mitochondrial membrane 40 homolog (yeast)	Cytoplasm	ion channel
1,263	TPD52L1		TPD52L1	tumor protein D52-like 1	Cytoplasm	other
-1,196	TPI1		TPI1	triosephosphate isomerase 1	Cytoplasm	enzyme
-2,100	TPM1		TPM1	tropomyosin 1 (alpha)	Cytoplasm	other
-1,705	TPM2		TPM2	tropomyosin 2 (beta)	Other	other
2,305	TPM4		TPM4	tropomyosin 4	Cytoplasm	other
1,647	TRAPPC5		TRAPPC5	trafficking protein particle complex 5	Cytoplasm	other
1,450	TRIB3		TRIB3	tribbles pseudokinase 3	Nucleus	kinase
-1,417	TRIM16L		TRIM16L	tripartite motif containing 16-like	Other	other
-1,318	TRIM29		TRIM29	tripartite motif containing 29	Cytoplasm	transcription regulator
-1,534	TRIM47		TRIM47	tripartite motif containing 47	Cytoplasm	other
-1,266	TRIP10		TRIP10	thyroid hormone receptor interactor 10	Cytoplasm	other
-1,304	TRMT1		TRMT1	tRNA methyltransferase 1 homolog (S. cerevisiae)	Extracellular Space	enzyme
1,540	TSC22D3		TSC22D3	TSC22 domain family, member 3	Nucleus	transcription regulator
1,522	TSKU		TSKU	tsukushi, small leucine rich proteoglycan	Extracellular Space	other
-1,360	TSPAN1		TSPAN1	tetraspanin 1	Cytoplasm	transporter
1,222	TSPAN13		TSPAN13	tetraspanin 13	Plasma Membrane	other
-1,386	TSPAN15		TSPAN15	tetraspanin 15	Plasma Membrane	other
-1,384	TST		TST	thiosulfate sulfurtransferase (rhodanese)	Cytoplasm	enzyme
1,942	TSTD1		TSTD1	thiosulfate sulfurtransferase (rhodanese)-like domain containing 1	Cytoplasm	other
-1,081	TUBA1C		TUBA1C	tubulin, alpha 1c	Cytoplasm	other	epothilone B, colchicine/probenecid, larotaxel, eribulin, davunetide, vintafolide, milataxel, cevipabulin, gemcitabine/paclitaxel, docetaxel/prednisone, capecitabine/docetaxel, paclitaxel/trastuzumab, cyclophosphamide/prednisone/vincristine, docetaxel/hydrocortisone, cyclophosphamide/docetaxel, gemcitabine/vinorelbine, cyclophosphamide/daunorubicin/imatinib/prednisone/vincristine, cyclophosphamid…
-1,546	TUBB2A		TUBB2A	tubulin, beta 2A class IIa	Cytoplasm	other	epothilone B, colchicine/probenecid, larotaxel, ABT-751, eribulin, simotaxel, davunetide, vintafolide, milataxel, cevipabulin, brentuximab vedotin, cabazitaxel, gemcitabine/paclitaxel, docetaxel/prednisone, capecitabine/docetaxel, paclitaxel/trastuzumab, cyclophosphamide/prednisone/vincristine, docetaxel/hydrocortisone, cyclophosphamide/docetaxel, gemcitabine/vinorelbine, cyclophosphamide/daunoru…
-1,125	TUBB4B		TUBB4B	tubulin, beta 4B class IVb	Cytoplasm	other	epothilone B, colchicine/probenecid, larotaxel, ABT-751, eribulin, simotaxel, davunetide, vintafolide, milataxel, cevipabulin, brentuximab vedotin, cabazitaxel, gemcitabine/paclitaxel, docetaxel/prednisone, capecitabine/docetaxel, paclitaxel/trastuzumab, cyclophosphamide/prednisone/vincristine, docetaxel/hydrocortisone, cyclophosphamide/docetaxel, gemcitabine/vinorelbine, cyclophosphamide/daunoru…
-1,220	TUBB6		TUBB6	tubulin, beta 6 class V	Cytoplasm	other	brentuximab vedotin, cabazitaxel
-1,264	TXNDC5		TXNDC5	thioredoxin domain containing 5 (endoplasmic reticulum)	Cytoplasm	enzyme
-1,169	UBA2		UBA2	ubiquitin-like modifier activating enzyme 2	Cytoplasm	enzyme
-1,169	UBE2S		UBE2S	ubiquitin-conjugating enzyme E2S	Nucleus	enzyme
-1,754	UBE2V1		UBE2V1	ubiquitin-conjugating enzyme E2 variant 1	Nucleus	transcription regulator
-1,366	UCA1		UCA1	urothelial cancer associated 1 (non-protein coding)	Other	other
-2,847	UGCG		UGCG	UDP-glucose ceramide glucosyltransferase	Cytoplasm	enzyme	eliglustat, N-butyldeoxygalactonojirimycin, N-butyldeoxynojirimycin
1,183	MNF1		UQCC2	ubiquinol-cytochrome c reductase complex assembly factor 2	Cytoplasm	other
-1,222	USP14		USP14	ubiquitin specific peptidase 14 (tRNA-guanine transglycosylase)	Cytoplasm	peptidase
-1,576	VAMP3		VAMP3	vesicle-associated membrane protein 3	Plasma Membrane	other
1,191	VAMP8		VAMP8	vesicle-associated membrane protein 8	Plasma Membrane	transporter
-1,436	VCL		VCL	vinculin	Plasma Membrane	enzyme
-1,249	VDAC1		VDAC1	voltage-dependent anion channel 1	Cytoplasm	ion channel
1,744	VGLL1		VGLL1	vestigial-like family member 1	Nucleus	transcription regulator
1,649	VIPR1		VIPR1	vasoactive intestinal peptide receptor 1	Plasma Membrane	G-protein coupled receptor
1,223	VOPP1		VOPP1	vesicular, overexpressed in cancer, prosurvival protein 1	Nucleus	other
1,603	VSTM2L		VSTM2L	V-set and transmembrane domain containing 2 like	Other	other
2,115	VTCN1		VTCN1	V-set domain containing T cell activation inhibitor 1	Plasma Membrane	other
1,330	WDR34		WDR34	WD repeat domain 34	Cytoplasm	other
-1,625	WLS		WLS	wntless Wnt ligand secretion mediator	Cytoplasm	other
-2,865	WNT4		WNT4	wingless-type MMTV integration site family, member 4	Extracellular Space	cytokine
-1,281	WWC1		WWC1	WW and C2 domain containing 1	Cytoplasm	transcription regulator
2,143	XBP1		XBP1	X-box binding protein 1	Nucleus	transcription regulator
2,761	YBX2		YBX2	Y box binding protein 2	Cytoplasm	translation regulator
-1,254	YWHAG		YWHAG	tyrosine 3-monooxygenase/tryptophan 5-monooxygenase activation protein, gamma	Cytoplasm	other
-1,208	YWHAH		YWHAH	tyrosine 3-monooxygenase/tryptophan 5-monooxygenase activation protein, eta	Cytoplasm	transcription regulator
-1,125	YWHAZ		YWHAZ	tyrosine 3-monooxygenase/tryptophan 5-monooxygenase activation protein, zeta	Cytoplasm	enzyme
-2,415	ZFP36L2		ZFP36L2	ZFP36 ring finger protein-like 2	Nucleus	transcription regulator
1,275	ZWINT		ZWINT	ZW10 interacting kinetochore protein	Nucleus	other
-2,880	ZYX		ZYX	zyxin	Plasma Membrane	other
© 2000-2015 QIAGEN. All rights reserved. si, cells transfected with small interfering RNA targeting myoglobin; scr, cells transfected with scrambled control small interfering RNA; Nx, normoxia; Hx, hypoxia.

## Sheet: SI_B _MDAMB468 si vs scr Hx
© 2000-2015 QIAGEN. All rights reserved.
Fold-change	ID	Notes	Symbol	Entrez Gene Name	Location	Type(s)	Drug(s)
2,672	A2M		A2M	alpha-2-macroglobulin	Extracellular Space	transporter
2,059	AARS2		AARS2	alanyl-tRNA synthetase 2, mitochondrial	Cytoplasm	enzyme
-1,298	AATF		AATF	apoptosis antagonizing transcription factor	Nucleus	transcription regulator
-1,305	ACLY		ACLY	ATP citrate lyase	Cytoplasm	enzyme
-1,592	ACOT7		ACOT7	acyl-CoA thioesterase 7	Cytoplasm	enzyme
-1,260	ACTB		ACTB	actin, beta	Cytoplasm	other
-1,294	ACTG1		ACTG1	actin gamma 1	Cytoplasm	other
-1,349	ACTN1		ACTN1	actinin, alpha 1	Cytoplasm	transcription regulator
-1,560	ADAM9		ADAM9	ADAM metallopeptidase domain 9	Plasma Membrane	peptidase
-1,189	ADIPOR1		ADIPOR1	adiponectin receptor 1	Plasma Membrane	transmembrane receptor
-2,441	C10orf116		ADIRF	adipogenesis regulatory factor	Nucleus	other
-2,240	AFAP1L1		AFAP1L1	actin filament associated protein 1-like 1	Other	other
-2,545	AKR1B1		AKR1B1	aldo-keto reductase family 1, member B1 (aldose reductase)	Cytoplasm	enzyme	sorbinil
-1,531	AKR1B10		AKR1B10	aldo-keto reductase family 1, member B10 (aldose reductase)	Cytoplasm	enzyme
-2,976	ALDH1A1		ALDH1A1	aldehyde dehydrogenase 1 family, member A1	Cytoplasm	enzyme	disulfiram, chlorpropamide
-1,561	ALDH1B1		ALDH1B1	aldehyde dehydrogenase 1 family, member B1	Cytoplasm	enzyme
1,252	ALDH3B2		ALDH3B2	aldehyde dehydrogenase 3 family, member B2	Other	enzyme
-1,105	ALDOA		ALDOA	aldolase A, fructose-bisphosphate	Cytoplasm	enzyme
1,538	ALG12		ALG12	ALG12, alpha-1,6-mannosyltransferase	Cytoplasm	enzyme
-2,419	ALPP		ALPP	alkaline phosphatase, placental	Plasma Membrane	phosphatase
-2,454	ALPPL2		ALPPL2	alkaline phosphatase, placental-like 2	Plasma Membrane	phosphatase
-2,166	AMIGO2		AMIGO2	adhesion molecule with Ig-like domain 2	Plasma Membrane	other
-1,443	ANAPC13		ANAPC13	anaphase promoting complex subunit 13	Nucleus	other
-3,535	ANKRD1		ANKRD1	ankyrin repeat domain 1 (cardiac muscle)	Cytoplasm	transcription regulator
1,752	ANO1		ANO1	anoctamin 1, calcium activated chloride channel	Plasma Membrane	ion channel	crofelemer
-1,920	ANXA1		ANXA1	annexin A1	Plasma Membrane	enzyme	hydrocortisone, hydrocortisone/prednisone, hydrocortisone/mitoxantrone
-1,489	ANXA2		ANXA2	annexin A2	Plasma Membrane	other
-3,020	ANXA3		ANXA3	annexin A3	Cytoplasm	enzyme
-1,155	ANXA5		ANXA5	annexin A5	Plasma Membrane	other
-1,189	ANXA7		ANXA7	annexin A7	Plasma Membrane	ion channel
-1,869	ANXA8L2	D	ANXA8/ANXA8L1	annexin A8-like 1	Plasma Membrane	other
-1,529	ANXA8L1	D	ANXA8/ANXA8L1	annexin A8-like 1	Plasma Membrane	other
-1,406	AP2B1		AP2B1	adaptor-related protein complex 2, beta 1 subunit	Plasma Membrane	transporter
-1,310	API5		API5	apoptosis inhibitor 5	Cytoplasm	other
-1,284	APLP2		APLP2	amyloid beta (A4) precursor-like protein 2	Cytoplasm	other
-1,694	APOBEC3B		APOBEC3B	apolipoprotein B mRNA editing enzyme, catalytic polypeptide-like 3B	Cytoplasm	enzyme
-2,092	APOBEC3C		APOBEC3C	apolipoprotein B mRNA editing enzyme, catalytic polypeptide-like 3C	Other	enzyme
-2,470	APOBEC3D		APOBEC3D	apolipoprotein B mRNA editing enzyme, catalytic polypeptide-like 3D	Cytoplasm	other
-1,398	APOO		APOO	apolipoprotein O	Extracellular Space	other
-1,225	ARCN1		ARCN1	archain 1	Cytoplasm	other
-1,486	ARF4		ARF4	ADP-ribosylation factor 4	Cytoplasm	enzyme
2,145	ARHGAP33		ARHGAP33	Rho GTPase activating protein 33	Plasma Membrane	transporter
1,366	ARHGDIB		ARHGDIB	Rho GDP dissociation inhibitor (GDI) beta	Cytoplasm	other
1,939	ARHGEF6		ARHGEF6	Rac/Cdc42 guanine nucleotide exchange factor (GEF) 6	Cytoplasm	other
-1,652	ARL8B		ARL8B	ADP-ribosylation factor-like 8B	Plasma Membrane	enzyme
-1,192	ARPC5		ARPC5	actin related protein 2/3 complex, subunit 5, 16kDa	Cytoplasm	other
-1,547	ASS1		ASS1	argininosuccinate synthase 1	Cytoplasm	enzyme
-1,317	ATG5		ATG5	autophagy related 5	Cytoplasm	other
-1,485	ATP1B1		ATP1B1	ATPase, Na+/K+ transporting, beta 1 polypeptide	Plasma Membrane	transporter
-1,367	ATP2A2		ATP2A2	ATPase, Ca++ transporting, cardiac muscle, slow twitch 2	Cytoplasm	transporter
-1,217	ATP5B		ATP5B	ATP synthase, H+ transporting, mitochondrial F1 complex, beta polypeptide	Cytoplasm	transporter
-1,188	ATP5C1		ATP5C1	ATP synthase, H+ transporting, mitochondrial F1 complex, gamma polypeptide 1	Cytoplasm	transporter
-2,284	ATP6V0D2		ATP6V0D2	ATPase, H+ transporting, lysosomal 38kDa, V0 subunit d2	Cytoplasm	transporter
-1,313	ATP6V0E1		ATP6V0E1	ATPase, H+ transporting, lysosomal 9kDa, V0 subunit e1	Cytoplasm	transporter
1,476	ATP6V1B1		ATP6V1B1	ATPase, H+ transporting, lysosomal 56/58kDa, V1 subunit B1	Cytoplasm	transporter
-1,269	ATP6V1E1		ATP6V1E1	ATPase, H+ transporting, lysosomal 31kDa, V1 subunit E1	Cytoplasm	transporter
-1,428	ATXN10		ATXN10	ataxin 10	Cytoplasm	other
1,505	ATXN7L3B		ATXN7L3B	ataxin 7-like 3B	Other	other
1,621	AZGP1		AZGP1	alpha-2-glycoprotein 1, zinc-binding	Extracellular Space	transporter
-1,364	BACE2		BACE2	beta-site APP-cleaving enzyme 2	Cytoplasm	peptidase
-1,640	BAMBI		BAMBI	BMP and activin membrane-bound inhibitor	Plasma Membrane	other
-1,135	BANF1		BANF1	barrier to autointegration factor 1	Nucleus	other
1,606	BARX2		BARX2	BARX homeobox 2	Nucleus	transcription regulator
-1,578	BCAM		BCAM	basal cell adhesion molecule (Lutheran blood group)	Plasma Membrane	transmembrane receptor
-1,185	BCAS2		BCAS2	breast carcinoma amplified sequence 2	Nucleus	other
-1,476	BIRC2		BIRC2	baculoviral IAP repeat containing 2	Cytoplasm	enzyme
-3,530	BIRC3		BIRC3	baculoviral IAP repeat containing 3	Cytoplasm	enzyme
-1,573	BNIP3		BNIP3	BCL2/adenovirus E1B 19kDa interacting protein 3	Cytoplasm	other
-1,570	BPGM		BPGM	2,3-bisphosphoglycerate mutase	Extracellular Space	phosphatase
-1,179	BTF3		BTF3	basic transcription factor 3	Nucleus	transcription regulator
-1,444	BTG3		BTG3	BTG family, member 3	Nucleus	other
1,535	BTN3A2		BTN3A2	butyrophilin, subfamily 3, member A2	Plasma Membrane	other
-1,352	BZW1		BZW1	basic leucine zipper and W2 domains 1	Cytoplasm	translation regulator
-1,200	BZW2		BZW2	basic leucine zipper and W2 domains 2	Cytoplasm	translation regulator
1,874	C11orf52		C11orf52	chromosome 11 open reading frame 52	Cytoplasm	other
3,128	C11orf53		C11orf53	chromosome 11 open reading frame 53	Other	other
-2,237	C12orf75		C12orf75	chromosome 12 open reading frame 75	Other	other
-1,624	C14orf142		C14orf142	chromosome 14 open reading frame 142	Other	other
-1,277	C14orf166		C14orf166	chromosome 14 open reading frame 166	Nucleus	other
-2,000	C19orf33		C19orf33	chromosome 19 open reading frame 33	Nucleus	other
1,167	C19orf43		C19orf43	chromosome 19 open reading frame 43	Nucleus	other
1,876	C1orf115		C1orf115	chromosome 1 open reading frame 115	Other	other
-2,911	C1QTNF1		C1QTNF1	C1q and tumor necrosis factor related protein 1	Extracellular Space	other
-1,225	C20orf24		C20orf24	chromosome 20 open reading frame 24	Cytoplasm	other
3,899	C2orf72		C2orf72	chromosome 2 open reading frame 72	Other	other
-2,193	C3		C3	complement component 3	Extracellular Space	peptidase	IgG
1,334	C6orf106		C6orf106	chromosome 6 open reading frame 106	Other	other
2,854	C6orf47		C6orf47	chromosome 6 open reading frame 47	Cytoplasm	other
-1,246	C8orf33		C8orf33	chromosome 8 open reading frame 33	Other	other
1,325	C9orf142		C9orf142	chromosome 9 open reading frame 142	Cytoplasm	other
-1,387	CA9		CA9	carbonic anhydrase IX	Nucleus	enzyme	girentuximab, I 131 chimeric G250, Y 90 chimeric G250, methazolamide, hydrochlorothiazide, acetazolamide, trichloromethiazide, chlorothiazide, chlorthalidone, benzthiazide, sulfacetamide, topiramate
-1,246	CACYBP		CACYBP	calcyclin binding protein	Nucleus	other
-1,947	CALB2		CALB2	calbindin 2	Cytoplasm	other
-1,318	CALM2	D	CALM1 (includes others)	calmodulin 1 (phosphorylase kinase, delta)	Cytoplasm	other
1,319	CALM3	D	CALM1 (includes others)	calmodulin 1 (phosphorylase kinase, delta)	Cytoplasm	other
1,309	CALML5		CALML5	calmodulin-like 5	Cytoplasm	other
-1,361	CAP1		CAP1	CAP, adenylate cyclase-associated protein 1 (yeast)	Plasma Membrane	other
1,286	CAPN1		CAPN1	calpain 1, (mu/I) large subunit	Cytoplasm	peptidase
-1,666	CAPN2		CAPN2	calpain 2, (m/II) large subunit	Cytoplasm	peptidase
-1,136	CAPRIN1		CAPRIN1	cell cycle associated protein 1	Plasma Membrane	other
1,244	CASP14		CASP14	caspase 14, apoptosis-related cysteine peptidase	Cytoplasm	peptidase
1,244	CASP14		CASP14	caspase 14, apoptosis-related cysteine peptidase	Cytoplasm	peptidase
-1,394	CAST		CAST	calpastatin	Cytoplasm	peptidase
-2,038	CAV1		CAV1	caveolin 1, caveolae protein, 22kDa	Plasma Membrane	transmembrane receptor
-1,508	CAV2		CAV2	caveolin 2	Plasma Membrane	other
-1,527	CBFB		CBFB	core-binding factor, beta subunit	Nucleus	transcription regulator
-1,320	CBX3		CBX3	chromobox homolog 3	Nucleus	transcription regulator
-22,537	CCL2		CCL2	chemokine (C-C motif) ligand 2	Extracellular Space	cytokine	mimosine
-1,582	CCNC		CCNC	cyclin C	Nucleus	other
-1,872	CCND1		CCND1	cyclin D1	Nucleus	transcription regulator	arsenic trioxide/tretinoin, arsenic trioxide/daunorubicin/tretinoin, arsenic trioxide/gemtuzumab ozogamicin/tretinoin, arsenic trioxide/idarubicin/tretinoin, arsenic trioxide
-1,199	CCNI		CCNI	cyclin I	Other	other
-1,364	CCT2		CCT2	chaperonin containing TCP1, subunit 2 (beta)	Cytoplasm	kinase
-1,216	CCT3		CCT3	chaperonin containing TCP1, subunit 3 (gamma)	Cytoplasm	other
-1,308	CCT4		CCT4	chaperonin containing TCP1, subunit 4 (delta)	Cytoplasm	other
-1,209	CCT5		CCT5	chaperonin containing TCP1, subunit 5 (epsilon)	Cytoplasm	other
-1,266	CCT6A		CCT6A	chaperonin containing TCP1, subunit 6A (zeta 1)	Cytoplasm	other
-1,255	CCT7		CCT7	chaperonin containing TCP1, subunit 7 (eta)	Cytoplasm	other
-1,276	CCT8		CCT8	chaperonin containing TCP1, subunit 8 (theta)	Cytoplasm	enzyme
1,279	CD151		CD151	CD151 molecule (Raph blood group)	Plasma Membrane	other
1,446	CD164		CD164	CD164 molecule, sialomucin	Plasma Membrane	other
-1,385	CD63		CD63	CD63 molecule	Plasma Membrane	other
-1,678	CD70		CD70	CD70 molecule	Extracellular Space	cytokine
1,380	CD82		CD82	CD82 molecule	Plasma Membrane	other
-3,259	CDA		CDA	cytidine deaminase	Nucleus	enzyme
-1,276	CDC20		CDC20	cell division cycle 20	Nucleus	other
-1,514	CDH3		CDH3	cadherin 3, type 1, P-cadherin (placental)	Plasma Membrane	other
-1,631	CDKN1A		CDKN1A	cyclin-dependent kinase inhibitor 1A (p21, Cip1)	Nucleus	kinase
1,488	CDKN2C		CDKN2C	cyclin-dependent kinase inhibitor 2C (p18, inhibits CDK4)	Nucleus	transcription regulator
3,704	CEACAM6		CEACAM6	carcinoembryonic antigen-related cell adhesion molecule 6 (non-specific cross reacting antigen)	Plasma Membrane	other
-1,368	CEBPB		CEBPB	CCAAT/enhancer binding protein (C/EBP), beta	Nucleus	transcription regulator
-1,203	CERS2		CERS2	ceramide synthase 2	Nucleus	transcription regulator
-1,438	CFDP1		CFDP1	craniofacial development protein 1	Extracellular Space	other
-1,109	CFL1		CFL1	cofilin 1 (non-muscle)	Nucleus	other
-2,504	CHI3L1		CHI3L1	chitinase 3-like 1 (cartilage glycoprotein-39)	Extracellular Space	enzyme
-1,631	CHMP5		CHMP5	charged multivesicular body protein 5	Cytoplasm	other
-1,274	CIB1		CIB1	calcium and integrin binding 1 (calmyrin)	Nucleus	other
-1,724	CISD1		CISD1	CDGSH iron sulfur domain 1	Cytoplasm	other
-1,842	CKB		CKB	creatine kinase, brain	Cytoplasm	kinase
-2,290	CKMT1A	D	CKMT1A/CKMT1B	creatine kinase, mitochondrial 1B	Cytoplasm	kinase
3,668	CKMT1B	D	CKMT1A/CKMT1B	creatine kinase, mitochondrial 1B	Cytoplasm	kinase
-1,241	CKS2		CKS2	CDC28 protein kinase regulatory subunit 2	Other	kinase
-2,942	CLDN1		CLDN1	claudin 1	Plasma Membrane	other
2,231	CLDN10		CLDN10	claudin 10	Plasma Membrane	other
1,305	CLDN7		CLDN7	claudin 7	Plasma Membrane	other
-1,107	CLIC1		CLIC1	chloride intracellular channel 1	Nucleus	ion channel
-1,178	CLIC4		CLIC4	chloride intracellular channel 4	Plasma Membrane	ion channel
1,342	CLSTN1		CLSTN1	calsyntenin 1	Plasma Membrane	other
-1,217	CLTA		CLTA	clathrin, light chain A	Plasma Membrane	other
2,320	CLU		CLU	clusterin	Cytoplasm	other
-1,154	CNBP		CNBP	CCHC-type zinc finger, nucleic acid binding protein	Nucleus	transcription regulator
-1,202	CNN2		CNN2	calponin 2	Cytoplasm	other
-1,330	CNN3		CNN3	calponin 3, acidic	Cytoplasm	other
-1,445	COTL1		COTL1	coactosin-like F-actin binding protein 1	Cytoplasm	other
1,563	COX6A1P2		COX6A1P2	cytochrome c oxidase subunit VIa polypeptide 1 pseudogene 2	Other	other
-1,126	COX6B1		COX6B1	cytochrome c oxidase subunit VIb polypeptide 1 (ubiquitous)	Cytoplasm	enzyme
-7,863	CPA4		CPA4	carboxypeptidase A4	Extracellular Space	peptidase
-1,093	CRABP2		CRABP2	cellular retinoic acid binding protein 2	Cytoplasm	transporter
1,621	EFCAB4A		CRACR2B	calcium release activated channel regulator 2B	Cytoplasm	other
2,165	CREB3L4		CREB3L4	cAMP responsive element binding protein 3-like 4	Nucleus	transcription regulator
-1,932	CRIM1		CRIM1	cysteine rich transmembrane BMP regulator 1 (chordin-like)	Extracellular Space	kinase
1,942	CRISP3		CRISP3	cysteine-rich secretory protein 3	Extracellular Space	other
1,392	CRNDE		CRNDE	colorectal neoplasia differentially expressed (non-protein coding)	Other	other
2,291	CRYAB		CRYAB	crystallin, alpha B	Nucleus	other
-2,118	CSAG3		CSAG2/CSAG3	CSAG family, member 3	Other	other
-1,091	CSDE1		CSDE1	cold shock domain containing E1, RNA-binding	Cytoplasm	enzyme
-1,512	CSRP1		CSRP1	cysteine and glycine-rich protein 1	Nucleus	other
-2,992	CST6		CST6	cystatin E/M	Extracellular Space	other
-1,161	CSTB		CSTB	cystatin B (stefin B)	Cytoplasm	peptidase
-1,598	CTSB		CTSB	cathepsin B	Cytoplasm	peptidase
1,161	CTSD		CTSD	cathepsin D	Cytoplasm	peptidase
-36,546	CXCL10		CXCL10	chemokine (C-X-C motif) ligand 10	Extracellular Space	cytokine	MDX-1100
-1,692	CXCL16		CXCL16	chemokine (C-X-C motif) ligand 16	Extracellular Space	cytokine
-8,217	IL8		CXCL8	chemokine (C-X-C motif) ligand 8	Extracellular Space	cytokine
1,440	CYP1B1		CYP1B1	cytochrome P450, family 1, subfamily B, polypeptide 1	Cytoplasm	enzyme
2,246	CYP4Z1		CYP4Z1	cytochrome P450, family 4, subfamily Z, polypeptide 1	Cytoplasm	enzyme
-1,803	CYR61		CYR61	cysteine-rich, angiogenic inducer, 61	Extracellular Space	other
-2,667	DAPL1		DAPL1	death associated protein-like 1	Other	other
-1,339	DARS		DARS	aspartyl-tRNA synthetase	Cytoplasm	enzyme
-1,264	DCUN1D5		DCUN1D5	DCN1, defective in cullin neddylation 1, domain containing 5	Other	other
-1,504	DDB2		DDB2	damage-specific DNA binding protein 2, 48kDa	Nucleus	other
1,365	DDIT4		DDIT4	DNA-damage-inducible transcript 4	Cytoplasm	other
-1,238	DDX1		DDX1	DEAD (Asp-Glu-Ala-Asp) box helicase 1	Nucleus	enzyme
-1,566	DEGS1		DEGS1	delta(4)-desaturase, sphingolipid 1	Plasma Membrane	enzyme
-7,193	DKK1		DKK1	dickkopf WNT signaling pathway inhibitor 1	Extracellular Space	growth factor
-1,365	DNAJA1		DNAJA1	DnaJ (Hsp40) homolog, subfamily A, member 1	Nucleus	other
-1,508	DNAJC15		DNAJC15	DnaJ (Hsp40) homolog, subfamily C, member 15	Cytoplasm	other
-1,220	DPM1		DPM1	dolichyl-phosphate mannosyltransferase polypeptide 1, catalytic subunit	Cytoplasm	enzyme
-1,156	DRAP1		DRAP1	DR1-associated protein 1 (negative cofactor 2 alpha)	Nucleus	transcription regulator
-1,268	DRG1		DRG1	developmentally regulated GTP binding protein 1	Cytoplasm	other
-1,163	DSTN		DSTN	destrin (actin depolymerizing factor)	Cytoplasm	other
1,304	DTX4		DTX4	deltex 4, E3 ubiquitin ligase	Cytoplasm	other
-1,542	DUSP12		DUSP12	dual specificity phosphatase 12	Nucleus	phosphatase
-1,186	DYNLL1		DYNLL1	dynein, light chain, LC8-type 1	Cytoplasm	other
1,531	E2F1		E2F1	E2F transcription factor 1	Nucleus	transcription regulator
-1,799	ECHDC1		ECHDC1	ethylmalonyl-CoA decarboxylase 1	Cytoplasm	enzyme
-2,317	EDN1		EDN1	endothelin 1	Extracellular Space	cytokine
-1,182	EEF1A1P5		EEF1A1P5	eukaryotic translation elongation factor 1 alpha 1 pseudogene 5	Other	other
-1,171	EEF1B2		EEF1B2	eukaryotic translation elongation factor 1 beta 2	Cytoplasm	translation regulator
-1,255	EEF1E1		EEF1E1	eukaryotic translation elongation factor 1 epsilon 1	Cytoplasm	translation regulator
1,200	EEF2		EEF2	eukaryotic translation elongation factor 2	Cytoplasm	translation regulator
-2,288	EFEMP1		EFEMP1	EGF containing fibulin-like extracellular matrix protein 1	Extracellular Space	enzyme
-1,247	EGFR		EGFR	epidermal growth factor receptor	Plasma Membrane	kinase	cetuximab, AEE 788, panitumumab, BMS-599626, varlitinib, XL647, bevacizumab/erlotinib, afatinib, sapitinib, cetuximab/irinotecan, lapatinib/pazopanib, irinotecan/panitumumab, erlotinib/vismodegib, erlotinib/gemcitabine, lapatinib/letrozole, capecitabine/lapatinib, bevacizumab/panitumumab, bevacizumab/cetuximab, capecitabine/erlotinib, lapatinib/paclitaxel, cabozantinib/erlotinib, lapatinib/trastu…
-1,247	EGFR		EGFR	epidermal growth factor receptor	Plasma Membrane	kinase	cetuximab, AEE 788, panitumumab, BMS-599626, varlitinib, XL647, bevacizumab/erlotinib, afatinib, sapitinib, cetuximab/irinotecan, lapatinib/pazopanib, irinotecan/panitumumab, erlotinib/vismodegib, erlotinib/gemcitabine, lapatinib/letrozole, capecitabine/lapatinib, bevacizumab/panitumumab, bevacizumab/cetuximab, capecitabine/erlotinib, lapatinib/paclitaxel, cabozantinib/erlotinib, lapatinib/trastu…
-1,439	EGLN3		EGLN3	egl-9 family hypoxia-inducible factor 3	Cytoplasm	enzyme
-1,231	EIF3D		EIF3D	eukaryotic translation initiation factor 3, subunit D	Cytoplasm	other
-1,148	EIF3I		EIF3I	eukaryotic translation initiation factor 3, subunit I	Cytoplasm	translation regulator
-1,313	EIF3J		EIF3J	eukaryotic translation initiation factor 3, subunit J	Cytoplasm	translation regulator
-1,313	EIF3M		EIF3M	eukaryotic translation initiation factor 3, subunit M	Other	other
-1,484	EIF4G2		EIF4G2	eukaryotic translation initiation factor 4 gamma, 2	Cytoplasm	translation regulator
-1,169	EIF4H		EIF4H	eukaryotic translation initiation factor 4H	Cytoplasm	translation regulator
-1,119	EIF5A		EIF5A	eukaryotic translation initiation factor 5A	Cytoplasm	translation regulator
-1,293	EIF6		EIF6	eukaryotic translation initiation factor 6	Cytoplasm	translation regulator
1,451	EMC6		EMC6	ER membrane protein complex subunit 6	Cytoplasm	other
-1,496	ENC1		ENC1	ectodermal-neural cortex 1 (with BTB domain)	Nucleus	peptidase
-1,294	ENO1		ENO1	enolase 1, (alpha)	Cytoplasm	enzyme
-1,156	EPCAM		EPCAM	epithelial cell adhesion molecule	Plasma Membrane	other	tucotuzumab celmoleukin, catumaxomab, adecatumumab
-1,585	EPHA2		EPHA2	EPH receptor A2	Plasma Membrane	kinase	dasatinib, regorafenib, dasatinib/dexamethasone/vincristine
-1,657	EPHB6		EPHB6	EPH receptor B6	Plasma Membrane	kinase
1,505	ERMP1		ERMP1	endoplasmic reticulum metallopeptidase 1	Cytoplasm	other
-1,212	ETF1		ETF1	eukaryotic translation termination factor 1	Cytoplasm	translation regulator
-2,559	ETS1		ETS1	v-ets avian erythroblastosis virus E26 oncogene homolog 1	Nucleus	transcription regulator
-1,241	EXT2		EXT2	exostosin glycosyltransferase 2	Cytoplasm	enzyme
-1,570	F2RL1		F2RL1	coagulation factor II (thrombin) receptor-like 1	Plasma Membrane	G-protein coupled receptor
-2,442	F3		F3	coagulation factor III (thromboplastin, tissue factor)	Plasma Membrane	transmembrane receptor	activated recombinant human factor VII
-2,602	FADS3		FADS3	fatty acid desaturase 3	Plasma Membrane	enzyme
-2,334	FAM167B		FAM167B	family with sequence similarity 167, member B	Other	other
-1,584	FAM20C		FAM20C	family with sequence similarity 20, member C	Extracellular Space	enzyme
1,903	FAM210B		FAM210B	family with sequence similarity 210, member B	Extracellular Space	other
-2,872	FAM25C		FAM25A (includes others)	family with sequence similarity 25, member A	Other	other
-1,911	FAM26F		FAM26F	family with sequence similarity 26, member F	Other	other
1,313	FAM32A		FAM32A	family with sequence similarity 32, member A	Nucleus	other
1,516	FAM35A		FAM35A	family with sequence similarity 35, member A	Extracellular Space	other
-1,186	FAM83D		FAM83D	family with sequence similarity 83, member D	Other	other
3,047	FAM84A		FAM84A	family with sequence similarity 84, member A	Other	other
-1,542	FAM96B		FAM96B	family with sequence similarity 96, member B	Cytoplasm	other
-1,185	FARSA		FARSA	phenylalanyl-tRNA synthetase, alpha subunit	Cytoplasm	enzyme
1,267	FASN		FASN	fatty acid synthase	Cytoplasm	enzyme	orlistat, cerulenin
-1,370	FBLN1		FBLN1	fibulin 1	Extracellular Space	other
-2,419	FBXO2		FBXO2	F-box protein 2	Cytoplasm	enzyme
-1,609	FEM1A		FEM1A	fem-1 homolog a (C. elegans)	Nucleus	transcription regulator
-2,226	FERMT2		FERMT2	fermitin family member 2	Cytoplasm	other
-1,236	FH		FH	fumarate hydratase	Cytoplasm	enzyme
-1,504	FJX1		FJX1	four jointed box 1 (Drosophila)	Extracellular Space	other
-1,349	FKBP4		FKBP4	FK506 binding protein 4, 59kDa	Nucleus	enzyme
-1,350	FLNA		FLNA	filamin A, alpha	Cytoplasm	other
-4,145	FOLR1		FOLR1	folate receptor 1 (adult)	Plasma Membrane	transporter
-3,555	FOSL1		FOSL1	FOS-like antigen 1	Nucleus	transcription regulator
-1,920	FOXQ1		FOXQ1	forkhead box Q1	Nucleus	transcription regulator
-4,973	FSCN1		FSCN1	fascin actin-bundling protein 1	Cytoplasm	other
-1,125	FTL		FTL	ferritin, light polypeptide	Cytoplasm	enzyme
-1,338	FTSJ1		FTSJ1	FtsJ RNA methyltransferase homolog 1 (E. coli)	Other	enzyme
-2,213	FUT8		FUT8	fucosyltransferase 8 (alpha (1,6) fucosyltransferase)	Cytoplasm	enzyme
1,239	FXYD3		FXYD3	FXYD domain containing ion transport regulator 3	Plasma Membrane	other
-1,283	FXYD5		FXYD5	FXYD domain containing ion transport regulator 5	Plasma Membrane	ion channel
1,500	G3BP2		G3BP2	GTPase activating protein (SH3 domain) binding protein 2	Cytoplasm	enzyme
1,529	GAA		GAA	glucosidase, alpha; acid	Cytoplasm	enzyme	miglitol, acarbose
-1,819	GABARAPL1		GABARAPL1	GABA(A) receptor-associated protein like 1	Cytoplasm	other
-1,281	GABARAPL2		GABARAPL2	GABA(A) receptor-associated protein-like 2	Cytoplasm	other
-1,989	GADD45A		GADD45A	growth arrest and DNA-damage-inducible, alpha	Nucleus	other
1,554	GANAB		GANAB	glucosidase, alpha; neutral AB	Cytoplasm	enzyme	miglitol
-1,132	GAPDH		GAPDH	glyceraldehyde-3-phosphate dehydrogenase	Cytoplasm	enzyme
-2,160	GAS6		GAS6	growth arrest-specific 6	Extracellular Space	growth factor
2,242	GBAP1		GBAP1	glucosidase, beta, acid pseudogene 1	Other	other
-1,314	GBAS		GBAS	glioblastoma amplified sequence	Plasma Membrane	other
-1,580	GBP1		GBP1	guanylate binding protein 1, interferon-inducible	Cytoplasm	enzyme
-1,148	GDI2		GDI2	GDP dissociation inhibitor 2	Cytoplasm	other
-5,422	GFPT2		GFPT2	glutamine-fructose-6-phosphate transaminase 2	Cytoplasm	enzyme
1,631	GGT6		GGT6	gamma-glutamyltransferase 6	Plasma Membrane	peptidase
-1,138	GHITM		GHITM	growth hormone inducible transmembrane protein	Cytoplasm	other
1,535	GJA5		GJA5	gap junction protein, alpha 5, 40kDa	Plasma Membrane	transporter
-1,233	GLO1		GLO1	glyoxalase I	Cytoplasm	enzyme
-1,273	GLRX3		GLRX3	glutaredoxin 3	Cytoplasm	enzyme
1,363	GLTP		GLTP	glycolipid transfer protein	Cytoplasm	transporter
-1,310	GLUD1		GLUD1	glutamate dehydrogenase 1	Cytoplasm	enzyme
1,323	GLUL		GLUL	glutamate-ammonia ligase	Cytoplasm	enzyme
1,875	GLYATL2		GLYATL2	glycine-N-acyltransferase-like 2	Other	other
-1,155	GNAI3		GNAI3	guanine nucleotide binding protein (G protein), alpha inhibiting activity polypeptide 3	Cytoplasm	enzyme
-1,220	GNB1		GNB1	guanine nucleotide binding protein (G protein), beta polypeptide 1	Plasma Membrane	enzyme
-1,124	GNB2L1		GNB2L1	guanine nucleotide binding protein (G protein), beta polypeptide 2-like 1	Cytoplasm	enzyme
-1,117	GNG5		GNG5	guanine nucleotide binding protein (G protein), gamma 5	Plasma Membrane	other
1,785	GPAA1		GPAA1	glycosylphosphatidylinositol anchor attachment 1	Cytoplasm	enzyme
-1,211	GPI		GPI	glucose-6-phosphate isomerase	Extracellular Space	enzyme
-1,221	GPR56		GPR56	G protein-coupled receptor 56	Plasma Membrane	G-protein coupled receptor
-2,046	GPRC5C		GPRC5C	G protein-coupled receptor, class C, group 5, member C	Plasma Membrane	G-protein coupled receptor
1,828	GRB7		GRB7	growth factor receptor-bound protein 7	Plasma Membrane	other
-1,542	GRINA		GRINA	glutamate receptor, ionotropic, N-methyl D-aspartate-associated protein 1 (glutamate binding)	Other	ion channel
-3,481	H19		H19	H19, imprinted maternally expressed transcript (non-protein coding)	Cytoplasm	other
1,449	H1F0		H1F0	H1 histone family, member 0	Nucleus	other
1,503	H2AFJ		H2AFJ	H2A histone family, member J	Cytoplasm	other
-1,129	H2AFZ		H2AFZ	H2A histone family, member Z	Nucleus	other
-1,225	H3F3B	D	H3F3A/H3F3B	H3 histone, family 3A	Nucleus	other
1,293	H3F3A	D	H3F3A/H3F3B	H3 histone, family 3A	Nucleus	other
2,703	HABP4		HABP4	hyaluronan binding protein 4	Cytoplasm	other
-1,252	PTPLB		HACD2	3-hydroxyacyl-CoA dehydratase 2	Cytoplasm	phosphatase
-1,391	HCCS		HCCS	holocytochrome c synthase	Cytoplasm	enzyme
1,992	HDAC5		HDAC5	histone deacetylase 5	Nucleus	transcription regulator	tributyrin, belinostat, pyroxamide, romidepsin
-1,216	HDDC2		HDDC2	HD domain containing 2	Cytoplasm	other
2,220	HECA		HECA	headcase homolog (Drosophila)	Other	other
-3,631	HEG1		HEG1	heart development protein with EGF-like domains 1	Plasma Membrane	other
-5,363	HES2		HES2	hes family bHLH transcription factor 2	Nucleus	other
-1,516	HIF1A		HIF1A	hypoxia inducible factor 1, alpha subunit (basic helix-loop-helix transcription factor)	Nucleus	transcription regulator
-1,155	HINT1		HINT1	histidine triad nucleotide binding protein 1	Nucleus	enzyme
1,621	HIST1H2AC		HIST1H2AC	histone cluster 1, H2ac	Nucleus	other
1,621	HIST1H2AC		HIST1H2AC	histone cluster 1, H2ac	Nucleus	other
1,752	HIST1H2BD		HIST1H2BD	histone cluster 1, H2bd	Nucleus	other
1,528	HIST1H2BK		HIST1H2BK	histone cluster 1, H2bk	Nucleus	other
-1,078	HLA-B		HLA-B	major histocompatibility complex, class I, B	Plasma Membrane	transmembrane receptor
1,227	HMGA1		HMGA1	high mobility group AT-hook 1	Nucleus	transcription regulator
1,095	HMGN2		HMGN2	high mobility group nucleosomal binding domain 2	Nucleus	other
-1,225	HN1		HN1	hematological and neurological expressed 1	Nucleus	other
-1,079	HNRNPA2B1		HNRNPA2B1	heterogeneous nuclear ribonucleoprotein A2/B1	Nucleus	other
-1,150	HNRNPC		HNRNPC	heterogeneous nuclear ribonucleoprotein C (C1/C2)	Nucleus	other
-1,300	HPRT1		HPRT1	hypoxanthine phosphoribosyltransferase 1	Cytoplasm	enzyme	6-mercaptopurine, thioguanine, azathioprine, 6-mercaptopurine/methotrexate/prednisone/vincristine, cyclophosphamide/cytarabine/6-mercaptopurine
1,907	HRASLS2		HRASLS2	HRAS-like suppressor 2	Other	other
1,709	HSD17B2		HSD17B2	hydroxysteroid (17-beta) dehydrogenase 2	Cytoplasm	enzyme
-1,071	HSP90AA1		HSP90AA1	heat shock protein 90kDa alpha (cytosolic), class A member 1	Cytoplasm	enzyme	alvespimycin, retaspimycin, luminespib, cisplatin
-1,263	HSP90AB1		HSP90AB1	heat shock protein 90kDa alpha (cytosolic), class B member 1	Cytoplasm	enzyme	alvespimycin, retaspimycin, cisplatin
-1,160	HSPA1A		HSPA1A/HSPA1B	heat shock 70kDa protein 1A	Cytoplasm	enzyme
-1,207	HSPA4		HSPA4	heat shock 70kDa protein 4	Cytoplasm	other
-1,206	HSPA8		HSPA8	heat shock 70kDa protein 8	Cytoplasm	enzyme
-1,834	HSPB1		HSPB1	heat shock 27kDa protein 1	Cytoplasm	other
-1,439	HSPE1		HSPE1	heat shock 10kDa protein 1	Cytoplasm	enzyme
-1,461	HSPH1		HSPH1	heat shock 105kDa/110kDa protein 1	Cytoplasm	other
-3,124	ICAM1		ICAM1	intercellular adhesion molecule 1	Plasma Membrane	transmembrane receptor
-1,878	ID1		ID1	inhibitor of DNA binding 1, dominant negative helix-loop-helix protein	Nucleus	transcription regulator
-1,271	IDH3B		IDH3B	isocitrate dehydrogenase 3 (NAD+) beta	Cytoplasm	enzyme
1,350	IER2		IER2	immediate early response 2	Cytoplasm	other
1,225	IER3		IER3	immediate early response 3	Cytoplasm	other
-2,237	IFFO2		IFFO2	intermediate filament family orphan 2	Other	other
-2,636	IFITM1		IFITM1	interferon induced transmembrane protein 1	Plasma Membrane	transmembrane receptor
-1,315	IFITM2		IFITM2	interferon induced transmembrane protein 2	Other	other
-2,249	IFNGR1		IFNGR1	interferon gamma receptor 1	Plasma Membrane	transmembrane receptor	interferon gamma-1b
-1,753	IFNGR2		IFNGR2	interferon gamma receptor 2 (interferon gamma transducer 1)	Plasma Membrane	transmembrane receptor	interferon gamma-1b
-1,387	IGFBP3		IGFBP3	insulin-like growth factor binding protein 3	Extracellular Space	other
-2,752	IGFL1		IGFL1	IGF-like family member 1	Extracellular Space	other
-1,850	IKBKE		IKBKE	inhibitor of kappa light polypeptide gene enhancer in B-cells, kinase epsilon	Cytoplasm	kinase
-1,870	IL18		IL18	interleukin 18	Extracellular Space	cytokine
-7,690	IL22RA2		IL22RA2	interleukin 22 receptor, alpha 2	Plasma Membrane	transmembrane receptor
-1,438	IL27RA		IL27RA	interleukin 27 receptor, alpha	Plasma Membrane	transmembrane receptor
-22,902	IL32		IL32	interleukin 32	Extracellular Space	cytokine
-10,777	IL7R		IL7R	interleukin 7 receptor	Plasma Membrane	transmembrane receptor	recombinant human interleukin-7
-1,158	ILF2		ILF2	interleukin enhancer binding factor 2	Nucleus	transcription regulator
1,512	INSIG1		INSIG1	insulin induced gene 1	Cytoplasm	other
1,209	IRAK1		IRAK1	interleukin-1 receptor-associated kinase 1	Plasma Membrane	kinase
1,679	IRX3		IRX3	iroquois homeobox 3	Nucleus	transcription regulator
1,538	IRX5		IRX5	iroquois homeobox 5	Nucleus	transcription regulator
-1,420	ISG15		ISG15	ISG15 ubiquitin-like modifier	Extracellular Space	other
-1,234	ISYNA1		ISYNA1	inositol-3-phosphate synthase 1	Cytoplasm	enzyme
-1,741	ITGA3		ITGA3	integrin, alpha 3 (antigen CD49C, alpha 3 subunit of VLA-3 receptor)	Plasma Membrane	other
-5,917	ITGA5		ITGA5	integrin, alpha 5 (fibronectin receptor, alpha polypeptide)	Plasma Membrane	transmembrane receptor
-1,555	ITGAV		ITGAV	integrin, alpha V	Plasma Membrane	ion channel	abciximab, CNTO 95, cilengitide
-1,276	ITGB1		ITGB1	integrin, beta 1 (fibronectin receptor, beta polypeptide, antigen CD29 includes MDF2, MSK12)	Plasma Membrane	transmembrane receptor
-1,527	IVL		IVL	involucrin	Cytoplasm	other
-1,920	JAG1		JAG1	jagged 1	Extracellular Space	growth factor
1,417	KCNN4		KCNN4	potassium channel, calcium activated intermediate/small conductance subfamily N alpha, member 4	Plasma Membrane	ion channel	betamethasone/clotrimazole, clotrimazole, senicapoc
1,636	KIAA1161		KIAA1161	KIAA1161	Nucleus	other
2,893	KIAA1324		KIAA1324	KIAA1324	Plasma Membrane	other
1,254	KIAA1522		KIAA1522	KIAA1522	Other	other
-1,664	KIRREL		KIRREL	kin of IRRE like (Drosophila)	Plasma Membrane	other
-1,624	KITLG		KITLG	KIT ligand	Extracellular Space	growth factor
1,296	KLHDC3		KLHDC3	kelch domain containing 3	Cytoplasm	other
-1,443	KLHL5		KLHL5	kelch-like family member 5	Extracellular Space	other
-1,576	KLK10		KLK10	kallikrein-related peptidase 10	Extracellular Space	peptidase
-1,100	KLK6		KLK6	kallikrein-related peptidase 6	Extracellular Space	peptidase
-3,560	KMO		KMO	kynurenine 3-monooxygenase (kynurenine 3-hydroxylase)	Cytoplasm	enzyme
-1,255	KPNA2		KPNA2	karyopherin alpha 2 (RAG cohort 1, importin alpha 1)	Nucleus	transporter
-1,592	KRT10		KRT10	keratin 10, type I	Cytoplasm	other
2,132	KRT14		KRT14	keratin 14, type I	Cytoplasm	other
2,323	KRT15		KRT15	keratin 15, type I	Cytoplasm	other
-2,045	KRT17		KRT17	keratin 17, type I	Cytoplasm	other
-1,406	KRT18		KRT18	keratin 18, type I	Cytoplasm	other
-11,204	KRT34		KRT34	keratin 34, type I	Cytoplasm	other
1,719	KRT4		KRT4	keratin 4, type II	Cytoplasm	other
-1,659	KRT5		KRT5	keratin 5, type II	Cytoplasm	other
-2,878	KRT6A		KRT6A	keratin 6A, type II	Other	other
-2,704	KRT6B		KRT6B	keratin 6B, type II	Cytoplasm	other
-1,096	KRT7		KRT7	keratin 7, type II	Cytoplasm	other
-8,098	KRT75		KRT75	keratin 75, type II	Cytoplasm	other
-1,226	KRT8		KRT8	keratin 8, type II	Cytoplasm	other
-1,465	KRT80		KRT80	keratin 80, type II	Cytoplasm	other
-1,388	KRT81		KRT81	keratin 81, type II	Cytoplasm	other
-2,228	KRT86		KRT86	keratin 86, type II	Cytoplasm	other
-21,319	KRTAP3-1		KRTAP3-1	keratin associated protein 3-1	Other	other
-11,864	L1CAM		L1CAM	L1 cell adhesion molecule	Plasma Membrane	other
-1,730	LAMB1		LAMB1	laminin, beta 1	Extracellular Space	other
-5,610	LAMB3		LAMB3	laminin, beta 3	Extracellular Space	transporter
-2,772	LAMC2		LAMC2	laminin, gamma 2	Extracellular Space	other
-1,152	LANCL2		LANCL2	LanC lantibiotic synthetase component C-like 2 (bacterial)	Plasma Membrane	other
-1,222	LAPTM4B		LAPTM4B	lysosomal protein transmembrane 4 beta	Other	other
-1,330	LASP1		LASP1	LIM and SH3 protein 1	Cytoplasm	transporter
3,013	LBH		LBH	limb bud and heart development	Nucleus	transcription regulator
-1,527	LDHA		LDHA	lactate dehydrogenase A	Cytoplasm	enzyme
-1,673	LDHB		LDHB	lactate dehydrogenase B	Cytoplasm	enzyme
1,565	LENG8		LENG8	leukocyte receptor cluster (LRC) member 8	Other	other
-1,771	LGALS1		LGALS1	lectin, galactoside-binding, soluble, 1	Extracellular Space	other
-3,669	LIF		LIF	leukemia inhibitory factor	Extracellular Space	cytokine
1,349	LMF2		LMF2	lipase maturation factor 2	Other	other
1,500	PRODH		LOC102724788/PRODH	proline dehydrogenase (oxidase) 1	Cytoplasm	enzyme
-2,631	LOXL2		LOXL2	lysyl oxidase-like 2	Extracellular Space	enzyme
-1,681	LPCAT2		LPCAT2	lysophosphatidylcholine acyltransferase 2	Cytoplasm	enzyme
-1,302	LRRC42		LRRC42	leucine rich repeat containing 42	Other	other
-1,219	LSR		LSR	lipolysis stimulated lipoprotein receptor	Nucleus	transcription regulator
1,645	LYNX1		LYNX1	Ly6/neurotoxin 1	Plasma Membrane	transporter
-1,817	LYPD6B		LYPD6B	LY6/PLAUR domain containing 6B	Other	other
-1,817	LYPD6B		LYPD6B	LY6/PLAUR domain containing 6B	Other	other
-1,428	MAD2L1		MAD2L1	MAD2 mitotic arrest deficient-like 1 (yeast)	Nucleus	other
-1,280	MAGEA12		MAGEA12	melanoma antigen family A12	Other	other
-1,292	MAGEA2B	D	MAGEA2/MAGEA2B	melanoma antigen family A2	Nucleus	other
3,112	MAGEA2	D	MAGEA2/MAGEA2B	melanoma antigen family A2	Nucleus	other
-1,118	MAGEA6		MAGEA3/MAGEA6	melanoma antigen family A6	Other	other
-1,308	MAGOH		MAGOH	mago-nashi homolog, proliferation-associated (Drosophila)	Nucleus	other
-9,630	MAL		MAL	mal, T-cell differentiation protein	Plasma Membrane	transporter
1,438	MAPK13		MAPK13	mitogen-activated protein kinase 13	Cytoplasm	kinase	talmapimod
-1,162	MAPRE1		MAPRE1	microtubule-associated protein, RP/EB family, member 1	Cytoplasm	other
-1,365	MARCKS		MARCKS	myristoylated alanine-rich protein kinase C substrate	Plasma Membrane	other
1,307	MAZ		MAZ	MYC-associated zinc finger protein (purine-binding transcription factor)	Nucleus	transcription regulator
-37,894	MB		MB	myoglobin	Cytoplasm	transporter
-1,494	MBNL2		MBNL2	muscleblind-like splicing regulator 2	Other	other
-1,517	MCFD2		MCFD2	multiple coagulation factor deficiency 2	Cytoplasm	other
-1,210	MCL1		MCL1	myeloid cell leukemia 1	Cytoplasm	transporter
-1,297	MDH1		MDH1	malate dehydrogenase 1, NAD (soluble)	Cytoplasm	enzyme
-1,482	MICB		MICB	MHC class I polypeptide-related sequence B	Plasma Membrane	transmembrane receptor
1,126	MIF		MIF	macrophage migration inhibitory factor (glycosylation-inhibiting factor)	Extracellular Space	cytokine
1,672	MIR3654		MIR3654	microRNA 3654	Cytoplasm	microRNA
-1,305	MMADHC		MMADHC	methylmalonic aciduria (cobalamin deficiency) cblD type, with homocystinuria	Cytoplasm	other
-2,861	MMP7		MMP7	matrix metallopeptidase 7 (matrilysin, uterine)	Extracellular Space	peptidase	marimastat
-1,156	MORF4L2		MORF4L2	mortality factor 4 like 2	Nucleus	other
-1,533	MOSPD1		MOSPD1	motile sperm domain containing 1	Other	other
-2,513	MRPL12		MRPL12	mitochondrial ribosomal protein L12	Cytoplasm	other
-1,370	MRPL33		MRPL33	mitochondrial ribosomal protein L33	Cytoplasm	other
-1,207	MRPL39		MRPL39	mitochondrial ribosomal protein L39	Cytoplasm	other
-1,249	MRPS15		MRPS15	mitochondrial ribosomal protein S15	Cytoplasm	other
-1,237	MRPS24		MRPS24	mitochondrial ribosomal protein S24	Cytoplasm	other
-1,361	MSN		MSN	moesin	Plasma Membrane	other
1,301	MT-CYB		MT-CYB	cytochrome b	Cytoplasm	enzyme	atovaquone, atovaquone/proguanil
1,172	MT-ND1		MT-ND1	NADH dehydrogenase, subunit 1 (complex I)	Cytoplasm	enzyme
1,243	MT-ND2		MT-ND2	MTND2	Cytoplasm	enzyme
1,295	MT-ND3		MT-ND3	NADH dehydrogenase, subunit 3 (complex I)	Cytoplasm	enzyme
1,206	MT-ND4		MT-ND4	NADH dehydrogenase, subunit 4 (complex I)	Cytoplasm	enzyme
1,420	MT-ND5		MT-ND5	NADH dehydrogenase, subunit 5 (complex I)	Cytoplasm	enzyme
1,348	MT1X		MT1X	metallothionein 1X	Other	other
1,477	MT2A		MT2A	metallothionein 2A	Cytoplasm	other
1,335	MUC1		MUC1	mucin 1, cell surface associated	Plasma Membrane	transmembrane receptor	HuHMFG1
4,679	MUCL1		MUCL1	mucin-like 1	Cytoplasm	other
-1,661	MYEOV		MYEOV	myeloma overexpressed	Nucleus	other
-1,628	MYL12A		MYL12A	myosin, light chain 12A, regulatory, non-sarcomeric	Cytoplasm	other
-1,193	MYL12B		MYL12B	myosin, light chain 12B, regulatory	Cytoplasm	other
-1,915	MYO1B		MYO1B	myosin IB	Cytoplasm	other
-1,281	MYOF		MYOF	myoferlin	Nucleus	other
-2,470	NABP1		NABP1	nucleic acid binding protein 1	Nucleus	other
-1,232	NCL		NCL	nucleolin	Nucleus	other
-1,379	NCOA4		NCOA4	nuclear receptor coactivator 4	Nucleus	transcription regulator
-1,984	NCOA7		NCOA7	nuclear receptor coactivator 7	Nucleus	transcription regulator
1,994	NDUFC2-KCTD14		NDUFC2-KCTD14	NDUFC2-KCTD14 readthrough	Other	other
-1,068	NDUFS5		NDUFS5	NADH dehydrogenase (ubiquinone) Fe-S protein 5, 15kDa (NADH-coenzyme Q reductase)	Cytoplasm	enzyme
1,832	NEAT1		NEAT1	nuclear paraspeckle assembly transcript 1 (non-protein coding)	Other	other
1,798	NECAB3		NECAB3	N-terminal EF-hand calcium binding protein 3	Cytoplasm	other
-1,429	NEDD8-MDP1		NEDD8-MDP1	NEDD8-MDP1 readthrough	Other	other
-2,929	NEURL3		NEURL3	neuralized E3 ubiquitin protein ligase 3	Other	other
-1,268	NFE2L2		NFE2L2	nuclear factor, erythroid 2-like 2	Nucleus	transcription regulator
-1,874	NFE2L3		NFE2L3	nuclear factor, erythroid 2-like 3	Nucleus	transcription regulator
1,407	NFIX		NFIX	nuclear factor I/X (CCAAT-binding transcription factor)	Nucleus	transcription regulator
-1,548	NFKB2		NFKB2	nuclear factor of kappa light polypeptide gene enhancer in B-cells 2 (p49/p100)	Nucleus	transcription regulator
-1,848	NFKBIA		NFKBIA	nuclear factor of kappa light polypeptide gene enhancer in B-cells inhibitor, alpha	Cytoplasm	transcription regulator
-1,673	NFKBIE		NFKBIE	nuclear factor of kappa light polypeptide gene enhancer in B-cells inhibitor, epsilon	Nucleus	transcription regulator
1,871	NFKBIZ		NFKBIZ	nuclear factor of kappa light polypeptide gene enhancer in B-cells inhibitor, zeta	Nucleus	transcription regulator
-1,167	NME2		NME2	NME/NM23 nucleoside diphosphate kinase 2	Nucleus	kinase
-1,186	NOL7		NOL7	nucleolar protein 7, 27kDa	Nucleus	other
1,470	NOLC1		NOLC1	nucleolar and coiled-body phosphoprotein 1	Nucleus	transcription regulator
-1,170	NOP10		NOP10	NOP10 ribonucleoprotein	Nucleus	other
-1,342	NPM1		NPM1	nucleophosmin (nucleolar phosphoprotein B23, numatrin)	Nucleus	transcription regulator
3,453	NRK		NRK	Nik related kinase	Other	kinase
-1,123	NUCKS1		NUCKS1	nuclear casein kinase and cyclin-dependent kinase substrate 1	Nucleus	kinase
1,334	NUDT3		NUDT3	nudix (nucleoside diphosphate linked moiety X)-type motif 3	Cytoplasm	phosphatase
1,377	NUPR1		NUPR1	nuclear protein, transcriptional regulator, 1	Nucleus	transcription regulator
-1,486	OLA1		OLA1	Obg-like ATPase 1	Cytoplasm	other
-3,444	OLFML3		OLFML3	olfactomedin-like 3	Extracellular Space	other
-3,859	OLR1		OLR1	oxidized low density lipoprotein (lectin-like) receptor 1	Plasma Membrane	transmembrane receptor
-1,509	OPTN		OPTN	optineurin	Cytoplasm	other
1,504	OS9		OS9	osteosarcoma amplified 9, endoplasmic reticulum lectin	Nucleus	other
1,742	OSBP2		OSBP2	oxysterol binding protein 2	Cytoplasm	other
-1,328	C20orf111		OSER1	oxidative stress responsive serine-rich 1	Other	kinase
-2,578	LEPREL1		P3H2	prolyl 3-hydroxylase 2	Cytoplasm	enzyme
1,197	P4HB		P4HB	prolyl 4-hydroxylase, beta polypeptide	Cytoplasm	enzyme
1,191	PABPC4		PABPC4	poly(A) binding protein, cytoplasmic 4 (inducible form)	Cytoplasm	translation regulator
1,233	PADI2		PADI2	peptidyl arginine deiminase, type II	Cytoplasm	enzyme
-4,483	PADI3		PADI3	peptidyl arginine deiminase, type III	Cytoplasm	enzyme
-1,348	PAK1IP1		PAK1IP1	PAK1 interacting protein 1	Nucleus	other
1,413	PC		PC	pyruvate carboxylase	Cytoplasm	enzyme
-1,179	PCBP1		PCBP1	poly(rC) binding protein 1	Nucleus	translation regulator
1,865	PCNXL3		PCNXL3	pecanex-like 3 (Drosophila)	Other	other
-1,270	PDCD5		PDCD5	programmed cell death 5	Nucleus	other
-1,309	PDCL3		PDCL3	phosducin-like 3	Cytoplasm	other
-2,174	PDLIM1		PDLIM1	PDZ and LIM domain 1	Cytoplasm	transcription regulator
-2,123	PDZK1		PDZK1	PDZ domain containing 1	Plasma Membrane	transporter
-1,258	PEA15		PEA15	phosphoprotein enriched in astrocytes 15	Cytoplasm	transporter
1,734	PEG10		PEG10	paternally expressed 10	Nucleus	other
1,579	PERP		PERP	PERP, TP53 apoptosis effector	Plasma Membrane	other
-1,251	PFDN2		PFDN2	prefoldin subunit 2	Cytoplasm	other
1,439	PFKL		PFKL	phosphofructokinase, liver	Cytoplasm	kinase
-1,588	PFKP		PFKP	phosphofructokinase, platelet	Cytoplasm	kinase
-1,177	PFN1		PFN1	profilin 1	Cytoplasm	other
-1,216	PGAM1		PGAM1	phosphoglycerate mutase 1 (brain)	Cytoplasm	phosphatase
-1,331	PGK1		PGK1	phosphoglycerate kinase 1	Cytoplasm	kinase
-1,267	PGM1		PGM1	phosphoglucomutase 1	Cytoplasm	enzyme
-1,267	PGM1		PGM1	phosphoglucomutase 1	Cytoplasm	enzyme
-1,686	PI3		PI3	peptidase inhibitor 3, skin-derived	Extracellular Space	other
-1,468	PICALM		PICALM	phosphatidylinositol binding clathrin assembly protein	Cytoplasm	other
1,472	PILRB		PILRB	paired immunoglobin-like type 2 receptor beta	Plasma Membrane	other
-1,331	PINK1		PINK1	PTEN induced putative kinase 1	Cytoplasm	kinase
1,761	PITX1		PITX1	paired-like homeodomain 1	Nucleus	transcription regulator
-1,252	PKM		PKM	pyruvate kinase, muscle	Cytoplasm	kinase
-1,577	PKN1		PKN1	protein kinase N1	Cytoplasm	kinase
1,303	PLA2G16		PLA2G16	phospholipase A2, group XVI	Nucleus	enzyme
-3,007	PLA2G2A		PLA2G2A	phospholipase A2, group IIA (platelets, synovial fluid)	Cytoplasm	enzyme	varespladib methyl, varespladib, indomethacin
-1,607	PLEK2		PLEK2	pleckstrin 2	Other	other
-1,535	PLEKHF1		PLEKHF1	pleckstrin homology domain containing, family F (with FYVE domain) member 1	Cytoplasm	other
-1,403	PLOD2		PLOD2	procollagen-lysine, 2-oxoglutarate 5-dioxygenase 2	Cytoplasm	enzyme
-1,147	PLP2		PLP2	proteolipid protein 2 (colonic epithelium-enriched)	Cytoplasm	transporter
-1,169	PLS3		PLS3	plastin 3	Cytoplasm	other
1,276	PMVK		PMVK	phosphomevalonate kinase	Cytoplasm	kinase
-1,344	PNP		PNP	purine nucleoside phosphorylase	Nucleus	enzyme	forodesine, PD 141955
1,399	PNRC2		PNRC2	proline-rich nuclear receptor coactivator 2	Nucleus	other
-1,205	POLR2K		POLR2K	polymerase (RNA) II (DNA directed) polypeptide K, 7.0kDa	Nucleus	enzyme
-1,246	POMP		POMP	proteasome maturation protein	Nucleus	other
-1,360	PPA1		PPA1	pyrophosphatase (inorganic) 1	Cytoplasm	enzyme
1,281	PPDPF		PPDPF	pancreatic progenitor cell differentiation and proliferation factor	Other	other
-1,057	PPIA		PPIA	peptidylprolyl isomerase A (cyclophilin A)	Cytoplasm	enzyme	N-methyl-4-Ile-cyclosporin
-1,358	PPIH		PPIH	peptidylprolyl isomerase H (cyclophilin H)	Nucleus	enzyme
-1,194	PPM1G		PPM1G	protein phosphatase, Mg2+/Mn2+ dependent, 1G	Nucleus	phosphatase
-1,636	PPME1		PPME1	protein phosphatase methylesterase 1	Other	enzyme
2,406	PPP1R1B		PPP1R1B	protein phosphatase 1, regulatory (inhibitor) subunit 1B	Cytoplasm	phosphatase
2,613	PPP1R3C		PPP1R3C	protein phosphatase 1, regulatory subunit 3C	Cytoplasm	phosphatase
1,405	PRDX4		PRDX4	peroxiredoxin 4	Cytoplasm	enzyme
-1,242	PRDX6		PRDX6	peroxiredoxin 6	Cytoplasm	enzyme
-1,337	PRELID1		PRELID1	PRELI domain containing 1	Cytoplasm	other
-1,569	PREP		PREP	prolyl endopeptidase	Cytoplasm	peptidase	Z 321
-1,400	PRPF38A		PRPF38A	pre-mRNA processing factor 38A	Nucleus	other
-14,131	PRR9		PRR9	proline rich 9	Other	other
-1,522	PRRG4		PRRG4	proline rich Gla (G-carboxyglutamic acid) 4 (transmembrane)	Plasma Membrane	other
-1,374	PSMA2		PSMA2	proteasome (prosome, macropain) subunit, alpha type, 2	Cytoplasm	peptidase
-1,259	PSMA3		PSMA3	proteasome (prosome, macropain) subunit, alpha type, 3	Cytoplasm	peptidase
-1,204	PSMA4		PSMA4	proteasome (prosome, macropain) subunit, alpha type, 4	Cytoplasm	peptidase
-1,312	PSMA5		PSMA5	proteasome (prosome, macropain) subunit, alpha type, 5	Cytoplasm	peptidase
-1,174	PSMA7		PSMA7	proteasome (prosome, macropain) subunit, alpha type, 7	Cytoplasm	peptidase
-1,175	PSMB1		PSMB1	proteasome (prosome, macropain) subunit, beta type, 1	Cytoplasm	peptidase	carfilzomib, bortezomib/cladribine/rituximab, bortezomib/sorafenib, bortezomib/paclitaxel, bortezomib/dexamethasone, bortezomib/dexamethasone/doxorubicin, bortezomib/dexamethasone/lenalidomide, bortezomib/dexamethasone/thalidomide, carfilzomib/dexamethasone/lenalidomide, bortezomib/prednisone, bortezomib/doxorubicin, bortezomib/vorinostat, bortezomib/thalidomide, bortezomib/rituximab, bortezomib/…
-1,179	PSMB3		PSMB3	proteasome (prosome, macropain) subunit, beta type, 3	Cytoplasm	peptidase
-1,195	PSMB4		PSMB4	proteasome (prosome, macropain) subunit, beta type, 4	Cytoplasm	peptidase
-1,168	PSMB6		PSMB6	proteasome (prosome, macropain) subunit, beta type, 6	Other	peptidase
-1,184	PSMB7		PSMB7	proteasome (prosome, macropain) subunit, beta type, 7	Cytoplasm	peptidase
-1,268	PSMC1		PSMC1	proteasome (prosome, macropain) 26S subunit, ATPase, 1	Nucleus	peptidase
-1,329	PSMC2		PSMC2	proteasome (prosome, macropain) 26S subunit, ATPase, 2	Nucleus	peptidase
-1,368	PSMC4		PSMC4	proteasome (prosome, macropain) 26S subunit, ATPase, 4	Nucleus	peptidase
-1,276	PSMD2		PSMD2	proteasome (prosome, macropain) 26S subunit, non-ATPase, 2	Cytoplasm	other	bortezomib/cladribine/rituximab, bortezomib/sorafenib, bortezomib/paclitaxel, bortezomib/dexamethasone, bortezomib/dexamethasone/doxorubicin, bortezomib/dexamethasone/lenalidomide, bortezomib/dexamethasone/thalidomide, bortezomib/prednisone, bortezomib/doxorubicin, bortezomib/vorinostat, bortezomib/thalidomide, bortezomib/rituximab, bortezomib/dexamethasone/rituximab, bortezomib
-1,186	PSMD4		PSMD4	proteasome (prosome, macropain) 26S subunit, non-ATPase, 4	Cytoplasm	other
-1,259	PSMD7		PSMD7	proteasome (prosome, macropain) 26S subunit, non-ATPase, 7	Cytoplasm	other
-1,268	PSMG1		PSMG1	proteasome (prosome, macropain) assembly chaperone 1	Plasma Membrane	other
1,201	PSPHP1		PSPHP1	phosphoserine phosphatase pseudogene 1	Other	other
1,380	PTGES		PTGES	prostaglandin E synthase	Cytoplasm	enzyme
-1,169	PTGES3		PTGES3	prostaglandin E synthase 3 (cytosolic)	Cytoplasm	enzyme
1,158	PTMA		PTMA	prothymosin, alpha	Nucleus	other
-1,363	PTMS		PTMS	parathymosin	Nucleus	other
1,266	PTPRF		PTPRF	protein tyrosine phosphatase, receptor type, F	Plasma Membrane	phosphatase
-2,310	PTRF		PTRF	polymerase I and transcript release factor	Nucleus	transcription regulator
-1,163	PTTG1IP		PTTG1IP	pituitary tumor-transforming 1 interacting protein	Nucleus	other
-1,824	PYCARD		PYCARD	PYD and CARD domain containing	Cytoplasm	transcription regulator
1,370	PYCR1		PYCR1	pyrroline-5-carboxylate reductase 1	Cytoplasm	enzyme
-2,731	PYCR2		PYCR2	pyrroline-5-carboxylate reductase family, member 2	Cytoplasm	enzyme
-4,663	PYGL		PYGL	phosphorylase, glycogen, liver	Cytoplasm	enzyme
-1,986	PYURF		PYURF	PIGY upstream reading frame	Cytoplasm	other
1,361	QPRT		QPRT	quinolinate phosphoribosyltransferase	Cytoplasm	enzyme	atorvastatin/niacin, nicotinic acid/pioglitazone, nicotinic acid, lovastatin/niacin
-1,199	RAB10		RAB10	RAB10, member RAS oncogene family	Cytoplasm	enzyme
1,322	RAB13		RAB13	RAB13, member RAS oncogene family	Plasma Membrane	enzyme
-1,666	RAB31		RAB31	RAB31, member RAS oncogene family	Cytoplasm	enzyme
-1,149	RAB7A		RAB7A	RAB7A, member RAS oncogene family	Cytoplasm	enzyme
1,252	RALY		RALY	RALY heterogeneous nuclear ribonucleoprotein	Nucleus	other
-1,238	RAN		RAN	RAN, member RAS oncogene family	Nucleus	enzyme
-1,767	RANGRF		RANGRF	RAN guanine nucleotide release factor	Plasma Membrane	transporter
-1,148	RARRES1		RARRES1	retinoic acid receptor responder (tazarotene induced) 1	Plasma Membrane	other
1,811	RARRES3		RARRES3	retinoic acid receptor responder (tazarotene induced) 3	Cytoplasm	enzyme
-1,234	RARS		RARS	arginyl-tRNA synthetase	Cytoplasm	enzyme
3,123	RASSF10		RASSF10	Ras association (RalGDS/AF-6) domain family (N-terminal) member 10	Other	other
-1,233	RCN1		RCN1	reticulocalbin 1, EF-hand calcium binding domain	Cytoplasm	other
1,984	RDH10		RDH10	retinol dehydrogenase 10 (all-trans)	Nucleus	enzyme
-1,925	RELB		RELB	v-rel avian reticuloendotheliosis viral oncogene homolog B	Nucleus	transcription regulator
1,486	RERG		RERG	RAS-like, estrogen-regulated, growth inhibitor	Nucleus	enzyme
-1,385	RFC3		RFC3	replication factor C (activator 1) 3, 38kDa	Nucleus	enzyme
2,941	RGS2		RGS2	regulator of G-protein signaling 2	Nucleus	other
-1,187	RHEB		RHEB	Ras homolog enriched in brain	Cytoplasm	enzyme
-1,243	RHOA		RHOA	ras homolog family member A	Cytoplasm	enzyme
-1,335	RHOV		RHOV	ras homolog family member V	Plasma Membrane	enzyme
-1,313	RIPK4		RIPK4	receptor-interacting serine-threonine kinase 4	Nucleus	kinase
-1,430	RNF38		RNF38	ring finger protein 38	Nucleus	enzyme
-2,184	RPA1		RPA1	replication protein A1, 70kDa	Nucleus	other
1,218	RPL13		RPL13	ribosomal protein L13	Cytoplasm	other
1,167	RPL13A		RPL13A	ribosomal protein L13a	Cytoplasm	other
-2,842	RPL13P12		RPL13P12	ribosomal protein L13 pseudogene 12	Other	other
-1,100	RPL14		RPL14	ribosomal protein L14	Cytoplasm	other
3,949	RPL15P3		RPL15P3	ribosomal protein L15 pseudogene 3	Other	other
1,192	RPL18A		RPL18A	ribosomal protein L18a	Cytoplasm	other
-1,181	RPL36AL		RPL36AL	ribosomal protein L36a-like	Cytoplasm	other
-1,474	RPL39P5		RPL39P5	ribosomal protein L39 pseudogene 5	Other	other
1,225	RPLP1		RPLP1	ribosomal protein, large, P1	Cytoplasm	other
-2,346	RPP38		RPP38	ribonuclease P/MRP 38kDa subunit	Nucleus	enzyme
1,128	RPS12		RPS12	ribosomal protein S12	Cytoplasm	other
-1,067	RPS18		RPS18	ribosomal protein S18	Cytoplasm	other
-1,067	RPS18		RPS18	ribosomal protein S18	Cytoplasm	other
1,177	RPS2		RPS2	ribosomal protein S2	Cytoplasm	other
1,945	RPS28		RPS28	ribosomal protein S28	Cytoplasm	other
1,861	RPS3AP5		RPS3AP5	ribosomal protein S3A pseudogene 5	Other	other
1,120	RPS8		RPS8	ribosomal protein S8	Cytoplasm	other
-1,354	RTCA		RTCA	RNA 3'-terminal phosphate cyclase	Nucleus	enzyme
-1,275	C22orf28		RTCB	RNA 2',3'-cyclic phosphate and 5'-OH ligase	Cytoplasm	enzyme
-1,289	RTN4		RTN4	reticulon 4	Cytoplasm	other
-1,588	S100A10		S100A10	S100 calcium binding protein A10	Cytoplasm	other
1,122	S100A16		S100A16	S100 calcium binding protein A16	Nucleus	other
-1,364	S100A4		S100A4	S100 calcium binding protein A4	Cytoplasm	other
-1,079	S100A6		S100A6	S100 calcium binding protein A6	Cytoplasm	transporter
1,434	S100A7		S100A7	S100 calcium binding protein A7	Cytoplasm	other
1,565	S100A8		S100A8	S100 calcium binding protein A8	Cytoplasm	other
1,167	S100A9		S100A9	S100 calcium binding protein A9	Cytoplasm	other
-5,759	SAA2		SAA2	serum amyloid A2	Extracellular Space	other
-2,895	SAA2-SAA4		SAA2-SAA4	SAA2-SAA4 readthrough	Other	transporter
-10,558	SAA3P		SAA3P	serum amyloid A3 pseudogene	Other	other
-1,460	SAT1		SAT1	spermidine/spermine N1-acetyltransferase 1	Cytoplasm	enzyme
1,899	SCARA3		SCARA3	scavenger receptor class A, member 3	Plasma Membrane	transmembrane receptor
-1,428	SCCPDH		SCCPDH	saccharopine dehydrogenase (putative)	Cytoplasm	other
1,590	SCD		SCD	stearoyl-CoA desaturase (delta-9-desaturase)	Cytoplasm	enzyme
4,301	SCGB2A2		SCGB2A2	secretoglobin, family 2A, member 2	Extracellular Space	other
1,432	SDC4		SDC4	syndecan 4	Plasma Membrane	other
-1,886	SDCBP2		SDCBP2	syndecan binding protein (syntenin) 2	Cytoplasm	other
1,259	SEC61A1		SEC61A1	Sec61 alpha 1 subunit (S. cerevisiae)	Cytoplasm	transporter
-1,224	SEC61G		SEC61G	Sec61 gamma subunit	Plasma Membrane	transporter
1,828	SELENBP1		SELENBP1	selenium binding protein 1	Cytoplasm	other
-2,817	SEMA6B		SEMA6B	sema domain, transmembrane domain (TM), and cytoplasmic domain, (semaphorin) 6B	Plasma Membrane	other
-1,197	SEP15		SEP15	15 kDa selenoprotein	Cytoplasm	enzyme
2,536	SEPP1		SEPP1	selenoprotein P, plasma, 1	Extracellular Space	other
-3,818	SERPINA1		SERPINA1	serpin peptidase inhibitor, clade A (alpha-1 antiproteinase, antitrypsin), member 1	Extracellular Space	other
-3,129	SERPINA3		SERPINA3	serpin peptidase inhibitor, clade A (alpha-1 antiproteinase, antitrypsin), member 3	Extracellular Space	other
-1,282	SERPINB1		SERPINB1	serpin peptidase inhibitor, clade B (ovalbumin), member 1	Cytoplasm	other
-2,028	SERPINB2		SERPINB2	serpin peptidase inhibitor, clade B (ovalbumin), member 2	Extracellular Space	other
-56,952	SERPINB3		SERPINB3	serpin peptidase inhibitor, clade B (ovalbumin), member 3	Cytoplasm	other
-19,263	SERPINB4		SERPINB4	serpin peptidase inhibitor, clade B (ovalbumin), member 4	Cytoplasm	other
-1,756	SERPINB7		SERPINB7	serpin peptidase inhibitor, clade B (ovalbumin), member 7	Cytoplasm	other
-1,188	SET		SET	SET nuclear proto-oncogene	Nucleus	phosphatase
-1,268	SF3A1		SF3A1	splicing factor 3a, subunit 1, 120kDa	Nucleus	other
-1,199	SF3A3		SF3A3	splicing factor 3a, subunit 3, 60kDa	Nucleus	other
1,159	SF3B5		SF3B5	splicing factor 3b, subunit 5, 10kDa	Nucleus	other
1,319	SFRP1		SFRP1	secreted frizzled-related protein 1	Plasma Membrane	transmembrane receptor
-2,791	SFTA1P		SFTA1P	surfactant associated 1, pseudogene	Other	other
1,480	SGSM3		SGSM3	small G protein signaling modulator 3	Plasma Membrane	other
-1,220	SH3BGRL3		SH3BGRL3	SH3 domain binding glutamate-rich protein like 3	Nucleus	other
-4,656	SIRPG		SIRPG	signal-regulatory protein gamma	Plasma Membrane	other
1,500	SKA2		SKA2	spindle and kinetochore associated complex subunit 2	Nucleus	other
1,499	SLC12A2		SLC12A2	solute carrier family 12 (sodium/potassium/chloride transporter), member 2	Plasma Membrane	transporter	bumetanide, quinethazone
-2,461	SLC1A3		SLC1A3	solute carrier family 1 (glial high affinity glutamate transporter), member 3	Plasma Membrane	transporter	riluzole
1,248	SLC1A5		SLC1A5	solute carrier family 1 (neutral amino acid transporter), member 5	Plasma Membrane	transporter
1,154	SLC1A6		SLC1A6	solute carrier family 1 (high affinity aspartate/glutamate transporter), member 6	Plasma Membrane	transporter	riluzole
1,280	SLC25A6		SLC25A6	solute carrier family 25 (mitochondrial carrier; adenine nucleotide translocator), member 6	Cytoplasm	transporter	clodronic acid
1,447	SLC29A2		SLC29A2	solute carrier family 29 (equilibrative nucleoside transporter), member 2	Plasma Membrane	transporter
-1,503	SLC2A1		SLC2A1	solute carrier family 2 (facilitated glucose transporter), member 1	Plasma Membrane	transporter
-1,320	SLC35F2		SLC35F2	solute carrier family 35, member F2	Other	other
-1,334	SLC38A1		SLC38A1	solute carrier family 38, member 1	Plasma Membrane	transporter
-1,317	SLC38A2		SLC38A2	solute carrier family 38, member 2	Plasma Membrane	transporter
1,800	SLC39A11		SLC39A11	solute carrier family 39, member 11	Other	transporter
1,205	SLC39A7		SLC39A7	solute carrier family 39 (zinc transporter), member 7	Plasma Membrane	transporter
-1,571	SLC43A3		SLC43A3	solute carrier family 43, member 3	Extracellular Space	other
1,120	SLC44A2		SLC44A2	solute carrier family 44 (choline transporter), member 2	Extracellular Space	transporter
1,552	SLC4A11		SLC4A11	solute carrier family 4, sodium borate transporter, member 11	Plasma Membrane	transporter
-2,538	SLCO4A1		SLCO4A1	solute carrier organic anion transporter family, member 4A1	Plasma Membrane	transporter
1,230	SLPI		SLPI	secretory leukocyte peptidase inhibitor	Cytoplasm	other
-1,194	SMS		SMS	spermine synthase	Cytoplasm	enzyme
-1,112	SNRPB		SNRPB	small nuclear ribonucleoprotein polypeptides B and B1	Nucleus	other
-1,271	SNRPB2		SNRPB2	small nuclear ribonucleoprotein polypeptide B	Nucleus	other
-1,170	SNRPE		SNRPE	small nuclear ribonucleoprotein polypeptide E	Nucleus	other
-2,149	SOCS3		SOCS3	suppressor of cytokine signaling 3	Cytoplasm	phosphatase
-1,182	SOD1		SOD1	superoxide dismutase 1, soluble	Cytoplasm	enzyme
-1,416	SOD2		SOD2	superoxide dismutase 2, mitochondrial	Cytoplasm	enzyme
1,336	SORT1		SORT1	sortilin 1	Plasma Membrane	G-protein coupled receptor
1,565	SPDEF		SPDEF	SAM pointed domain containing ETS transcription factor	Nucleus	transcription regulator
-1,242	SQSTM1		SQSTM1	sequestosome 1	Cytoplasm	transcription regulator
1,848	SREBF1		SREBF1	sterol regulatory element binding transcription factor 1	Nucleus	transcription regulator
-1,272	SRI		SRI	sorcin	Cytoplasm	transporter
-1,295	SRXN1		SRXN1	sulfiredoxin 1	Cytoplasm	enzyme
4,151	STAC2		STAC2	SH3 and cysteine rich domain 2	Other	other
-1,283	STIP1		STIP1	stress-induced phosphoprotein 1	Cytoplasm	other
-1,128	STOML2		STOML2	stomatin (EPB72)-like 2	Plasma Membrane	other
-1,931	STRA6		STRA6	stimulated by retinoic acid 6	Plasma Membrane	other
-1,243	STRAP		STRAP	serine/threonine kinase receptor associated protein	Plasma Membrane	other
1,289	STT3B		STT3B	STT3B, subunit of the oligosaccharyltransferase complex (catalytic)	Cytoplasm	enzyme
-1,525	SUGT1		SUGT1	SGT1, suppressor of G2 allele of SKP1 (S. cerevisiae)	Nucleus	other
1,324	SUMF2		SUMF2	sulfatase modifying factor 2	Cytoplasm	other
-1,206	SUMO1		SUMO1	small ubiquitin-like modifier 1	Nucleus	enzyme
-1,605	SUSD2		SUSD2	sushi domain containing 2	Extracellular Space	other
-2,713	SUSD3		SUSD3	sushi domain containing 3	Other	other
-1,825	SUSD4		SUSD4	sushi domain containing 4	Other	other
1,241	SYNGR2		SYNGR2	synaptogyrin 2	Cytoplasm	other
-2,629	SYNPO		SYNPO	synaptopodin	Cytoplasm	other
-3,114	SYS1-DBNDD2		SYS1-DBNDD2	SYS1-DBNDD2 readthrough (NMD candidate)	Other	other
1,668	SYT12		SYT12	synaptotagmin XII	Plasma Membrane	transporter
-2,479	TAGLN		TAGLN	transgelin	Cytoplasm	other
-1,781	TAGLN2		TAGLN2	transgelin 2	Cytoplasm	other
-1,620	TBC1D2		TBC1D2	TBC1 domain family, member 2	Cytoplasm	other
-1,434	TBCB		TBCB	tubulin folding cofactor B	Other	other
-1,408	TCEAL3		TCEAL3	transcription elongation factor A (SII)-like 3	Other	other
1,408	TCF19		TCF19	transcription factor 19	Nucleus	transcription regulator
-1,282	TCP1		TCP1	t-complex 1	Cytoplasm	other
-1,282	TCP1		TCP1	t-complex 1	Cytoplasm	other
1,364	TEAD3		TEAD3	TEA domain family member 3	Nucleus	transcription regulator
2,112	TFCP2L1		TFCP2L1	transcription factor CP2-like 1	Nucleus	transcription regulator
-1,968	TGFB2		TGFB2	transforming growth factor, beta 2	Extracellular Space	growth factor	trabedersen
-2,076	TGFBI		TGFBI	transforming growth factor, beta-induced, 68kDa	Extracellular Space	other
-3,212	TGIF2-C20orf24		TGIF2-C20orf24	TGIF2-C20orf24 readthrough	Other	other
-3,662	THBS1		THBS1	thrombospondin 1	Extracellular Space	other
1,448	THEM6		THEM6	thioesterase superfamily member 6	Other	other
-1,278	TIMM17A		TIMM17A	translocase of inner mitochondrial membrane 17 homolog A (yeast)	Cytoplasm	transporter
-2,106	TIMP1		TIMP1	TIMP metallopeptidase inhibitor 1	Extracellular Space	cytokine
-3,122	TIMP2		TIMP2	TIMP metallopeptidase inhibitor 2	Extracellular Space	other
2,207	TLE3		TLE3	transducin-like enhancer of split 3	Nucleus	other
1,619	TM4SF1		TM4SF1	transmembrane 4 L six family member 1	Plasma Membrane	other
2,186	TMED7		TMED7	transmembrane emp24 protein transport domain containing 7	Cytoplasm	transporter
-1,389	TMEM14A		TMEM14A	transmembrane protein 14A	Other	other
-1,573	TMEM14B		TMEM14B	transmembrane protein 14B	Other	other
-1,263	TMEM14C		TMEM14C	transmembrane protein 14C	Plasma Membrane	other
-1,706	TMEM156		TMEM156	transmembrane protein 156	Other	other
-2,683	TMEM2		TMEM2	transmembrane protein 2	Cytoplasm	other
-1,331	TMEM205		TMEM205	transmembrane protein 205	Cytoplasm	other
1,602	TMEM254		TMEM254	transmembrane protein 254	Other	other
-1,275	TMEM45A		TMEM45A	transmembrane protein 45A	Plasma Membrane	other
-1,893	TMEM45B		TMEM45B	transmembrane protein 45B	Extracellular Space	other
1,290	TMEM54		TMEM54	transmembrane protein 54	Other	other
-1,034	TMSB10		TMSB10/TMSB4X	thymosin beta 10	Cytoplasm	other
-4,410	TNC		TNC	tenascin C	Extracellular Space	other
-6,027	TNF		TNF	tumor necrosis factor	Extracellular Space	cytokine	adalimumab, etanercept, infliximab, certolizumab, golimumab, infliximab/methotrexate, dexamethasone/thalidomide, dexamethasone/pomalidomide, cyclophosphamide/dexamethasone/thalidomide, golimumab/methotrexate, bortezomib/dexamethasone/thalidomide, rituximab/thalidomide, bortezomib/thalidomide, prednisone/thalidomide, adalimumab/methotrexate, pomalidomide, thalidomide
-2,092	TNFAIP2		TNFAIP2	tumor necrosis factor, alpha-induced protein 2	Extracellular Space	other
-3,211	TNFAIP3		TNFAIP3	tumor necrosis factor, alpha-induced protein 3	Nucleus	enzyme
-1,303	TNFRSF12A		TNFRSF12A	tumor necrosis factor receptor superfamily, member 12A	Plasma Membrane	transmembrane receptor
-2,324	TNFRSF21		TNFRSF21	tumor necrosis factor receptor superfamily, member 21	Plasma Membrane	transmembrane receptor
-1,537	TNFSF10		TNFSF10	tumor necrosis factor (ligand) superfamily, member 10	Extracellular Space	cytokine
-1,463	TNIP1		TNIP1	TNFAIP3 interacting protein 1	Nucleus	other
-1,975	TNS3		TNS3	tensin 3	Plasma Membrane	phosphatase
-1,190	TOMM20		TOMM20	translocase of outer mitochondrial membrane 20 homolog (yeast)	Cytoplasm	transporter
-1,329	TPI1		TPI1	triosephosphate isomerase 1	Cytoplasm	enzyme
-1,996	TPM1		TPM1	tropomyosin 1 (alpha)	Cytoplasm	other
2,100	TPM4		TPM4	tropomyosin 4	Cytoplasm	other
-1,113	TPT1		TPT1	tumor protein, translationally-controlled 1	Cytoplasm	other
1,427	TRAPPC5		TRAPPC5	trafficking protein particle complex 5	Cytoplasm	other
1,360	TRIB2		TRIB2	tribbles pseudokinase 2	Plasma Membrane	kinase
1,354	TRIB3		TRIB3	tribbles pseudokinase 3	Nucleus	kinase
-1,766	TRIM16L		TRIM16L	tripartite motif containing 16-like	Other	other
-1,336	TRIM29		TRIM29	tripartite motif containing 29	Cytoplasm	transcription regulator
-1,632	TRIM47		TRIM47	tripartite motif containing 47	Cytoplasm	other
-3,053	TRNP1		TRNP1	TMF1-regulated nuclear protein 1	Nucleus	other
1,492	TSC22D3		TSC22D3	TSC22 domain family, member 3	Nucleus	transcription regulator
-1,514	TSPAN1		TSPAN1	tetraspanin 1	Cytoplasm	transporter
-1,447	TSPAN15		TSPAN15	tetraspanin 15	Plasma Membrane	other
-1,435	TST		TST	thiosulfate sulfurtransferase (rhodanese)	Cytoplasm	enzyme
1,684	TSTD1		TSTD1	thiosulfate sulfurtransferase (rhodanese)-like domain containing 1	Cytoplasm	other
-1,325	TTC1		TTC1	tetratricopeptide repeat domain 1	Cytoplasm	other
-1,094	TUBA1B		TUBA1B	tubulin, alpha 1b	Cytoplasm	other
-1,222	TUBA1C		TUBA1C	tubulin, alpha 1c	Cytoplasm	other	epothilone B, colchicine/probenecid, larotaxel, eribulin, davunetide, vintafolide, milataxel, cevipabulin, gemcitabine/paclitaxel, docetaxel/prednisone, capecitabine/docetaxel, paclitaxel/trastuzumab, cyclophosphamide/prednisone/vincristine, docetaxel/hydrocortisone, cyclophosphamide/docetaxel, gemcitabine/vinorelbine, cyclophosphamide/daunorubicin/imatinib/prednisone/vincristine, cyclophosphamid…
-1,448	TUBB2A		TUBB2A	tubulin, beta 2A class IIa	Cytoplasm	other	epothilone B, colchicine/probenecid, larotaxel, ABT-751, eribulin, simotaxel, davunetide, vintafolide, milataxel, cevipabulin, brentuximab vedotin, cabazitaxel, gemcitabine/paclitaxel, docetaxel/prednisone, capecitabine/docetaxel, paclitaxel/trastuzumab, cyclophosphamide/prednisone/vincristine, docetaxel/hydrocortisone, cyclophosphamide/docetaxel, gemcitabine/vinorelbine, cyclophosphamide/daunoru…
-6,213	TUBB2B		TUBB2B	tubulin, beta 2B class IIb	Cytoplasm	other	brentuximab vedotin, cabazitaxel
-1,128	TUBB4B		TUBB4B	tubulin, beta 4B class IVb	Cytoplasm	other	epothilone B, colchicine/probenecid, larotaxel, ABT-751, eribulin, simotaxel, davunetide, vintafolide, milataxel, cevipabulin, brentuximab vedotin, cabazitaxel, gemcitabine/paclitaxel, docetaxel/prednisone, capecitabine/docetaxel, paclitaxel/trastuzumab, cyclophosphamide/prednisone/vincristine, docetaxel/hydrocortisone, cyclophosphamide/docetaxel, gemcitabine/vinorelbine, cyclophosphamide/daunoru…
-1,230	TXN		TXN	thioredoxin	Cytoplasm	enzyme
-1,261	TXNDC5		TXNDC5	thioredoxin domain containing 5 (endoplasmic reticulum)	Cytoplasm	enzyme
-1,284	UBA2		UBA2	ubiquitin-like modifier activating enzyme 2	Cytoplasm	enzyme
-1,215	UBB		UBB	ubiquitin B	Cytoplasm	enzyme
-1,160	UBC		UBC	ubiquitin C	Cytoplasm	enzyme
-1,292	UBE2C		UBE2C	ubiquitin-conjugating enzyme E2C	Cytoplasm	enzyme
-1,250	UBE2L3		UBE2L3	ubiquitin-conjugating enzyme E2L 3	Nucleus	enzyme
-1,234	UBE2L6		UBE2L6	ubiquitin-conjugating enzyme E2L 6	Cytoplasm	enzyme
-1,343	UBE2S		UBE2S	ubiquitin-conjugating enzyme E2S	Nucleus	enzyme
-1,839	UBE2V1		UBE2V1	ubiquitin-conjugating enzyme E2 variant 1	Nucleus	transcription regulator
-1,089	UBL5		UBL5	ubiquitin-like 5	Cytoplasm	other
-1,400	UBQLN1		UBQLN1	ubiquilin 1	Cytoplasm	other
-1,537	UCA1		UCA1	urothelial cancer associated 1 (non-protein coding)	Other	other
-3,004	UGCG		UGCG	UDP-glucose ceramide glucosyltransferase	Cytoplasm	enzyme	eliglustat, N-butyldeoxygalactonojirimycin, N-butyldeoxynojirimycin
-1,914	ULBP2		ULBP2	UL16 binding protein 2	Plasma Membrane	transmembrane receptor
-1,439	UPP1		UPP1	uridine phosphorylase 1	Cytoplasm	enzyme
-1,178	UQCRFS1		UQCRFS1	ubiquinol-cytochrome c reductase, Rieske iron-sulfur polypeptide 1	Cytoplasm	enzyme
-1,365	USP14		USP14	ubiquitin specific peptidase 14 (tRNA-guanine transglycosylase)	Cytoplasm	peptidase
-1,290	UTP11L		UTP11L	UTP11-like, U3 small nucleolar ribonucleoprotein (yeast)	Nucleus	other
-1,765	VAMP3		VAMP3	vesicle-associated membrane protein 3	Plasma Membrane	other
-1,272	VCL		VCL	vinculin	Plasma Membrane	enzyme
-1,109	VCP		VCP	valosin containing protein	Cytoplasm	enzyme
-1,303	VDAC1		VDAC1	voltage-dependent anion channel 1	Cytoplasm	ion channel
-1,310	VDAC2		VDAC2	voltage-dependent anion channel 2	Cytoplasm	ion channel
1,435	VGLL1		VGLL1	vestigial-like family member 1	Nucleus	transcription regulator
2,786	VIM		VIM	vimentin	Cytoplasm	other
1,675	VIPR1		VIPR1	vasoactive intestinal peptide receptor 1	Plasma Membrane	G-protein coupled receptor
1,236	VOPP1		VOPP1	vesicular, overexpressed in cancer, prosurvival protein 1	Nucleus	other
1,835	VTCN1		VTCN1	V-set domain containing T cell activation inhibitor 1	Plasma Membrane	other
1,367	WDR34		WDR34	WD repeat domain 34	Cytoplasm	other
-1,602	WLS		WLS	wntless Wnt ligand secretion mediator	Cytoplasm	other
-2,613	WNT4		WNT4	wingless-type MMTV integration site family, member 4	Extracellular Space	cytokine
-1,286	WWC1		WWC1	WW and C2 domain containing 1	Cytoplasm	transcription regulator
1,903	XBP1		XBP1	X-box binding protein 1	Nucleus	transcription regulator
-1,151	XRCC6		XRCC6	X-ray repair complementing defective repair in Chinese hamster cells 6	Nucleus	enzyme
-1,070	YBX1		YBX1	Y box binding protein 1	Nucleus	transcription regulator
2,337	YBX2		YBX2	Y box binding protein 2	Cytoplasm	translation regulator
-1,119	YWHAE		YWHAE	tyrosine 3-monooxygenase/tryptophan 5-monooxygenase activation protein, epsilon	Cytoplasm	other
-1,317	YWHAH		YWHAH	tyrosine 3-monooxygenase/tryptophan 5-monooxygenase activation protein, eta	Cytoplasm	transcription regulator
-1,109	YWHAQ		YWHAQ	tyrosine 3-monooxygenase/tryptophan 5-monooxygenase activation protein, theta	Cytoplasm	other
-1,227	YWHAZ		YWHAZ	tyrosine 3-monooxygenase/tryptophan 5-monooxygenase activation protein, zeta	Cytoplasm	enzyme
1,628	ZW10		ZW10	zw10 kinetochore protein	Nucleus	other
-2,423	ZYX		ZYX	zyxin	Plasma Membrane	other

## Sheet: SI_C _LNCaP si vs scr Nx
© 2000-2015 QIAGEN. All rights reserved.
Fold-change	ID	Notes	Symbol	Entrez Gene Name	Location	Type(s)	Drug(s)
-1,480	AADAT		AADAT	aminoadipate aminotransferase	Cytoplasm	enzyme
1,172	ABCC4		ABCC4	ATP-binding cassette, sub-family C (CFTR/MRP), member 4	Plasma Membrane	transporter
1,850	ABHD14A-ACY1		ABHD14A-ACY1	ABHD14A-ACY1 readthrough (NMD candidate)	Other	other
1,153	ABHD2		ABHD2	abhydrolase domain containing 2	Other	enzyme
-1,594	CXCR7		ACKR3	atypical chemokine receptor 3	Plasma Membrane	G-protein coupled receptor
1,625	ACPP		ACPP	acid phosphatase, prostate	Extracellular Space	phosphatase
1,217	ACSL3		ACSL3	acyl-CoA synthetase long-chain family member 3	Cytoplasm	enzyme
-1,124	ACTG1		ACTG1	actin gamma 1	Cytoplasm	other
-1,473	ACY1		ACY1	aminoacylase 1	Cytoplasm	peptidase
-2,122	ADAM7		ADAM7	ADAM metallopeptidase domain 7	Plasma Membrane	peptidase
2,248	ADAMTS1		ADAMTS1	ADAM metallopeptidase with thrombospondin type 1 motif, 1	Extracellular Space	peptidase
3,943	ADRA2A		ADRA2A	adrenoceptor alpha 2A	Plasma Membrane	G-protein coupled receptor	paliperidone, risperidone, antazoline/naphazoline, acetaminophen/clemastine/pseudoephedrine, articaine/epinephrine, bupivacaine/epinephrine, caffeine/ergotamine, acetaminophen/dexbrompheniramine/pseudoephedrine, dapiprazole, dexbrompheniramine/pseudoephedrine, chlorpheniramine/ibuprofen/pseudoephedrine, dipivefrin, cetirizine/pseudoephedrine, asenapine, epinephrine/prilocaine, epinephrine/lidocai…
1,391	AES		AES	amino-terminal enhancer of split	Nucleus	transcription regulator
-1,274	AHCY		AHCY	adenosylhomocysteinase	Cytoplasm	enzyme	9-(2',3'-dihydroxycyclopent-4'-enyl)adenine, 3-deazaneplanocin, neplanocin A, 3-deazaaristeromycin, cyanovirin-N, 6'-C-methylneplanocin A
1,516	AHNAK		AHNAK	AHNAK nucleoprotein	Nucleus	other
1,307	AIDA		AIDA	axin interactor, dorsalization associated	Cytoplasm	other
-1,546	AK2		AK2	adenylate kinase 2	Cytoplasm	kinase
1,928	ALCAM		ALCAM	activated leukocyte cell adhesion molecule	Plasma Membrane	other
1,908	AMACR		AMACR	alpha-methylacyl-CoA racemase	Cytoplasm	enzyme
1,262	AMD1		AMD1	adenosylmethionine decarboxylase 1	Cytoplasm	enzyme
-1,209	APEX1		APEX1	APEX nuclease (multifunctional DNA repair enzyme) 1	Nucleus	enzyme
2,083	APH1B		APH1B	APH1B gamma secretase subunit	Other	peptidase
-1,325	APRT		APRT	adenine phosphoribosyltransferase	Cytoplasm	enzyme
1,473	KIAA1244		ARFGEF3	ARFGEF family member 3	Other	other
1,216	ARG2		ARG2	arginase 2	Cytoplasm	enzyme
1,424	ARHGAP29		ARHGAP29	Rho GTPase activating protein 29	Cytoplasm	other
1,672	ARHGEF37		ARHGEF37	Rho guanine nucleotide exchange factor (GEF) 37	Other	other
1,196	ARL6IP1		ARL6IP1	ADP-ribosylation factor-like 6 interacting protein 1	Cytoplasm	other
-1,283	ARPP19		ARPP19	cAMP-regulated phosphoprotein, 19kDa	Cytoplasm	transporter
-3,276	ARSI		ARSI	arylsulfatase family, member I	Extracellular Space	enzyme
1,247	ASAH1		ASAH1	N-acylsphingosine amidohydrolase (acid ceramidase) 1	Cytoplasm	enzyme
-1,258	ASNA1		ASNA1	arsA arsenite transporter, ATP-binding, homolog 1 (bacterial)	Nucleus	transporter
-1,339	ATF4		ATF4	activating transcription factor 4	Nucleus	transcription regulator
-1,255	ATP1B1		ATP1B1	ATPase, Na+/K+ transporting, beta 1 polypeptide	Plasma Membrane	transporter
-1,446	ATP2A2		ATP2A2	ATPase, Ca++ transporting, cardiac muscle, slow twitch 2	Cytoplasm	transporter
1,551	ATP2C1		ATP2C1	ATPase, Ca++ transporting, type 2C, member 1	Cytoplasm	transporter	sevoflurane, isoflurane, desflurane, enflurane, Ca2+
-1,305	ATP5B		ATP5B	ATP synthase, H+ transporting, mitochondrial F1 complex, beta polypeptide	Cytoplasm	transporter
-1,362	ATP5D		ATP5D	ATP synthase, H+ transporting, mitochondrial F1 complex, delta subunit	Cytoplasm	transporter
-1,382	ATP5G1		ATP5G1	ATP synthase, H+ transporting, mitochondrial Fo complex, subunit C1 (subunit 9)	Cytoplasm	transporter
1,189	ATP6V1G1		ATP6V1G1	ATPase, H+ transporting, lysosomal 13kDa, V1 subunit G1	Cytoplasm	transporter
-1,438	ATP6V1G2-DDX39B		ATP6V1G2-DDX39B	ATP6V1G2-DDX39B readthrough (NMD candidate)	Other	other
1,589	ATP9A		ATP9A	ATPase, class II, type 9A	Cytoplasm	transporter
-1,295	AURKAIP1		AURKAIP1	aurora kinase A interacting protein 1	Nucleus	enzyme
1,756	B2M		B2M	beta-2-microglobulin	Plasma Membrane	transmembrane receptor
3,242	BAG5		BAG5	BCL2-associated athanogene 5	Cytoplasm	other
-1,389	BAMBI		BAMBI	BMP and activin membrane-bound inhibitor	Plasma Membrane	other
1,837	BCHE		BCHE	butyrylcholinesterase	Plasma Membrane	enzyme	dipivefrin, malathion, atropine/edrophonium, echothiophate, tacrine, edrophonium, isoflurophate, pyridostigmine, pralidoxime, rivastigmine
1,546	BCL2L1		BCL2L1	BCL2-like 1	Cytoplasm	other
1,593	BCL7B		BCL7B	B-cell CLL/lymphoma 7B	Other	other
2,147	BMPR1B		BMPR1B	bone morphogenetic protein receptor, type IB	Plasma Membrane	kinase
-1,300	BNIP3		BNIP3	BCL2/adenovirus E1B 19kDa interacting protein 3	Cytoplasm	other
1,136	BRK1		BRK1	BRICK1, SCAR/WAVE actin-nucleating complex subunit	Cytoplasm	other
-1,281	BTF3		BTF3	basic transcription factor 3	Nucleus	transcription regulator
1,514	BTG1		BTG1	B-cell translocation gene 1, anti-proliferative	Nucleus	transcription regulator
-1,251	BZW1		BZW1	basic leucine zipper and W2 domains 1	Cytoplasm	translation regulator
1,272	C18orf32		C18orf32	chromosome 18 open reading frame 32	Other	other
-1,307	C19orf53		C19orf53	chromosome 19 open reading frame 53	Other	other
1,349	C1orf116		C1orf116	chromosome 1 open reading frame 116	Cytoplasm	other
-1,171	C1QBP		C1QBP	complement component 1, q subcomponent binding protein	Cytoplasm	transcription regulator
1,420	C1QTNF3		C1QTNF3	C1q and tumor necrosis factor related protein 3	Extracellular Space	other
-3,074	C21orf59		C21orf59	chromosome 21 open reading frame 59	Cytoplasm	other
1,411	C5orf30		C5orf30	chromosome 5 open reading frame 30	Cytoplasm	other
4,232	C6orf47		C6orf47	chromosome 6 open reading frame 47	Cytoplasm	other
1,412	CAB39L		CAB39L	calcium binding protein 39-like	Cytoplasm	kinase
1,151	CALD1		CALD1	caldesmon 1	Cytoplasm	other
2,219	CAMK2N1		CAMK2N1	calcium/calmodulin-dependent protein kinase II inhibitor 1	Plasma Membrane	kinase
-1,614	CBFB		CBFB	core-binding factor, beta subunit	Nucleus	transcription regulator
-1,219	CBX3		CBX3	chromobox homolog 3	Nucleus	transcription regulator
-1,327	CCNB1		CCNB1	cyclin B1	Cytoplasm	kinase
-1,263	CCND1		CCND1	cyclin D1	Nucleus	transcription regulator	arsenic trioxide/tretinoin, arsenic trioxide/daunorubicin/tretinoin, arsenic trioxide/gemtuzumab ozogamicin/tretinoin, arsenic trioxide/idarubicin/tretinoin, arsenic trioxide
-1,301	CCT3		CCT3	chaperonin containing TCP1, subunit 3 (gamma)	Cytoplasm	other
-1,242	CCT6A		CCT6A	chaperonin containing TCP1, subunit 6A (zeta 1)	Cytoplasm	other
-1,274	CCT7		CCT7	chaperonin containing TCP1, subunit 7 (eta)	Cytoplasm	other
1,743	CD47		CD47	CD47 molecule	Plasma Membrane	transmembrane receptor
1,195	CD63		CD63	CD63 molecule	Plasma Membrane	other
1,327	CD9		CD9	CD9 molecule	Plasma Membrane	other
-1,238	CDKN1A		CDKN1A	cyclin-dependent kinase inhibitor 1A (p21, Cip1)	Nucleus	kinase
1,303	CERS6		CERS6	ceramide synthase 6	Nucleus	transcription regulator
-1,343	CHCHD10		CHCHD10	coiled-coil-helix-coiled-coil-helix domain containing 10	Cytoplasm	other
-1,227	CHCHD2		CHCHD2	coiled-coil-helix-coiled-coil-helix domain containing 2	Cytoplasm	other
1,837	CHST14		CHST14	carbohydrate (N-acetylgalactosamine 4-0) sulfotransferase 14	Cytoplasm	enzyme
-1,144	CKB		CKB	creatine kinase, brain	Cytoplasm	kinase
-1,458	CKS2		CKS2	CDC28 protein kinase regulatory subunit 2	Other	kinase
2,063	CLEC7A		CLEC7A	C-type lectin domain family 7, member A	Plasma Membrane	transmembrane receptor
-2,778	CLU		CLU	clusterin	Cytoplasm	other
1,261	CMBL		CMBL	carboxymethylenebutenolidase homolog (Pseudomonas)	Cytoplasm	enzyme
1,442	CMTM6		CMTM6	CKLF-like MARVEL transmembrane domain containing 6	Extracellular Space	cytokine
-1,192	COX6A1		COX6A1	cytochrome c oxidase subunit VIa polypeptide 1	Cytoplasm	enzyme
-1,170	COX8A		COX8A	cytochrome c oxidase subunit VIIIA (ubiquitous)	Cytoplasm	enzyme
1,285	CREB3L4		CREB3L4	cAMP responsive element binding protein 3-like 4	Nucleus	transcription regulator
1,640	CREBL2		CREBL2	cAMP responsive element binding protein-like 2	Nucleus	transcription regulator
3,647	CRISP3		CRISP3	cysteine-rich secretory protein 3	Extracellular Space	other
2,333	CSAG2		CSAG2/CSAG3	CSAG family, member 3	Other	other
1,201	CSNK1A1		CSNK1A1	casein kinase 1, alpha 1	Cytoplasm	kinase
2,155	CTSO		CTSO	cathepsin O	Cytoplasm	peptidase
2,682	CWH43		CWH43	cell wall biogenesis 43 C-terminal homolog (S. cerevisiae)	Other	other
-1,472	CYC1		CYC1	cytochrome c-1	Cytoplasm	enzyme
1,832	CYP2J2		CYP2J2	cytochrome P450, family 2, subfamily J, polypeptide 2	Cytoplasm	enzyme
1,619	CYTH1		CYTH1	cytohesin 1	Cytoplasm	other
-1,217	DAD1		DAD1	defender against cell death 1	Cytoplasm	other
-1,273	DANCR		DANCR	differentiation antagonizing non-protein coding RNA	Other	other
-1,273	DANCR		DANCR	differentiation antagonizing non-protein coding RNA	Other	other
1,272	DBI		DBI	diazepam binding inhibitor (GABA receptor modulator, acyl-CoA binding protein)	Cytoplasm	other
1,239	DCAF6		DCAF6	DDB1 and CUL4 associated factor 6	Nucleus	transcription regulator
-1,462	DCTPP1		DCTPP1	dCTP pyrophosphatase 1	Cytoplasm	enzyme
1,360	DDAH1		DDAH1	dimethylarginine dimethylaminohydrolase 1	Cytoplasm	enzyme
-1,344	DDIT4		DDIT4	DNA-damage-inducible transcript 4	Cytoplasm	other
-1,278	DDX21		DDX21	DEAD (Asp-Glu-Ala-Asp) box helicase 21	Nucleus	enzyme
-2,417	DDX47		DDX47	DEAD (Asp-Glu-Ala-Asp) box polypeptide 47	Nucleus	enzyme
2,029	DEFB132		DEFB132	defensin, beta 132	Extracellular Space	other
1,119	DHCR24		DHCR24	24-dehydrocholesterol reductase	Cytoplasm	enzyme
1,452	DHRS7		DHRS7	dehydrogenase/reductase (SDR family) member 7	Other	enzyme
2,128	DIO1		DIO1	deiodinase, iodothyronine, type I	Cytoplasm	enzyme	propylthiouracil
7,568	DIO3		DIO3	deiodinase, iodothyronine, type III	Plasma Membrane	enzyme
-1,420	DSC2		DSC2	desmocollin 2	Plasma Membrane	other
1,299	DSEL		DSEL	dermatan sulfate epimerase-like	Extracellular Space	enzyme
1,199	DSTN		DSTN	destrin (actin depolymerizing factor)	Cytoplasm	other
1,502	DUSP3		DUSP3	dual specificity phosphatase 3	Cytoplasm	phosphatase
1,173	DYNLL2		DYNLL2	dynein, light chain, LC8-type 2	Cytoplasm	other
4,231	DYX1C1-CCPG1		DYX1C1-CCPG1	DYX1C1-CCPG1 readthrough (NMD candidate)	Other	other
1,827	EAF2		EAF2	ELL associated factor 2	Nucleus	transcription regulator
1,114	ECH1		ECH1	enoyl CoA hydratase 1, peroxisomal	Cytoplasm	enzyme
-1,204	EDF1		EDF1	endothelial differentiation-related factor 1	Nucleus	transcription regulator
-1,089	EEF1A1		EEF1A1	eukaryotic translation elongation factor 1 alpha 1	Cytoplasm	translation regulator
-1,260	EEF1A2		EEF1A2	eukaryotic translation elongation factor 1 alpha 2	Cytoplasm	translation regulator
-1,412	EEF1B2		EEF1B2	eukaryotic translation elongation factor 1 beta 2	Cytoplasm	translation regulator
-1,292	EEF2		EEF2	eukaryotic translation elongation factor 2	Cytoplasm	translation regulator
1,294	EFCAB14		EFCAB14	EF-hand calcium binding domain 14	Other	other
1,430	EFNA5		EFNA5	ephrin-A5	Plasma Membrane	kinase
2,036	EFNB2		EFNB2	ephrin-B2	Plasma Membrane	other
-9,567	EID1		EID1	EP300 interacting inhibitor of differentiation 1	Nucleus	transcription regulator
-1,304	EIF3D		EIF3D	eukaryotic translation initiation factor 3, subunit D	Cytoplasm	other
-1,319	EIF3E		EIF3E	eukaryotic translation initiation factor 3, subunit E	Cytoplasm	other
-1,437	EIF4B		EIF4B	eukaryotic translation initiation factor 4B	Cytoplasm	translation regulator
-1,406	EIF4EBP1		EIF4EBP1	eukaryotic translation initiation factor 4E binding protein 1	Cytoplasm	translation regulator
-1,213	EIF4H		EIF4H	eukaryotic translation initiation factor 4H	Cytoplasm	translation regulator
-1,345	EIF5A		EIF5A	eukaryotic translation initiation factor 5A	Cytoplasm	translation regulator
-1,315	EIF6		EIF6	eukaryotic translation initiation factor 6	Cytoplasm	translation regulator
1,499	ELK4		ELK4	ELK4, ETS-domain protein (SRF accessory protein 1)	Nucleus	transcription regulator
1,529	ELL2		ELL2	elongation factor, RNA polymerase II, 2	Nucleus	transcription regulator
1,394	ELOVL5		ELOVL5	ELOVL fatty acid elongase 5	Cytoplasm	enzyme
1,559	EMC6		EMC6	ER membrane protein complex subunit 6	Cytoplasm	other
1,125	ENDOD1		ENDOD1	endonuclease domain containing 1	Extracellular Space	enzyme
-1,362	ENO1		ENO1	enolase 1, (alpha)	Cytoplasm	enzyme
2,443	ENPP5		ENPP5	ectonucleotide pyrophosphatase/phosphodiesterase 5 (putative)	Extracellular Space	enzyme
1,185	EPHX1		EPHX1	epoxide hydrolase 1, microsomal (xenobiotic)	Cytoplasm	peptidase
1,558	ERVK3-1		ERVK3-1	endogenous retrovirus group K3, member 1	Other	other
1,673	ETV1		ETV1	ets variant 1	Nucleus	transcription regulator
1,393	FAM111A		FAM111A	family with sequence similarity 111, member A	Nucleus	other
1,356	FAM127A		FAM127A	family with sequence similarity 127, member A	Plasma Membrane	other
-1,544	FAM198B		FAM198B	family with sequence similarity 198, member B	Cytoplasm	other
1,280	FAM32A		FAM32A	family with sequence similarity 32, member A	Nucleus	other
1,439	FAM35A		FAM35A	family with sequence similarity 35, member A	Extracellular Space	other
-1,406	FARSA		FARSA	phenylalanyl-tRNA synthetase, alpha subunit	Cytoplasm	enzyme
-1,179	FASN		FASN	fatty acid synthase	Cytoplasm	enzyme	orlistat, cerulenin
-1,355	FAU		FAU	Finkel-Biskis-Reilly murine sarcoma virus (FBR-MuSV) ubiquitously expressed	Cytoplasm	other
-1,391	FBL		FBL	fibrillarin	Nucleus	other
1,332	FBXL17		FBXL17	F-box and leucine-rich repeat protein 17	Other	other
-14,874	FDXACB1		FDXACB1	ferredoxin-fold anticodon binding domain containing 1	Other	other
1,175	FECH		FECH	ferrochelatase	Cytoplasm	enzyme
-2,200	FEM1A		FEM1A	fem-1 homolog a (C. elegans)	Nucleus	transcription regulator
1,584	FGFRL1		FGFRL1	fibroblast growth factor receptor-like 1	Plasma Membrane	transmembrane receptor
-1,262	FKBP4		FKBP4	FK506 binding protein 4, 59kDa	Nucleus	enzyme
1,359	FKBP5		FKBP5	FK506 binding protein 5	Nucleus	enzyme
1,421	FOLH1		FOLH1	folate hydrolase (prostate-specific membrane antigen) 1	Plasma Membrane	peptidase	capromab pendetide
1,174	FOXA1		FOXA1	forkhead box A1	Nucleus	transcription regulator
1,455	FXYD3		FXYD3	FXYD domain containing ion transport regulator 3	Plasma Membrane	other
1,362	G3BP2		G3BP2	GTPase activating protein (SH3 domain) binding protein 2	Cytoplasm	enzyme
-5,518	GAGE12I	D	GAGE1 (includes others)	G antigen 1	Other	other
2,764	GAGE12H	D	GAGE1 (includes others)	G antigen 1	Other	other
3,284	GAGE13		GAGE13 (includes others)	G antigen 2D	Other	other
2,377	GALNT10		GALNT10	polypeptide N-acetylgalactosaminyltransferase 10	Cytoplasm	enzyme
1,238	GANAB		GANAB	glucosidase, alpha; neutral AB	Cytoplasm	enzyme	miglitol
-1,231	GAPDH		GAPDH	glyceraldehyde-3-phosphate dehydrogenase	Cytoplasm	enzyme
-1,290	GDF15		GDF15	growth differentiation factor 15	Extracellular Space	growth factor
1,130	GHITM		GHITM	growth hormone inducible transmembrane protein	Cytoplasm	other
1,707	GK5		GK5	glycerol kinase 5 (putative)	Other	kinase
9,362	GLYATL3		GLYATL3	glycine-N-acyltransferase-like 3	Other	other
-1,251	GNB2L1		GNB2L1	guanine nucleotide binding protein (G protein), beta polypeptide 2-like 1	Cytoplasm	enzyme
1,207	GOLPH3		GOLPH3	golgi phosphoprotein 3 (coat-protein)	Cytoplasm	other
2,912	GPC5-AS1		GPC5-AS1	GPC5 antisense RNA 1	Other	other
4,800	GPNMB		GPNMB	glycoprotein (transmembrane) nmb	Plasma Membrane	enzyme
1,688	GPR137B		GPR137B	G protein-coupled receptor 137B	Plasma Membrane	other
4,927	GRIN3A		GRIN3A	glutamate receptor, ionotropic, N-methyl-D-aspartate 3A	Plasma Membrane	ion channel	dextromethorphan/morphine, neramexane, bicifadine, delucemine, nebostinel, besonprodil, UK-240455, tenocyclidine, dextromethorphan/quinidine, caffeine/ethanol, amitriptyline/ketamine, donepezil/memantine, ethopropazine, ketamine, phencyclidine, amantadine, felbamate, methadone, ethanol, memantine, orphenadrine, cycloserine, aspirin/caffeine/orphenadrine, N-(2-indanyl)glycinamide, procaine, dextro…
1,845	GSTA1		GSTA1	glutathione S-transferase alpha 1	Cytoplasm	enzyme
1,245	GTF3C6		GTF3C6	general transcription factor IIIC, polypeptide 6, alpha 35kDa	Nucleus	transcription regulator
1,757	GUCY1A3		GUCY1A3	guanylate cyclase 1, soluble, alpha 3	Cytoplasm	enzyme	nitroglycerin, isosorbide-5-mononitrate, isosorbide dinitrate, nitroprusside
1,394	H1F0		H1F0	H1 histone family, member 0	Nucleus	other
-1,164	H3F3B		H3F3A/H3F3B	H3 histone, family 3A	Nucleus	other
1,310	PTPLB		HACD2	3-hydroxyacyl-CoA dehydratase 2	Cytoplasm	phosphatase
1,281	HADHB		HADHB	hydroxyacyl-CoA dehydrogenase/3-ketoacyl-CoA thiolase/enoyl-CoA hydratase (trifunctional protein), beta subunit	Cytoplasm	enzyme
-1,290	HERC3		HERC3	HECT and RLD domain containing E3 ubiquitin protein ligase 3	Cytoplasm	enzyme
-1,851	HES6		HES6	hes family bHLH transcription factor 6	Nucleus	transcription regulator
1,255	HIBADH		HIBADH	3-hydroxyisobutyrate dehydrogenase	Cytoplasm	enzyme
1,184	HIST1H1C		HIST1H1C	histone cluster 1, H1c	Nucleus	other
1,203	HIST1H2AC		HIST1H2AC	histone cluster 1, H2ac	Nucleus	other
1,582	HIST1H2BC		HIST1H2BC	histone cluster 1, H2bc	Nucleus	other
1,992	HIST1H2BD		HIST1H2BD	histone cluster 1, H2bd	Nucleus	other
1,842	HIST2H2AA4		HIST2H2AA3/HIST2H2AA4	histone cluster 2, H2aa3	Nucleus	other
1,763	HIST2H4B		HIST2H4B	histone cluster 2, H4b	Nucleus	other
1,565	HLA-A		HLA-A	major histocompatibility complex, class I, A	Plasma Membrane	other
1,777	HLA-B		HLA-B	major histocompatibility complex, class I, B	Plasma Membrane	transmembrane receptor
1,777	HLA-B		HLA-B	major histocompatibility complex, class I, B	Plasma Membrane	transmembrane receptor
1,370	HLA-C		HLA-C	major histocompatibility complex, class I, C	Plasma Membrane	other
-1,620	HMGA1		HMGA1	high mobility group AT-hook 1	Nucleus	transcription regulator
-1,304	HMGB1		HMGB1	high mobility group box 1	Nucleus	transcription regulator
-1,495	HMGCS2		HMGCS2	3-hydroxy-3-methylglutaryl-CoA synthase 2 (mitochondrial)	Cytoplasm	enzyme
1,178	HN1L		HN1L	hematological and neurological expressed 1-like	Cytoplasm	other
3,744	HPGD		HPGD	hydroxyprostaglandin dehydrogenase 15-(NAD)	Cytoplasm	enzyme
-2,180	HSD11B2		HSD11B2	hydroxysteroid (11-beta) dehydrogenase 2	Cytoplasm	enzyme
-1,275	HSD17B10		HSD17B10	hydroxysteroid (17-beta) dehydrogenase 10	Cytoplasm	enzyme
1,303	HSD17B4		HSD17B4	hydroxysteroid (17-beta) dehydrogenase 4	Cytoplasm	enzyme
-1,203	HSP90AA1		HSP90AA1	heat shock protein 90kDa alpha (cytosolic), class A member 1	Cytoplasm	enzyme	alvespimycin, retaspimycin, luminespib, cisplatin
-1,198	HSP90AB1		HSP90AB1	heat shock protein 90kDa alpha (cytosolic), class B member 1	Cytoplasm	enzyme	alvespimycin, retaspimycin, cisplatin
-1,291	HSPA1B		HSPA1A/HSPA1B	heat shock 70kDa protein 1A	Cytoplasm	enzyme
-1,148	HSPA5		HSPA5	heat shock 70kDa protein 5 (glucose-regulated protein, 78kDa)	Cytoplasm	enzyme
-1,166	HSPA8		HSPA8	heat shock 70kDa protein 8	Cytoplasm	enzyme
-1,468	HSPB1		HSPB1	heat shock 27kDa protein 1	Cytoplasm	other
-1,198	HSPD1		HSPD1	heat shock 60kDa protein 1 (chaperonin)	Cytoplasm	enzyme
1,576	ID3		ID3	inhibitor of DNA binding 3, dominant negative helix-loop-helix protein	Nucleus	transcription regulator
1,415	IDH1		IDH1	isocitrate dehydrogenase 1 (NADP+), soluble	Cytoplasm	enzyme
-1,405	IDH3B		IDH3B	isocitrate dehydrogenase 3 (NAD+) beta	Cytoplasm	enzyme
1,412	IDI1		IDI1	isopentenyl-diphosphate delta isomerase 1	Cytoplasm	enzyme
1,765	IFI6		IFI6	interferon, alpha-inducible protein 6	Cytoplasm	other
1,711	IFT57		IFT57	intraflagellar transport 57	Cytoplasm	other
1,303	IGF2R		IGF2R	insulin-like growth factor 2 receptor	Plasma Membrane	transmembrane receptor
-1,252	ILF2		ILF2	interleukin enhancer binding factor 2	Nucleus	transcription regulator
-1,452	IMP4		IMP4	IMP4, U3 small nucleolar ribonucleoprotein	Nucleus	other
-1,187	IMPDH2		IMPDH2	IMP (inosine 5'-monophosphate) dehydrogenase 2	Cytoplasm	enzyme	thioguanine, VX-944, pegintron/ribavirin, interferon alfa-2b/ribavirin, mycophenolate mofetil, mycophenolic acid, ribavirin
1,219	IRAK1		IRAK1	interleukin-1 receptor-associated kinase 1	Plasma Membrane	kinase
1,310	ITM2B		ITM2B	integral membrane protein 2B	Plasma Membrane	other
1,605	KIAA1522		KIAA1522	KIAA1522	Other	other
1,514	KIAA1598		KIAA1598	KIAA1598	Plasma Membrane	other
2,423	KITLG		KITLG	KIT ligand	Extracellular Space	growth factor
-1,225	KLK2		KLK2	kallikrein-related peptidase 2	Extracellular Space	peptidase
1,543	KLK4		KLK4	kallikrein-related peptidase 4	Extracellular Space	peptidase
-1,213	KPNA2		KPNA2	karyopherin alpha 2 (RAG cohort 1, importin alpha 1)	Nucleus	transporter
1,667	KRCC1		KRCC1	lysine-rich coiled-coil 1	Extracellular Space	other
8,233	KRT20		KRT20	keratin 20, type I	Cytoplasm	other
-1,726	LAMA3		LAMA3	laminin, alpha 3	Extracellular Space	other
1,351	LAMC1		LAMC1	laminin, gamma 1 (formerly LAMB2)	Extracellular Space	other
1,287	LCP1		LCP1	lymphocyte cytosolic protein 1 (L-plastin)	Cytoplasm	other
-1,361	LDHA		LDHA	lactate dehydrogenase A	Cytoplasm	enzyme
2,008	LINC00849		LINC00849	long intergenic non-protein coding RNA 849	Other	other
2,205	LPAL2		LPAL2	lipoprotein, Lp(a)-like 2, pseudogene	Other	other
-1,820	LPAR3		LPAR3	lysophosphatidic acid receptor 3	Plasma Membrane	G-protein coupled receptor
1,988	LTN1		LTN1	listerin E3 ubiquitin protein ligase 1	Nucleus	enzyme
1,420	LUZP2		LUZP2	leucine zipper protein 2	Other	other
-1,585	LYPLA2		LYPLA2	lysophospholipase II	Cytoplasm	enzyme
-1,271	MAGEA2B		MAGEA2/MAGEA2B	melanoma antigen family A2	Nucleus	other
-1,285	MAGEA6		MAGEA3/MAGEA6	melanoma antigen family A6	Other	other
1,100	MALAT1		MALAT1	metastasis associated lung adenocarcinoma transcript 1 (non-protein coding)	Nucleus	other
1,753	MAST4		MAST4	microtubule associated serine/threonine kinase family member 4	Other	kinase
1,182	MAZ		MAZ	MYC-associated zinc finger protein (purine-binding transcription factor)	Nucleus	transcription regulator
-11,096	MB		MB	myoglobin	Cytoplasm	transporter
1,377	MCCC1		MCCC1	methylcrotonoyl-CoA carboxylase 1 (alpha)	Cytoplasm	enzyme
1,565	MCCC2		MCCC2	methylcrotonoyl-CoA carboxylase 2 (beta)	Cytoplasm	enzyme
-1,370	MCM7		MCM7	minichromosome maintenance complex component 7	Nucleus	enzyme
-1,240	MDH2		MDH2	malate dehydrogenase 2, NAD (mitochondrial)	Cytoplasm	enzyme
-1,197	MIF		MIF	macrophage migration inhibitory factor (glycosylation-inhibiting factor)	Extracellular Space	cytokine
-1,290	MME		MME	membrane metallo-endopeptidase	Plasma Membrane	peptidase
1,230	MPC2		MPC2	mitochondrial pyruvate carrier 2	Plasma Membrane	other
1,403	MPZL1		MPZL1	myelin protein zero-like 1	Plasma Membrane	other
1,195	MRFAP1L1		MRFAP1L1	Morf4 family associated protein 1-like 1	Other	other
-1,309	MRPL18		MRPL18	mitochondrial ribosomal protein L18	Cytoplasm	translation regulator
-1,285	MRPL24		MRPL24	mitochondrial ribosomal protein L24	Cytoplasm	other
-1,281	MRPL37		MRPL37	mitochondrial ribosomal protein L37	Cytoplasm	enzyme
-1,385	MRPS18B		MRPS18B	mitochondrial ribosomal protein S18B	Cytoplasm	other
-1,408	MRPS2		MRPS2	mitochondrial ribosomal protein S2	Cytoplasm	other
1,028	MT-ATP6		MT-ATP6	ATP synthase F0 subunit 6	Cytoplasm	transporter
1,078	MT-ATP8		MT-ATP8	ATP synthase F0 subunit 8	Cytoplasm	enzyme
1,034	MT-CO2		MT-CO2	cytochrome c oxidase subunit II	Cytoplasm	enzyme
1,064	MT-CO3		MT-CO3	cytochrome c oxidase III	Cytoplasm	enzyme
1,042	MT-CYB		MT-CYB	cytochrome b	Cytoplasm	enzyme	atovaquone, atovaquone/proguanil
1,059	MT-ND1		MT-ND1	NADH dehydrogenase, subunit 1 (complex I)	Cytoplasm	enzyme
1,032	MT-ND2		MT-ND2	MTND2	Cytoplasm	enzyme
1,052	MT-ND4		MT-ND4	NADH dehydrogenase, subunit 4 (complex I)	Cytoplasm	enzyme
1,047	MT-ND4L		MT-ND4L	NADH dehydrogenase, subunit 4L (complex I)	Cytoplasm	enzyme
1,063	MT-ND5		MT-ND5	NADH dehydrogenase, subunit 5 (complex I)	Cytoplasm	enzyme
1,099	MT-ND6		MT-ND6	NADH dehydrogenase, subunit 6 (complex I)	Cytoplasm	enzyme
-2,423	MT1X		MT1X	metallothionein 1X	Other	other
1,453	MUT		MUT	methylmalonyl CoA mutase	Cytoplasm	enzyme	hydroxocobalamin, cyanocobalamin
-1,631	MYC		MYC	v-myc avian myelocytomatosis viral oncogene homolog	Nucleus	transcription regulator
1,158	MYL12B		MYL12B	myosin, light chain 12B, regulatory	Cytoplasm	other
1,824	MYRIP		MYRIP	myosin VIIA and Rab interacting protein	Cytoplasm	other
-1,327	MZT2B		MZT2B	mitotic spindle organizing protein 2B	Cytoplasm	other
1,515	NAAA		NAAA	N-acylethanolamine acid amidase	Cytoplasm	enzyme
2,898	NAALAD2		NAALAD2	N-acetylated alpha-linked acidic dipeptidase 2	Plasma Membrane	peptidase
1,522	NAMPT		NAMPT	nicotinamide phosphoribosyltransferase	Extracellular Space	cytokine
1,240	NCAM2		NCAM2	neural cell adhesion molecule 2	Plasma Membrane	other
-1,268	NCL		NCL	nucleolin	Nucleus	other
-1,315	NDUFB4		NDUFB4	NADH dehydrogenase (ubiquinone) 1 beta subcomplex, 4, 15kDa	Cytoplasm	transporter
-1,372	NDUFB7		NDUFB7	NADH dehydrogenase (ubiquinone) 1 beta subcomplex, 7, 18kDa	Cytoplasm	enzyme
-1,147	NDUFS5		NDUFS5	NADH dehydrogenase (ubiquinone) Fe-S protein 5, 15kDa (NADH-coenzyme Q reductase)	Cytoplasm	enzyme
1,172	NEAT1		NEAT1	nuclear paraspeckle assembly transcript 1 (non-protein coding)	Other	other
1,544	NETO1		NETO1	neuropilin (NRP) and tolloid (TLL)-like 1	Extracellular Space	other
1,208	NGRN		NGRN	neugrin, neurite outgrowth associated	Nucleus	other
-1,402	NHP2		NHP2	NHP2 ribonucleoprotein	Nucleus	other
-1,374	MKI67IP		NIFK	nucleolar protein interacting with the FHA domain of MKI67	Nucleus	other
1,254	NKX3-1		NKX3-1	NK3 homeobox 1	Nucleus	transcription regulator
-1,420	NME1		NME1	NME/NM23 nucleoside diphosphate kinase 1	Cytoplasm	kinase
-1,244	NME2		NME2	NME/NM23 nucleoside diphosphate kinase 2	Nucleus	kinase
-1,315	NOC2L		NOC2L	nucleolar complex associated 2 homolog (S. cerevisiae)	Nucleus	transcription regulator
-1,315	NOC2L		NOC2L	nucleolar complex associated 2 homolog (S. cerevisiae)	Nucleus	transcription regulator
1,314	NOLC1		NOLC1	nucleolar and coiled-body phosphoprotein 1	Nucleus	transcription regulator
-1,858	NPC1		NPC1	Niemann-Pick disease, type C1	Cytoplasm	transporter
1,359	NPC2		NPC2	Niemann-Pick disease, type C2	Extracellular Space	other
-1,258	NPM1		NPM1	nucleophosmin (nucleolar phosphoprotein B23, numatrin)	Nucleus	transcription regulator
-1,322	NPM3		NPM3	nucleophosmin/nucleoplasmin 3	Nucleus	other
-3,992	NPPC		NPPC	natriuretic peptide C	Extracellular Space	other
-1,910	NRN1		NRN1	neuritin 1	Cytoplasm	other
-1,252	NSA2		NSA2	NSA2 ribosome biogenesis homolog (S. cerevisiae)	Nucleus	other
-1,239	NUCKS1		NUCKS1	nuclear casein kinase and cyclin-dependent kinase substrate 1	Nucleus	kinase
-1,358	NUDT8		NUDT8	nudix (nucleoside diphosphate linked moiety X)-type motif 8	Cytoplasm	other
-1,929	NUP62		NUP62	nucleoporin 62kDa	Nucleus	transporter
1,323	NUP93		NUP93	nucleoporin 93kDa	Nucleus	other
-1,162	OAZ1		OAZ1	ornithine decarboxylase antizyme 1	Cytoplasm	enzyme
-1,356	ODC1		ODC1	ornithine decarboxylase 1	Cytoplasm	enzyme	tazarotene, eflornithine
1,831	OGFR		OGFR	opioid growth factor receptor	Plasma Membrane	other	enkephalin, methionine
1,305	OSTF1		OSTF1	osteoclast stimulating factor 1	Nucleus	transcription regulator
1,428	OXCT1		OXCT1	3-oxoacid CoA transferase 1	Cytoplasm	enzyme
1,279	PACSIN2		PACSIN2	protein kinase C and casein kinase substrate in neurons 2	Cytoplasm	transporter
-1,172	PARK7		PARK7	parkinson protein 7	Nucleus	enzyme
-1,335	PCBP1		PCBP1	poly(rC) binding protein 1	Nucleus	translation regulator
1,314	PEA15		PEA15	phosphoprotein enriched in astrocytes 15	Cytoplasm	transporter
2,121	PERP		PERP	PERP, TP53 apoptosis effector	Plasma Membrane	other
-1,397	PES1		PES1	pescadillo ribosomal biogenesis factor 1	Nucleus	other
-1,233	PFN1		PFN1	profilin 1	Cytoplasm	other
-1,315	PGAM1		PGAM1	phosphoglycerate mutase 1 (brain)	Cytoplasm	phosphatase
-1,225	PGK1		PGK1	phosphoglycerate kinase 1	Cytoplasm	kinase
-1,518	PHB		PHB	prohibitin	Nucleus	transcription regulator
-1,361	PHB2		PHB2	prohibitin 2	Cytoplasm	transcription regulator
1,554	PHYH		PHYH	phytanoyl-CoA 2-hydroxylase	Cytoplasm	enzyme
1,475	PIK3CD		PIK3CD	phosphatidylinositol-4,5-bisphosphate 3-kinase, catalytic subunit delta	Cytoplasm	kinase	SF 1126, PX-866, dactolisib, GDC-0941, buparlisib, XL147, idelalisib, idelalisib/rituximab
1,364	PITHD1		PITHD1	PITH (C-terminal proteasome-interacting domain of thioredoxin-like) domain containing 1	Nucleus	other
1,210	PITPNA		PITPNA	phosphatidylinositol transfer protein, alpha	Cytoplasm	transporter
1,829	PKIB		PKIB	protein kinase (cAMP-dependent, catalytic) inhibitor beta	Other	other
2,221	PLA2G2A		PLA2G2A	phospholipase A2, group IIA (platelets, synovial fluid)	Cytoplasm	enzyme	varespladib methyl, varespladib, indomethacin
1,452	PLA2G4F		PLA2G4F	phospholipase A2, group IVF	Cytoplasm	enzyme
1,340	PLEKHB1		PLEKHB1	pleckstrin homology domain containing, family B (evectins) member 1	Cytoplasm	other
1,584	PMEPA1		PMEPA1	prostate transmembrane protein, androgen induced 1	Plasma Membrane	other
-1,371	PNP		PNP	purine nucleoside phosphorylase	Nucleus	enzyme	forodesine, PD 141955
-1,252	PPA1		PPA1	pyrophosphatase (inorganic) 1	Cytoplasm	enzyme
1,196	PPDPF		PPDPF	pancreatic progenitor cell differentiation and proliferation factor	Other	other
-1,152	PPIB		PPIB	peptidylprolyl isomerase B (cyclophilin B)	Cytoplasm	enzyme
-1,267	PPIF		PPIF	peptidylprolyl isomerase F	Cytoplasm	enzyme
1,770	PPP1R3B		PPP1R3B	protein phosphatase 1, regulatory subunit 3B	Cytoplasm	other
1,196	PRAC		PRAC1	prostate cancer susceptibility candidate 1	Other	other
-1,252	PRDX1		PRDX1	peroxiredoxin 1	Cytoplasm	enzyme
-1,199	PRDX2		PRDX2	peroxiredoxin 2	Cytoplasm	enzyme
-1,269	PRDX5		PRDX5	peroxiredoxin 5	Cytoplasm	enzyme	auranofin
1,150	PRKACB		PRKACB	protein kinase, cAMP-dependent, catalytic, beta	Cytoplasm	kinase
-1,439	PRMT1		PRMT1	protein arginine methyltransferase 1	Nucleus	enzyme
-1,291	PRMT5		PRMT5	protein arginine methyltransferase 5	Cytoplasm	enzyme
1,353	PRMT6		PRMT6	protein arginine methyltransferase 6	Nucleus	enzyme
-1,176	PSAP		PSAP	prosaposin	Extracellular Space	other
-1,280	PSMA7		PSMA7	proteasome (prosome, macropain) subunit, alpha type, 7	Cytoplasm	peptidase
-1,391	PSMB3		PSMB3	proteasome (prosome, macropain) subunit, beta type, 3	Cytoplasm	peptidase
-1,329	PSMB5		PSMB5	proteasome (prosome, macropain) subunit, beta type, 5	Cytoplasm	peptidase	carfilzomib, bortezomib/cladribine/rituximab, bortezomib/sorafenib, bortezomib/paclitaxel, bortezomib/melphalan, bortezomib/dexamethasone, bortezomib/dexamethasone/doxorubicin, bortezomib/dexamethasone/lenalidomide, bortezomib/dexamethasone/thalidomide, carfilzomib/dexamethasone/lenalidomide, bortezomib/prednisone, bortezomib/doxorubicin, bortezomib/vorinostat, bortezomib/thalidomide, bortezomib/…
-1,325	PSMC4		PSMC4	proteasome (prosome, macropain) 26S subunit, ATPase, 4	Nucleus	peptidase
-1,350	PSMD13		PSMD13	proteasome (prosome, macropain) 26S subunit, non-ATPase, 13	Cytoplasm	peptidase
-1,161	PTGES3		PTGES3	prostaglandin E synthase 3 (cytosolic)	Cytoplasm	enzyme
-1,626	PTGR1		PTGR1	prostaglandin reductase 1	Cytoplasm	enzyme
-1,343	PTMA		PTMA	prothymosin, alpha	Nucleus	other
2,609	PTPRR		PTPRR	protein tyrosine phosphatase, receptor type, R	Plasma Membrane	phosphatase
-1,345	PYCR1		PYCR1	pyrroline-5-carboxylate reductase 1	Cytoplasm	enzyme
-2,461	PYCR2		PYCR2	pyrroline-5-carboxylate reductase family, member 2	Cytoplasm	enzyme
1,290	RAB11A		RAB11A	RAB11A, member RAS oncogene family	Cytoplasm	enzyme
1,694	RAB27A		RAB27A	RAB27A, member RAS oncogene family	Cytoplasm	enzyme
2,096	RAB27B		RAB27B	RAB27B, member RAS oncogene family	Cytoplasm	enzyme
1,333	RAB7L1		RAB29	RAB29, member RAS oncogene family	Plasma Membrane	enzyme
1,424	RAC1		RAC1	ras-related C3 botulinum toxin substrate 1 (rho family, small GTP binding protein Rac1)	Plasma Membrane	enzyme
-1,461	RAMP1		RAMP1	receptor (G protein-coupled) activity modifying protein 1	Plasma Membrane	transporter	pramlintide
-1,213	RAN		RAN	RAN, member RAS oncogene family	Nucleus	enzyme
-1,363	RCC1		RCC1	regulator of chromosome condensation 1	Cytoplasm	other
-2,741	RCN3		RCN3	reticulocalbin 3, EF-hand calcium binding domain	Cytoplasm	other
1,182	RDH11		RDH11	retinol dehydrogenase 11 (all-trans/9-cis/11-cis)	Cytoplasm	enzyme
3,737	RDH12		RDH12	retinol dehydrogenase 12 (all-trans/9-cis/11-cis)	Cytoplasm	enzyme
1,419	REEP5		REEP5	receptor accessory protein 5	Extracellular Space	transporter
1,486	RHOU		RHOU	ras homolog family member U	Cytoplasm	enzyme
1,715	RIT1		RIT1	Ras-like without CAAX 1	Plasma Membrane	enzyme
1,481	RNASEK		RNASEK	ribonuclease, RNase K	Other	peptidase
1,344	RNF11		RNF11	ring finger protein 11	Cytoplasm	enzyme
1,411	RNF145		RNF145	ring finger protein 145	Other	other
-1,975	RPA1		RPA1	replication protein A1, 70kDa	Nucleus	other
-1,172	RPL10		RPL10	ribosomal protein L10	Cytoplasm	other
-1,228	RPL10A		RPL10A	ribosomal protein L10a	Nucleus	other
-1,294	RPL12		RPL12	ribosomal protein L12	Nucleus	other
-1,147	RPL13		RPL13	ribosomal protein L13	Cytoplasm	other
-1,220	RPL13A		RPL13A	ribosomal protein L13a	Cytoplasm	other
2,292	RPL13P12		RPL13P12	ribosomal protein L13 pseudogene 12	Other	other
-1,258	RPL14		RPL14	ribosomal protein L14	Cytoplasm	other
-1,320	RPL17		RPL17	ribosomal protein L17	Cytoplasm	other
-2,759	RPL17-C18orf32		RPL17-C18orf32	RPL17-C18orf32 readthrough	Other	other
-1,278	RPL18		RPL18	ribosomal protein L18	Cytoplasm	other
-1,337	RPL18A		RPL18A	ribosomal protein L18a	Cytoplasm	other
-1,160	RPL19		RPL19	ribosomal protein L19	Cytoplasm	other
-1,227	RPL22L1		RPL22L1	ribosomal protein L22-like 1	Other	other
-1,163	RPL23		RPL23	ribosomal protein L23	Cytoplasm	other
-1,221	RPL24		RPL24	ribosomal protein L24	Cytoplasm	other
-1,178	RPL27		RPL27	ribosomal protein L27	Cytoplasm	other
-1,373	RPL29		RPL29	ribosomal protein L29	Cytoplasm	other
-1,212	RPL3		RPL3	ribosomal protein L3	Cytoplasm	other	omacetaxine mepesuccinate
-1,195	RPL30		RPL30	ribosomal protein L30	Cytoplasm	other
-1,195	RPL30		RPL30	ribosomal protein L30	Cytoplasm	other
-1,235	RPL32		RPL32	ribosomal protein L32	Cytoplasm	other
-1,217	RPL34		RPL34	ribosomal protein L34	Cytoplasm	other
-1,238	RPL35		RPL35	ribosomal protein L35	Cytoplasm	other
-1,162	RPL35A		RPL35A	ribosomal protein L35a	Cytoplasm	other
-1,165	RPL36		RPL36	ribosomal protein L36	Cytoplasm	other
-1,227	RPL38		RPL38	ribosomal protein L38	Cytoplasm	other
-1,310	RPL4		RPL4	ribosomal protein L4	Cytoplasm	enzyme
-1,133	RPL41		RPL41	ribosomal protein L41	Cytoplasm	other
-1,215	RPL5		RPL5	ribosomal protein L5	Cytoplasm	other
-1,158	RPL6		RPL6	ribosomal protein L6	Cytoplasm	other
-1,250	RPL7		RPL7	ribosomal protein L7	Nucleus	transcription regulator
-1,198	RPL7A		RPL7A	ribosomal protein L7a	Cytoplasm	other
-1,209	RPL8		RPL8	ribosomal protein L8	Other	other
-1,227	RPL9		RPL9	ribosomal protein L9	Cytoplasm	other
-1,169	RPLP2		RPLP2	ribosomal protein, large, P2	Cytoplasm	other
-1,216	RPS10		RPS10	ribosomal protein S10	Cytoplasm	other
-1,195	RPS11		RPS11	ribosomal protein S11	Cytoplasm	other
-1,214	RPS14		RPS14	ribosomal protein S14	Cytoplasm	translation regulator
-1,181	RPS15		RPS15	ribosomal protein S15	Cytoplasm	other
-1,252	RPS15A		RPS15A	ribosomal protein S15a	Cytoplasm	other
-1,235	RPS16		RPS16	ribosomal protein S16	Cytoplasm	other
-1,756	RPS17L		RPS17	ribosomal protein S17	Cytoplasm	other
-1,157	RPS18		RPS18	ribosomal protein S18	Cytoplasm	other
-1,184	RPS2		RPS2	ribosomal protein S2	Cytoplasm	other
-1,237	RPS21		RPS21	ribosomal protein S21	Cytoplasm	other
-1,142	RPS25		RPS25	ribosomal protein S25	Cytoplasm	other
-1,186	RPS27		RPS27	ribosomal protein S27	Cytoplasm	other
-1,229	RPS29		RPS29	ribosomal protein S29	Cytoplasm	other
-1,243	RPS3		RPS3	ribosomal protein S3	Cytoplasm	enzyme
-1,309	RPS3A		RPS3A	ribosomal protein S3A	Nucleus	other
-1,443	RPS3AP5		RPS3AP5	ribosomal protein S3A pseudogene 5	Other	other
-1,237	RPS4Y1		RPS4Y1	ribosomal protein S4, Y-linked 1	Cytoplasm	other
-1,309	RPS5		RPS5	ribosomal protein S5	Cytoplasm	other
-1,136	RPS6		RPS6	ribosomal protein S6	Cytoplasm	other
-1,177	RPS8		RPS8	ribosomal protein S8	Cytoplasm	other
-1,241	RPS9		RPS9	ribosomal protein S9	Cytoplasm	translation regulator
-1,525	RRP9		RRP9	ribosomal RNA processing 9, small subunit (SSU) processome component, homolog (yeast)	Nucleus	other
-1,398	RSL24D1		RSL24D1	ribosomal L24 domain containing 1	Nucleus	other
-1,425	RUVBL1		RUVBL1	RuvB-like AAA ATPase 1	Nucleus	transcription regulator
1,222	S100A11		S100A11	S100 calcium binding protein A11	Cytoplasm	other
1,411	SAT1		SAT1	spermidine/spermine N1-acetyltransferase 1	Cytoplasm	enzyme
1,240	SBDS		SBDS	Shwachman-Bodian-Diamond syndrome	Nucleus	other
1,425	SC5DL		SC5D	sterol-C5-desaturase	Cytoplasm	enzyme
1,242	SCOC		SCOC	short coiled-coil protein	Cytoplasm	other
1,297	SDCBP		SDCBP	syndecan binding protein (syntenin)	Plasma Membrane	enzyme
-1,423	SEC11C		SEC11C	SEC11 homolog C (S. cerevisiae)	Cytoplasm	peptidase
2,518	SEMA3C		SEMA3C	sema domain, immunoglobulin domain (Ig), short basic domain, secreted, (semaphorin) 3C	Extracellular Space	other
6,479	SEMG2		SEMG2	semenogelin II	Extracellular Space	other
-2,956	SENP3-EIF4A1		SENP3-EIF4A1	SENP3-EIF4A1 readthrough (NMD candidate)	Other	other
-1,266	SERBP1		SERBP1	SERPINE1 mRNA binding protein 1	Cytoplasm	other
1,426	SERF1B		SERF1A/SERF1B	small EDRK-rich factor 1A (telomeric)	Other	other
1,294	SERINC1		SERINC1	serine incorporator 1	Plasma Membrane	transporter
1,380	SERINC2		SERINC2	serine incorporator 2	Plasma Membrane	transporter
2,006	SERPINI1		SERPINI1	serpin peptidase inhibitor, clade I (neuroserpin), member 1	Extracellular Space	other
-2,195	SESN3		SESN3	sestrin 3	Extracellular Space	other
1,673	SETD7		SETD7	SET domain containing (lysine methyltransferase) 7	Nucleus	enzyme
-1,241	SF3B5		SF3B5	splicing factor 3b, subunit 5, 10kDa	Nucleus	other
1,693	SH3BGRL		SH3BGRL	SH3 domain binding glutamate-rich protein like	Cytoplasm	other
-1,795	SHC1		SHC1	SHC (Src homology 2 domain containing) transforming protein 1	Cytoplasm	kinase
-1,346	SHMT2		SHMT2	serine hydroxymethyltransferase 2 (mitochondrial)	Cytoplasm	enzyme
1,527	SLC25A16		SLC25A16	solute carrier family 25 (mitochondrial carrier), member 16	Cytoplasm	transporter
-1,262	SLC25A6		SLC25A6	solute carrier family 25 (mitochondrial carrier; adenine nucleotide translocator), member 6	Cytoplasm	transporter	clodronic acid
-1,410	SLC38A1		SLC38A1	solute carrier family 38, member 1	Plasma Membrane	transporter
-1,851	SLC43A1		SLC43A1	solute carrier family 43 (amino acid system L transporter), member 1	Plasma Membrane	transporter
1,623	SLC4A4		SLC4A4	solute carrier family 4 (sodium bicarbonate cotransporter), member 4	Plasma Membrane	transporter
1,632	SLC7A8		SLC7A8	solute carrier family 7 (amino acid transporter light chain, L system), member 8	Plasma Membrane	transporter
3,531	SLPI		SLPI	secretory leukocyte peptidase inhibitor	Cytoplasm	other
1,230	SMS		SMS	spermine synthase	Cytoplasm	enzyme
-1,742	SNHG9		SNHG9	small nucleolar RNA host gene 9 (non-protein coding)	Other	other
-1,351	SNRPB		SNRPB	small nuclear ribonucleoprotein polypeptides B and B1	Nucleus	other
-1,417	SNRPD2		SNRPD2	small nuclear ribonucleoprotein D2 polypeptide 16.5kDa	Nucleus	other
1,113	SORD		SORD	sorbitol dehydrogenase	Cytoplasm	enzyme
-2,014	SPRYD4		SPRYD4	SPRY domain containing 4	Cytoplasm	other
-1,276	SRM		SRM	spermidine synthase	Cytoplasm	enzyme
-2,534	ST6GALNAC4		ST6GALNAC4	ST6 (alpha-N-acetyl-neuraminyl-2,3-beta-galactosyl-1,3)-N-acetylgalactosaminide alpha-2,6-sialyltransferase 4	Cytoplasm	enzyme
-1,928	ST6GALNAC6		ST6GALNAC6	ST6 (alpha-N-acetyl-neuraminyl-2,3-beta-galactosyl-1,3)-N-acetylgalactosaminide alpha-2,6-sialyltransferase 6	Cytoplasm	enzyme
1,305	STEAP1		STEAP1	six transmembrane epithelial antigen of the prostate 1	Plasma Membrane	transporter
1,328	STEAP2		STEAP2	STEAP family member 2, metalloreductase	Plasma Membrane	transporter
-1,265	STIP1		STIP1	stress-induced phosphoprotein 1	Cytoplasm	other
-1,325	STOML2		STOML2	stomatin (EPB72)-like 2	Plasma Membrane	other
-1,300	STUB1		STUB1	STIP1 homology and U-box containing protein 1, E3 ubiquitin protein ligase	Cytoplasm	enzyme
1,813	STX12		STX12	syntaxin 12	Cytoplasm	other
1,876	STYK1		STYK1	serine/threonine/tyrosine kinase 1	Cytoplasm	kinase
1,232	SUCLG2		SUCLG2	succinate-CoA ligase, GDP-forming, beta subunit	Cytoplasm	enzyme
1,394	SUMF2		SUMF2	sulfatase modifying factor 2	Cytoplasm	other
1,528	SVIP		SVIP	small VCP/p97-interacting protein	Cytoplasm	other
1,776	SYT4		SYT4	synaptotagmin IV	Cytoplasm	transporter
1,432	TACC1		TACC1	transforming, acidic coiled-coil containing protein 1	Nucleus	other
1,767	TAOK3		TAOK3	TAO kinase 3	Cytoplasm	kinase
1,562	TBC1D9		TBC1D9	TBC1 domain family, member 9 (with GRAM domain)	Plasma Membrane	other
1,407	TBC1D9B		TBC1D9B	TBC1 domain family, member 9B (with GRAM domain)	Other	other
1,327	TBRG1		TBRG1	transforming growth factor beta regulator 1	Nucleus	other
1,394	TC2N		TC2N	tandem C2 domains, nuclear	Nucleus	transporter
1,421	FAM115A		TCAF1	TRPM8 channel-associated factor 1	Plasma Membrane	other
-1,319	TCEB2		TCEB2	transcription elongation factor B (SIII), polypeptide 2 (18kDa, elongin B)	Nucleus	transcription regulator
-1,267	TCP1		TCP1	t-complex 1	Cytoplasm	other
-4,436	TEN1		TEN1	TEN1 CST complex subunit	Nucleus	other
1,621	TFPT		TFPT	TCF3 (E2A) fusion partner (in childhood Leukemia)	Nucleus	other
-1,373	TFRC		TFRC	transferrin receptor	Plasma Membrane	transporter
2,311	THBS1		THBS1	thrombospondin 1	Extracellular Space	other
2,311	THBS1		THBS1	thrombospondin 1	Extracellular Space	other
-1,336	TIMM10		TIMM10	translocase of inner mitochondrial membrane 10 homolog (yeast)	Cytoplasm	transporter
-1,334	TK1		TK1	thymidine kinase 1, soluble	Cytoplasm	kinase
1,740	TM4SF1		TM4SF1	transmembrane 4 L six family member 1	Plasma Membrane	other
1,099	TMBIM6		TMBIM6	transmembrane BAX inhibitor motif containing 6	Nucleus	other
-1,303	TMED9		TMED9	transmembrane emp24 protein transport domain containing 9	Cytoplasm	transporter
2,730	TMEFF2		TMEFF2	transmembrane protein with EGF-like and two follistatin-like domains 2	Cytoplasm	other
1,213	TMEM54		TMEM54	transmembrane protein 54	Other	other
1,882	TMEM79		TMEM79	transmembrane protein 79	Cytoplasm	other
1,275	TMSB4X		TMSB10/TMSB4X	thymosin beta 10	Cytoplasm	other
3,258	TMX2-CTNND1		TMX2-CTNND1	TMX2-CTNND1 readthrough (NMD candidate)	Other	other
1,478	TNKS1BP1		TNKS1BP1	tankyrase 1 binding protein 1, 182kDa	Nucleus	other
-1,338	TOMM20		TOMM20	translocase of outer mitochondrial membrane 20 homolog (yeast)	Cytoplasm	transporter
-2,043	TOMM5		TOMM5	translocase of outer mitochondrial membrane 5 homolog (yeast)	Cytoplasm	other
-1,420	TP53		TP53	tumor protein p53	Nucleus	transcription regulator
1,329	TP53TG1		TP53TG1	TP53 target 1 (non-protein coding)	Other	other
1,224	TPD52		TPD52	tumor protein D52	Cytoplasm	other
-1,304	TPI1		TPI1	triosephosphate isomerase 1	Cytoplasm	enzyme
2,089	TPM4		TPM4	tropomyosin 4	Cytoplasm	other
-1,243	TPT1		TPT1	tumor protein, translationally-controlled 1	Cytoplasm	other
-1,443	TRAP1		TRAP1	TNF receptor-associated protein 1	Cytoplasm	enzyme
4,334	TRGC1		TRGC1	T cell receptor gamma constant 1	Other	other
3,575	TRGC2		TRGC2	T cell receptor gamma constant 2	Other	other
3,071	TRGJP		TRGJP	T cell receptor gamma joining P	Other	other
2,185	TRIM49D1P	D	TRIM49D1/TRIM49D2P	tripartite motif containing 49D2, pseudogene	Other	other
3,148	TRIM49D2P	D	TRIM49D1/TRIM49D2P	tripartite motif containing 49D2, pseudogene	Other	other
-1,290	TRMT112		TRMT112	tRNA methyltransferase 11-2 homolog (S. cerevisiae)	Cytoplasm	enzyme
1,475	TRPM8		TRPM8	transient receptor potential cation channel, subfamily M, member 8	Plasma Membrane	ion channel
-1,392	TRUB2		TRUB2	TruB pseudouridine (psi) synthase family member 2	Cytoplasm	enzyme
1,455	TSC22D1		TSC22D1	TSC22 domain family, member 1	Nucleus	transcription regulator
-1,448	TST		TST	thiosulfate sulfurtransferase (rhodanese)	Cytoplasm	enzyme
1,356	TUBA1A		TUBA1A	tubulin, alpha 1a	Cytoplasm	other	epothilone B, colchicine/probenecid, larotaxel, eribulin, davunetide, vintafolide, milataxel, cevipabulin, gemcitabine/paclitaxel, docetaxel/prednisone, capecitabine/docetaxel, paclitaxel/trastuzumab, cyclophosphamide/prednisone/vincristine, docetaxel/hydrocortisone, cyclophosphamide/docetaxel, gemcitabine/vinorelbine, cyclophosphamide/daunorubicin/imatinib/prednisone/vincristine, cyclophosphamid…
-1,269	TUBA1B		TUBA1B	tubulin, alpha 1b	Cytoplasm	other
-1,162	TUBB4B		TUBB4B	tubulin, beta 4B class IVb	Cytoplasm	other	epothilone B, colchicine/probenecid, larotaxel, ABT-751, eribulin, simotaxel, davunetide, vintafolide, milataxel, cevipabulin, brentuximab vedotin, cabazitaxel, gemcitabine/paclitaxel, docetaxel/prednisone, capecitabine/docetaxel, paclitaxel/trastuzumab, cyclophosphamide/prednisone/vincristine, docetaxel/hydrocortisone, cyclophosphamide/docetaxel, gemcitabine/vinorelbine, cyclophosphamide/daunoru…
-1,274	TUFM		TUFM	Tu translation elongation factor, mitochondrial	Cytoplasm	translation regulator
1,687	TUFT1		TUFT1	tuftelin 1	Cytoplasm	other
1,179	TWF1		TWF1	twinfilin actin-binding protein 1	Cytoplasm	kinase
1,389	TWSG1		TWSG1	twisted gastrulation BMP signaling modulator 1	Extracellular Space	other
-1,238	TXN		TXN	thioredoxin	Cytoplasm	enzyme
-1,286	TXN2		TXN2	thioredoxin 2	Cytoplasm	enzyme
-1,449	TXNDC5		TXNDC5	thioredoxin domain containing 5 (endoplasmic reticulum)	Cytoplasm	enzyme
-1,376	TXNIP		TXNIP	thioredoxin interacting protein	Cytoplasm	other
-1,349	U2AF2		U2AF2	U2 small nuclear RNA auxiliary factor 2	Nucleus	other
-1,242	UBA52		UBA52	ubiquitin A-52 residue ribosomal protein fusion product 1	Cytoplasm	enzyme
-1,161	UBB		UBB	ubiquitin B	Cytoplasm	enzyme
1,133	UBC		UBC	ubiquitin C	Cytoplasm	enzyme
1,206	UBE2E1		UBE2E1	ubiquitin-conjugating enzyme E2E 1	Cytoplasm	enzyme
1,165	UGT2B17		UGT2B17	UDP glucuronosyltransferase 2 family, polypeptide B17	Cytoplasm	enzyme
-1,285	UHMK1		UHMK1	U2AF homology motif (UHM) kinase 1	Nucleus	kinase
-1,218	UQCRFS1		UQCRFS1	ubiquinol-cytochrome c reductase, Rieske iron-sulfur polypeptide 1	Cytoplasm	enzyme
-1,269	UQCRH		UQCRH	ubiquinol-cytochrome c reductase hinge protein	Cytoplasm	enzyme
1,303	USO1		USO1	USO1 vesicle transport factor	Cytoplasm	transporter
1,342	UTRN		UTRN	utrophin	Plasma Membrane	transmembrane receptor
2,624	VAMP2		VAMP2	vesicle-associated membrane protein 2 (synaptobrevin 2)	Plasma Membrane	other	botulinum toxin type B
-1,438	VAMP3		VAMP3	vesicle-associated membrane protein 3	Plasma Membrane	other
-1,219	VDAC1		VDAC1	voltage-dependent anion channel 1	Cytoplasm	ion channel
-1,243	VDAC2		VDAC2	voltage-dependent anion channel 2	Cytoplasm	ion channel
1,491	VPS13A		VPS13A	vacuolar protein sorting 13 homolog A (S. cerevisiae)	Cytoplasm	transporter
1,421	WBP5		WBP5	WW domain binding protein 5	Other	other
-2,911	XAGE1B		XAGE1B/XAGE1E	X antigen family, member 1E	Nucleus	other
-1,189	XRCC6		XRCC6	X-ray repair complementing defective repair in Chinese hamster cells 6	Nucleus	enzyme
-1,129	YBX1		YBX1	Y box binding protein 1	Nucleus	transcription regulator
-1,430	ZNF217		ZNF217	zinc finger protein 217	Nucleus	transcription regulator
2,248	ZPLD1		ZPLD1	zona pellucida-like domain containing 1	Other	other

## Sheet: SI_D _LNCaP si vs scr Hx
© 2000-2015 QIAGEN. All rights reserved.
Fold-change	ID	Notes	Symbol	Entrez Gene Name	Location	Type(s)	Drug(s)
-1,779	AADAT		AADAT	aminoadipate aminotransferase	Cytoplasm	enzyme
1,131	ABHD2		ABHD2	abhydrolase domain containing 2	Other	enzyme
-1,915	CXCR7		ACKR3	atypical chemokine receptor 3	Plasma Membrane	G-protein coupled receptor
1,828	ACPP		ACPP	acid phosphatase, prostate	Extracellular Space	phosphatase
-2,442	ADAM7		ADAM7	ADAM metallopeptidase domain 7	Plasma Membrane	peptidase
-1,444	ADAM9		ADAM9	ADAM metallopeptidase domain 9	Plasma Membrane	peptidase
1,996	ADAMTS1		ADAMTS1	ADAM metallopeptidase with thrombospondin type 1 motif, 1	Extracellular Space	peptidase
3,838	ADRA2A		ADRA2A	adrenoceptor alpha 2A	Plasma Membrane	G-protein coupled receptor	paliperidone, risperidone, antazoline/naphazoline, acetaminophen/clemastine/pseudoephedrine, articaine/epinephrine, bupivacaine/epinephrine, caffeine/ergotamine, acetaminophen/dexbrompheniramine/pseudoephedrine, dapiprazole, dexbrompheniramine/pseudoephedrine, chlorpheniramine/ibuprofen/pseudoephedrine, dipivefrin, cetirizine/pseudoephedrine, asenapine, epinephrine/prilocaine, epinephrine/lidocai…
1,719	AES		AES	amino-terminal enhancer of split	Nucleus	transcription regulator
-1,252	AHCY		AHCY	adenosylhomocysteinase	Cytoplasm	enzyme	9-(2',3'-dihydroxycyclopent-4'-enyl)adenine, 3-deazaneplanocin, neplanocin A, 3-deazaaristeromycin, cyanovirin-N, 6'-C-methylneplanocin A
1,887	AHNAK		AHNAK	AHNAK nucleoprotein	Nucleus	other
-1,513	AK2		AK2	adenylate kinase 2	Cytoplasm	kinase
1,994	ALCAM		ALCAM	activated leukocyte cell adhesion molecule	Plasma Membrane	other
1,425	ALDH1A3		ALDH1A3	aldehyde dehydrogenase 1 family, member A3	Cytoplasm	enzyme
1,821	ALDH3B2		ALDH3B2	aldehyde dehydrogenase 3 family, member B2	Other	enzyme
1,510	ALDH4A1		ALDH4A1	aldehyde dehydrogenase 4 family, member A1	Cytoplasm	enzyme
2,191	AMACR		AMACR	alpha-methylacyl-CoA racemase	Cytoplasm	enzyme
1,131	AMD1		AMD1	adenosylmethionine decarboxylase 1	Cytoplasm	enzyme
7,358	ANGPT2		ANGPT2	angiopoietin 2	Extracellular Space	growth factor	trebananib
1,758	ANKRD52		ANKRD52	ankyrin repeat domain 52	Nucleus	transcription regulator
-1,403	ANP32B		ANP32B	acidic (leucine-rich) nuclear phosphoprotein 32 family, member B	Nucleus	other
-1,831	ANP32E		ANP32E	acidic (leucine-rich) nuclear phosphoprotein 32 family, member E	Nucleus	other
-1,436	APEX1		APEX1	APEX nuclease (multifunctional DNA repair enzyme) 1	Nucleus	enzyme
2,300	APH1B		APH1B	APH1B gamma secretase subunit	Other	peptidase
-1,373	API5		API5	apoptosis inhibitor 5	Cytoplasm	other
-1,469	APOO		APOO	apolipoprotein O	Extracellular Space	other
-1,199	ARF4		ARF4	ADP-ribosylation factor 4	Cytoplasm	enzyme
1,690	KIAA1244		ARFGEF3	ARFGEF family member 3	Other	other
1,425	ARHGAP29		ARHGAP29	Rho GTPase activating protein 29	Cytoplasm	other
1,950	ARHGEF37		ARHGEF37	Rho guanine nucleotide exchange factor (GEF) 37	Other	other
1,698	ARHGEF5		ARHGEF5	Rho guanine nucleotide exchange factor (GEF) 5	Cytoplasm	other
2,021	ARHGEF9		ARHGEF9	Cdc42 guanine nucleotide exchange factor (GEF) 9	Cytoplasm	other
-2,058	ARL5B		ARL5B	ADP-ribosylation factor-like 5B	Other	enzyme
-1,553	ARPP19		ARPP19	cAMP-regulated phosphoprotein, 19kDa	Cytoplasm	transporter
1,214	ASAH1		ASAH1	N-acylsphingosine amidohydrolase (acid ceramidase) 1	Cytoplasm	enzyme
-1,328	ASNA1		ASNA1	arsA arsenite transporter, ATP-binding, homolog 1 (bacterial)	Nucleus	transporter
-1,428	ATF4		ATF4	activating transcription factor 4	Nucleus	transcription regulator
1,662	ATP2C1		ATP2C1	ATPase, Ca++ transporting, type 2C, member 1	Cytoplasm	transporter	sevoflurane, isoflurane, desflurane, enflurane, Ca2+
-1,345	ATP5B		ATP5B	ATP synthase, H+ transporting, mitochondrial F1 complex, beta polypeptide	Cytoplasm	transporter
-1,384	ATP5C1		ATP5C1	ATP synthase, H+ transporting, mitochondrial F1 complex, gamma polypeptide 1	Cytoplasm	transporter
-1,744	ATP5G1		ATP5G1	ATP synthase, H+ transporting, mitochondrial Fo complex, subunit C1 (subunit 9)	Cytoplasm	transporter
-1,426	ATP5G3		ATP5G3	ATP synthase, H+ transporting, mitochondrial Fo complex, subunit C3 (subunit 9)	Cytoplasm	transporter
-1,514	ATP5H		ATP5H	ATP synthase, H+ transporting, mitochondrial Fo complex, subunit d	Cytoplasm	enzyme
-1,330	ATP5I		ATP5I	ATP synthase, H+ transporting, mitochondrial Fo complex, subunit E	Cytoplasm	transporter
1,483	ATP6V0C		ATP6V0C	ATPase, H+ transporting, lysosomal 16kDa, V0 subunit c	Cytoplasm	transporter
-1,737	ATP6V1G2-DDX39B		ATP6V1G2-DDX39B	ATP6V1G2-DDX39B readthrough (NMD candidate)	Other	other
1,944	ATP9A		ATP9A	ATPase, class II, type 9A	Cytoplasm	transporter
1,405	B2M		B2M	beta-2-microglobulin	Plasma Membrane	transmembrane receptor
1,873	B3GALNT2		B3GALNT2	beta-1,3-N-acetylgalactosaminyltransferase 2	Cytoplasm	enzyme
-1,929	BAMBI		BAMBI	BMP and activin membrane-bound inhibitor	Plasma Membrane	other
1,529	BARD1		BARD1	BRCA1 associated RING domain 1	Nucleus	transcription regulator
2,199	BCHE		BCHE	butyrylcholinesterase	Plasma Membrane	enzyme	dipivefrin, malathion, atropine/edrophonium, echothiophate, tacrine, edrophonium, isoflurophate, pyridostigmine, pralidoxime, rivastigmine
1,557	BCL2L1		BCL2L1	BCL2-like 1	Cytoplasm	other
-1,451	BIK		BIK	BCL2-interacting killer (apoptosis-inducing)	Cytoplasm	other
-1,727	BLOC1S4		BLOC1S4	biogenesis of lysosomal organelles complex-1, subunit 4, cappuccino	Cytoplasm	other
2,002	BMPR1B		BMPR1B	bone morphogenetic protein receptor, type IB	Plasma Membrane	kinase
-1,278	BNIP3		BNIP3	BCL2/adenovirus E1B 19kDa interacting protein 3	Cytoplasm	other
-1,390	BNIP3P1		BNIP3P1	BCL2/adenovirus E1B 19kDa interacting protein 3 pseudogene 1	Other	other
-1,333	BTF3		BTF3	basic transcription factor 3	Nucleus	transcription regulator
1,305	BTG1		BTG1	B-cell translocation gene 1, anti-proliferative	Nucleus	transcription regulator
-1,673	BTG3		BTG3	BTG family, member 3	Nucleus	other
-1,409	BZW1		BZW1	basic leucine zipper and W2 domains 1	Cytoplasm	translation regulator
1,624	C1orf116		C1orf116	chromosome 1 open reading frame 116	Cytoplasm	other
1,681	C1orf122		C1orf122	chromosome 1 open reading frame 122	Other	other
-1,260	C1orf43		C1orf43	chromosome 1 open reading frame 43	Other	other
-1,279	C1QBP		C1QBP	complement component 1, q subcomponent binding protein	Cytoplasm	transcription regulator
1,465	C1QTNF3		C1QTNF3	C1q and tumor necrosis factor related protein 3	Extracellular Space	other
-1,199	C4orf3		C4orf3	chromosome 4 open reading frame 3	Other	other
1,586	C6orf106		C6orf106	chromosome 6 open reading frame 106	Other	other
-1,462	C8orf33		C8orf33	chromosome 8 open reading frame 33	Other	other
-1,502	CA12		CA12	carbonic anhydrase XII	Plasma Membrane	enzyme	methazolamide, hydrochlorothiazide, acetazolamide, trichloromethiazide, chlorothiazide, chlorthalidone, benzthiazide, sulfacetamide, topiramate
1,961	CA5BP1		CA5BP1	carbonic anhydrase VB pseudogene 1	Other	other
1,944	CACFD1		CACFD1	calcium channel flower domain containing 1	Other	other
-1,401	CACYBP		CACYBP	calcyclin binding protein	Nucleus	other
1,257	CALM1		CALM1 (includes others)	calmodulin 1 (phosphorylase kinase, delta)	Cytoplasm	other
-1,274	CALU		CALU	calumenin	Cytoplasm	other
1,908	CAMK2N1		CAMK2N1	calcium/calmodulin-dependent protein kinase II inhibitor 1	Plasma Membrane	kinase
1,289	CANT1		CANT1	calcium activated nucleotidase 1	Extracellular Space	enzyme
1,211	CAPNS1		CAPNS1	calpain, small subunit 1	Cytoplasm	peptidase
-2,247	CBFB		CBFB	core-binding factor, beta subunit	Nucleus	transcription regulator
-1,579	CBX3		CBX3	chromobox homolog 3	Nucleus	transcription regulator
2,281	CCDC85C		CCDC85C	coiled-coil domain containing 85C	Plasma Membrane	other
-1,605	CCNB1		CCNB1	cyclin B1	Cytoplasm	kinase
-1,302	CCND1		CCND1	cyclin D1	Nucleus	transcription regulator	arsenic trioxide/tretinoin, arsenic trioxide/daunorubicin/tretinoin, arsenic trioxide/gemtuzumab ozogamicin/tretinoin, arsenic trioxide/idarubicin/tretinoin, arsenic trioxide
-1,327	CCNG1		CCNG1	cyclin G1	Nucleus	other
-1,235	CCT2		CCT2	chaperonin containing TCP1, subunit 2 (beta)	Cytoplasm	kinase
-1,297	CCT3		CCT3	chaperonin containing TCP1, subunit 3 (gamma)	Cytoplasm	other
-1,337	CCT4		CCT4	chaperonin containing TCP1, subunit 4 (delta)	Cytoplasm	other
-1,415	CCT6A		CCT6A	chaperonin containing TCP1, subunit 6A (zeta 1)	Cytoplasm	other
-1,265	CCT7		CCT7	chaperonin containing TCP1, subunit 7 (eta)	Cytoplasm	other
-1,241	CCT8		CCT8	chaperonin containing TCP1, subunit 8 (theta)	Cytoplasm	enzyme
1,231	CD9		CD9	CD9 molecule	Plasma Membrane	other
2,394	CDC42EP3		CDC42EP3	CDC42 effector protein (Rho GTPase binding) 3	Cytoplasm	other
1,144	CDH1		CDH1	cadherin 1, type 1, E-cadherin (epithelial)	Plasma Membrane	other
-1,439	CDK1		CDK1	cyclin-dependent kinase 1	Nucleus	kinase	alvocidib
1,653	CDK14		CDK14	cyclin-dependent kinase 14	Nucleus	kinase
-1,330	CDK4		CDK4	cyclin-dependent kinase 4	Nucleus	kinase	palbociclib, LEE011, alvocidib
-1,278	CDKN1A		CDKN1A	cyclin-dependent kinase inhibitor 1A (p21, Cip1)	Nucleus	kinase
1,405	CERS6		CERS6	ceramide synthase 6	Nucleus	transcription regulator
-1,420	CETN2		CETN2	centrin, EF-hand protein, 2	Nucleus	enzyme
-1,561	CFDP1		CFDP1	craniofacial development protein 1	Extracellular Space	other
-1,561	CFDP1		CFDP1	craniofacial development protein 1	Extracellular Space	other
-1,413	CHCHD10		CHCHD10	coiled-coil-helix-coiled-coil-helix domain containing 10	Cytoplasm	other
-1,276	CHCHD2		CHCHD2	coiled-coil-helix-coiled-coil-helix domain containing 2	Cytoplasm	other
-1,404	CHMP5		CHMP5	charged multivesicular body protein 5	Cytoplasm	other
1,916	CHST14		CHST14	carbohydrate (N-acetylgalactosamine 4-0) sulfotransferase 14	Cytoplasm	enzyme
-1,224	CIB1		CIB1	calcium and integrin binding 1 (calmyrin)	Nucleus	other
-1,960	CKS2		CKS2	CDC28 protein kinase regulatory subunit 2	Other	kinase
2,218	CLEC7A		CLEC7A	C-type lectin domain family 7, member A	Plasma Membrane	transmembrane receptor
-1,432	CLK1		CLK1	CDC-like kinase 1	Nucleus	kinase
-2,026	CLU		CLU	clusterin	Cytoplasm	other
1,391	CMTM6		CMTM6	CKLF-like MARVEL transmembrane domain containing 6	Extracellular Space	cytokine
-1,181	CNBP		CNBP	CCHC-type zinc finger, nucleic acid binding protein	Nucleus	transcription regulator
-1,286	CNIH		CNIH1	cornichon family AMPA receptor auxiliary protein 1	Plasma Membrane	other
-1,503	CNIH4		CNIH4	cornichon family AMPA receptor auxiliary protein 4	Plasma Membrane	other
-1,620	COA6		COA6	cytochrome c oxidase assembly factor 6	Cytoplasm	other
1,790	COBLL1		COBLL1	cordon-bleu WH2 repeat protein-like 1	Extracellular Space	other
-1,253	COPZ1		COPZ1	coatomer protein complex, subunit zeta 1	Cytoplasm	transporter
-1,606	COX16		COX16	COX16 cytochrome c oxidase assembly homolog (S. cerevisiae)	Cytoplasm	other
-1,251	COX5A		COX5A	cytochrome c oxidase subunit Va	Cytoplasm	enzyme
-1,318	COX5B		COX5B	cytochrome c oxidase subunit Vb	Cytoplasm	enzyme
-1,226	COX6A1		COX6A1	cytochrome c oxidase subunit VIa polypeptide 1	Cytoplasm	enzyme
-1,232	COX7C		COX7C	cytochrome c oxidase subunit VIIc	Cytoplasm	enzyme
-1,536	CPOX		CPOX	coproporphyrinogen oxidase	Cytoplasm	enzyme
3,159	EFCAB4A		CRACR2B	calcium release activated channel regulator 2B	Cytoplasm	other
1,876	CREBL2		CREBL2	cAMP responsive element binding protein-like 2	Nucleus	transcription regulator
5,661	CRISP3		CRISP3	cysteine-rich secretory protein 3	Extracellular Space	other
-2,569	CSAG3	D	CSAG2/CSAG3	CSAG family, member 3	Other	other
3,198	CSAG2	D	CSAG2/CSAG3	CSAG family, member 3	Other	other
-1,199	CSDE1		CSDE1	cold shock domain containing E1, RNA-binding	Cytoplasm	enzyme
1,488	CTSD		CTSD	cathepsin D	Cytoplasm	peptidase
1,993	CTSO		CTSO	cathepsin O	Cytoplasm	peptidase
1,419	CTTN		CTTN	cortactin	Plasma Membrane	other
3,650	CWH43		CWH43	cell wall biogenesis 43 C-terminal homolog (S. cerevisiae)	Other	other
-1,525	CYC1		CYC1	cytochrome c-1	Cytoplasm	enzyme
2,617	CYP2J2		CYP2J2	cytochrome P450, family 2, subfamily J, polypeptide 2	Cytoplasm	enzyme
3,055	CYP4F30P		CYP4F30P	cytochrome P450, family 4, subfamily F, polypeptide 30, pseudogene	Other	other
-1,264	DAD1		DAD1	defender against cell death 1	Cytoplasm	other
-1,217	DANCR		DANCR	differentiation antagonizing non-protein coding RNA	Other	other
-1,311	DAP3		DAP3	death associated protein 3	Cytoplasm	other
-1,443	DCTPP1		DCTPP1	dCTP pyrophosphatase 1	Cytoplasm	enzyme
-1,489	DDIT4		DDIT4	DNA-damage-inducible transcript 4	Cytoplasm	other
-1,457	DDX21		DDX21	DEAD (Asp-Glu-Ala-Asp) box helicase 21	Nucleus	enzyme
1,153	DDX5		DDX5	DEAD (Asp-Glu-Ala-Asp) box helicase 5	Nucleus	enzyme
-1,449	DDX50		DDX50	DEAD (Asp-Glu-Ala-Asp) box polypeptide 50	Nucleus	enzyme
2,118	DEFB132		DEFB132	defensin, beta 132	Extracellular Space	other
-1,478	DEGS1		DEGS1	delta(4)-desaturase, sphingolipid 1	Plasma Membrane	enzyme
1,504	DEXI		DEXI	Dexi homolog (mouse)	Other	other
1,258	DHCR24		DHCR24	24-dehydrocholesterol reductase	Cytoplasm	enzyme
1,506	DHRS7		DHRS7	dehydrogenase/reductase (SDR family) member 7	Other	enzyme
2,221	DIO1		DIO1	deiodinase, iodothyronine, type I	Cytoplasm	enzyme	propylthiouracil
9,667	DIO3OS		DIO3OS	DIO3 opposite strand/antisense RNA (head to head)	Other	other
1,628	DLG5		DLG5	discs, large homolog 5 (Drosophila)	Plasma Membrane	other
-1,337	DPM1		DPM1	dolichyl-phosphate mannosyltransferase polypeptide 1, catalytic subunit	Cytoplasm	enzyme
1,705	DPP4		DPP4	dipeptidyl-peptidase 4	Plasma Membrane	peptidase	saxagliptin, talabostat, alogliptin, sitagliptin, vildagliptin, linagliptin, simvastatin/sitagliptin, alogliptin/pioglitazone, empagliflozin/linagliptin
-1,273	DSC2		DSC2	desmocollin 2	Plasma Membrane	other
-1,766	DSCC1		DSCC1	DNA replication and sister chromatid cohesion 1	Nucleus	other
1,510	DSEL		DSEL	dermatan sulfate epimerase-like	Extracellular Space	enzyme
2,255	DUSP1		DUSP1	dual specificity phosphatase 1	Nucleus	phosphatase
1,490	DUSP16		DUSP16	dual specificity phosphatase 16	Nucleus	phosphatase
1,527	DUSP3		DUSP3	dual specificity phosphatase 3	Cytoplasm	phosphatase
1,515	DYNC1H1		DYNC1H1	dynein, cytoplasmic 1, heavy chain 1	Cytoplasm	peptidase
1,184	DYNLL2		DYNLL2	dynein, light chain, LC8-type 2	Cytoplasm	other
-1,548	EBPL		EBPL	emopamil binding protein-like	Cytoplasm	enzyme
1,273	ECH1		ECH1	enoyl CoA hydratase 1, peroxisomal	Cytoplasm	enzyme
1,472	ECI1		ECI1	enoyl-CoA delta isomerase 1	Cytoplasm	enzyme
1,497	EDEM3		EDEM3	ER degradation enhancer, mannosidase alpha-like 3	Cytoplasm	enzyme
-1,178	EEF1A1		EEF1A1	eukaryotic translation elongation factor 1 alpha 1	Cytoplasm	translation regulator
-1,525	EEF1B2		EEF1B2	eukaryotic translation elongation factor 1 beta 2	Cytoplasm	translation regulator
-1,327	EEF1G		EEF1G	eukaryotic translation elongation factor 1 gamma	Cytoplasm	translation regulator
2,040	EEPD1		EEPD1	endonuclease/exonuclease/phosphatase family domain containing 1	Other	other
1,336	EFNA5		EFNA5	ephrin-A5	Plasma Membrane	kinase
2,395	EFNB2		EFNB2	ephrin-B2	Plasma Membrane	other
2,107	EHBP1		EHBP1	EH domain binding protein 1	Cytoplasm	other
2,399	EID1		EID1	EP300 interacting inhibitor of differentiation 1	Nucleus	transcription regulator
-1,321	EIF1		EIF1	eukaryotic translation initiation factor 1	Nucleus	other
-1,555	EIF2S1		EIF2S1	eukaryotic translation initiation factor 2, subunit 1 alpha, 35kDa	Cytoplasm	translation regulator
-1,272	EIF2S3		EIF2S3	eukaryotic translation initiation factor 2, subunit 3 gamma, 52kDa	Cytoplasm	translation regulator
-1,383	EIF3D		EIF3D	eukaryotic translation initiation factor 3, subunit D	Cytoplasm	other
-1,641	EIF3E		EIF3E	eukaryotic translation initiation factor 3, subunit E	Cytoplasm	other
-1,249	EIF3I		EIF3I	eukaryotic translation initiation factor 3, subunit I	Cytoplasm	translation regulator
-1,321	EIF3J		EIF3J	eukaryotic translation initiation factor 3, subunit J	Cytoplasm	translation regulator
-1,538	EIF4B		EIF4B	eukaryotic translation initiation factor 4B	Cytoplasm	translation regulator
-1,346	EIF4EBP1		EIF4EBP1	eukaryotic translation initiation factor 4E binding protein 1	Cytoplasm	translation regulator
-1,236	EIF4H		EIF4H	eukaryotic translation initiation factor 4H	Cytoplasm	translation regulator
-1,219	EIF5A		EIF5A	eukaryotic translation initiation factor 5A	Cytoplasm	translation regulator
1,378	ELL2		ELL2	elongation factor, RNA polymerase II, 2	Nucleus	transcription regulator
1,273	ELOVL5		ELOVL5	ELOVL fatty acid elongase 5	Cytoplasm	enzyme
1,945	EMC6		EMC6	ER membrane protein complex subunit 6	Cytoplasm	other
1,506	ENC1		ENC1	ectodermal-neural cortex 1 (with BTB domain)	Nucleus	peptidase
1,589	ENDOG		ENDOG	endonuclease G	Cytoplasm	enzyme
-1,210	ENO1		ENO1	enolase 1, (alpha)	Cytoplasm	enzyme
-1,663	ENPP4		ENPP4	ectonucleotide pyrophosphatase/phosphodiesterase 4 (putative)	Cytoplasm	enzyme
2,804	ENPP5		ENPP5	ectonucleotide pyrophosphatase/phosphodiesterase 5 (putative)	Extracellular Space	enzyme
7,804	EPDR1		EPDR1	ependymin related 1	Nucleus	other
1,580	EPHX1		EPHX1	epoxide hydrolase 1, microsomal (xenobiotic)	Cytoplasm	peptidase
1,971	EPN1		EPN1	epsin 1	Plasma Membrane	other
1,489	EPPK1		EPPK1	epiplakin 1	Cytoplasm	other
-1,326	ERH		ERH	enhancer of rudimentary homolog (Drosophila)	Nucleus	other
1,507	ETV1		ETV1	ets variant 1	Nucleus	transcription regulator
1,439	EXOC7		EXOC7	exocyst complex component 7	Cytoplasm	transporter
-1,555	F2RL1		F2RL1	coagulation factor II (thrombin) receptor-like 1	Plasma Membrane	G-protein coupled receptor
-1,555	F2RL1		F2RL1	coagulation factor II (thrombin) receptor-like 1	Plasma Membrane	G-protein coupled receptor
-3,937	FAM103A1		FAM103A1	family with sequence similarity 103, member A1	Nucleus	other
1,295	FAM111A		FAM111A	family with sequence similarity 111, member A	Nucleus	other
1,600	FAM127A		FAM127A	family with sequence similarity 127, member A	Plasma Membrane	other
-1,222	FAM162A		FAM162A	family with sequence similarity 162, member A	Cytoplasm	other
-1,476	FAM198B		FAM198B	family with sequence similarity 198, member B	Cytoplasm	other
1,598	FAM32A		FAM32A	family with sequence similarity 32, member A	Nucleus	other
1,514	FAM35A		FAM35A	family with sequence similarity 35, member A	Extracellular Space	other
-1,430	FAM60A		FAM60A	family with sequence similarity 60, member A	Extracellular Space	other
-1,352	FAM96B		FAM96B	family with sequence similarity 96, member B	Cytoplasm	other
1,141	FASN		FASN	fatty acid synthase	Cytoplasm	enzyme	orlistat, cerulenin
-1,310	FAU		FAU	Finkel-Biskis-Reilly murine sarcoma virus (FBR-MuSV) ubiquitously expressed	Cytoplasm	other
-1,328	FBL		FBL	fibrillarin	Nucleus	other
1,298	FBXL17		FBXL17	F-box and leucine-rich repeat protein 17	Other	other
1,507	FBXW5		FBXW5	F-box and WD repeat domain containing 5	Cytoplasm	other
2,011	FGFRL1		FGFRL1	fibroblast growth factor receptor-like 1	Plasma Membrane	transmembrane receptor
-1,297	FH		FH	fumarate hydratase	Cytoplasm	enzyme
-1,306	FKBP4		FKBP4	FK506 binding protein 4, 59kDa	Nucleus	enzyme
1,222	FKBP8		FKBP8	FK506 binding protein 8, 38kDa	Cytoplasm	other
1,432	FLNB		FLNB	filamin B, beta	Cytoplasm	other
1,467	FLOT2		FLOT2	flotillin 2	Plasma Membrane	other
1,506	FOLH1		FOLH1	folate hydrolase (prostate-specific membrane antigen) 1	Plasma Membrane	peptidase	capromab pendetide
1,161	FOXA1		FOXA1	forkhead box A1	Nucleus	transcription regulator
2,435	FOXP4		FOXP4	forkhead box P4	Nucleus	transcription regulator
1,310	FTH1		FTH1	ferritin, heavy polypeptide 1	Cytoplasm	enzyme
1,122	FTL		FTL	ferritin, light polypeptide	Cytoplasm	enzyme
1,519	FXYD3		FXYD3	FXYD domain containing ion transport regulator 3	Plasma Membrane	other
-1,479	G3BP1		G3BP1	GTPase activating protein (SH3 domain) binding protein 1	Nucleus	enzyme
1,413	G3BP2		G3BP2	GTPase activating protein (SH3 domain) binding protein 2	Cytoplasm	enzyme
-1,442	GABARAPL1		GABARAPL1	GABA(A) receptor-associated protein like 1	Cytoplasm	other
-3,078	GAGE12H	D	GAGE1 (includes others)	G antigen 1	Other	other
-2,135	GAGE2C	D	GAGE1 (includes others)	G antigen 1	Other	other
-1,522	GAGE2A	D	GAGE1 (includes others)	G antigen 1	Other	other
2,233	GAGE12I	D	GAGE1 (includes others)	G antigen 1	Other	other
-2,785	GAGE12B		GAGE12B/GAGE8	G antigen 8	Other	other
-4,045	GAGE4		GAGE4	G antigen 4	Other	other
-2,063	GAL		GAL	galanin/GMAP prepropeptide	Extracellular Space	other
3,469	GALNT10		GALNT10	polypeptide N-acetylgalactosaminyltransferase 10	Cytoplasm	enzyme
1,365	GANAB		GANAB	glucosidase, alpha; neutral AB	Cytoplasm	enzyme	miglitol
-1,293	GAPDH		GAPDH	glyceraldehyde-3-phosphate dehydrogenase	Cytoplasm	enzyme
-1,411	GAS5		GAS5	growth arrest-specific 5 (non-protein coding)	Other	other
1,430	GBF1		GBF1	golgi brefeldin A resistant guanine nucleotide exchange factor 1	Cytoplasm	other
-1,305	GDF15		GDF15	growth differentiation factor 15	Extracellular Space	growth factor
-1,217	GDI2		GDI2	GDP dissociation inhibitor 2	Cytoplasm	other
-2,545	GDPD1		GDPD1	glycerophosphodiester phosphodiesterase domain containing 1	Other	enzyme
-1,221	GGCT		GGCT	gamma-glutamylcyclotransferase	Cytoplasm	enzyme
1,974	GGT1		GGT1	gamma-glutamyltransferase 1	Plasma Membrane	enzyme
-1,324	GLO1		GLO1	glyoxalase I	Cytoplasm	enzyme
-1,279	GNB2L1		GNB2L1	guanine nucleotide binding protein (G protein), beta polypeptide 2-like 1	Cytoplasm	enzyme
-1,523	GNG10		GNG10	guanine nucleotide binding protein (G protein), gamma 10	Plasma Membrane	enzyme
-1,322	GNL3		GNL3	guanine nucleotide binding protein-like 3 (nucleolar)	Nucleus	other
1,413	GPAA1		GPAA1	glycosylphosphatidylinositol anchor attachment 1	Cytoplasm	enzyme
2,204	GPC5-AS1		GPC5-AS1	GPC5 antisense RNA 1	Other	other
6,238	GPNMB		GPNMB	glycoprotein (transmembrane) nmb	Plasma Membrane	enzyme
2,125	GPR137B		GPR137B	G protein-coupled receptor 137B	Plasma Membrane	other
1,200	GPX1		GPX1	glutathione peroxidase 1	Cytoplasm	enzyme
4,272	GRIN3A		GRIN3A	glutamate receptor, ionotropic, N-methyl-D-aspartate 3A	Plasma Membrane	ion channel	dextromethorphan/morphine, neramexane, bicifadine, delucemine, nebostinel, besonprodil, UK-240455, tenocyclidine, dextromethorphan/quinidine, caffeine/ethanol, amitriptyline/ketamine, donepezil/memantine, ethopropazine, ketamine, phencyclidine, amantadine, felbamate, methadone, ethanol, memantine, orphenadrine, cycloserine, aspirin/caffeine/orphenadrine, N-(2-indanyl)glycinamide, procaine, dextro…
-1,257	GSR		GSR	glutathione reductase	Cytoplasm	enzyme	carmustine/prednisone, carmustine
-1,429	GSTO1		GSTO1	glutathione S-transferase omega 1	Cytoplasm	enzyme
1,603	GUCD1		GUCD1	guanylyl cyclase domain containing 1	Other	other
1,859	GUCY1A3		GUCY1A3	guanylate cyclase 1, soluble, alpha 3	Cytoplasm	enzyme	nitroglycerin, isosorbide-5-mononitrate, isosorbide dinitrate, nitroprusside
1,606	GUSBP1		GUSBP1	glucuronidase, beta pseudogene 1	Other	other
1,152	H1F0		H1F0	H1 histone family, member 0	Nucleus	other
1,679	H2AFJ		H2AFJ	H2A histone family, member J	Cytoplasm	other
-1,505	H3F3A	D	H3F3A/H3F3B	H3 histone, family 3A	Nucleus	other
-1,350	H3F3B	D	H3F3A/H3F3B	H3 histone, family 3A	Nucleus	other
2,390	HCP5		HCP5	HLA complex P5 (non-protein coding)	Other	other
-1,284	HDGF		HDGF	hepatoma-derived growth factor	Extracellular Space	growth factor
1,235	HDLBP		HDLBP	high density lipoprotein binding protein	Nucleus	transporter
-1,195	HEBP2		HEBP2	heme binding protein 2	Cytoplasm	other
-1,338	HERC3		HERC3	HECT and RLD domain containing E3 ubiquitin protein ligase 3	Cytoplasm	enzyme
-1,847	HES6		HES6	hes family bHLH transcription factor 6	Nucleus	transcription regulator
-1,202	HINT1		HINT1	histidine triad nucleotide binding protein 1	Nucleus	enzyme
1,131	HIST1H1C		HIST1H1C	histone cluster 1, H1c	Nucleus	other
2,027	HIST1H2BC		HIST1H2BC	histone cluster 1, H2bc	Nucleus	other
1,472	HIST1H2BD		HIST1H2BD	histone cluster 1, H2bd	Nucleus	other
1,769	HIST1H2BG		HIST1H2BG	histone cluster 1, H2bg	Nucleus	other
1,640	HIST1H4H		HIST1H4H	histone cluster 1, H4h	Nucleus	other
1,382	HIST2H2AA3		HIST2H2AA3/HIST2H2AA4	histone cluster 2, H2aa3	Nucleus	other
13,565	HIST2H2AB		HIST2H2AB	histone cluster 2, H2ab	Nucleus	other
8,116	HIST3H2BB		HIST3H2BB	histone cluster 3, H2bb	Nucleus	other
1,589	HLA-A		HLA-A	major histocompatibility complex, class I, A	Plasma Membrane	other
1,582	HLA-B		HLA-B	major histocompatibility complex, class I, B	Plasma Membrane	transmembrane receptor
1,476	HLA-C		HLA-C	major histocompatibility complex, class I, C	Plasma Membrane	other
-1,618	HMGA1		HMGA1	high mobility group AT-hook 1	Nucleus	transcription regulator
-1,695	HMGB1		HMGB1	high mobility group box 1	Nucleus	transcription regulator
-1,519	HMGB2		HMGB2	high mobility group box 2	Nucleus	transcription regulator
-1,729	HMOX1		HMOX1	heme oxygenase (decycling) 1	Cytoplasm	enzyme	tin mesoporphyrin
1,168	HN1L		HN1L	hematological and neurological expressed 1-like	Cytoplasm	other
-1,202	HNRNPA2B1		HNRNPA2B1	heterogeneous nuclear ribonucleoprotein A2/B1	Nucleus	other
-1,419	HNRNPC		HNRNPC	heterogeneous nuclear ribonucleoprotein C (C1/C2)	Nucleus	other
-1,209	HNRNPF		HNRNPF	heterogeneous nuclear ribonucleoprotein F	Nucleus	other
-1,251	HNRNPK		HNRNPK	heterogeneous nuclear ribonucleoprotein K	Nucleus	other
3,375	HPGD		HPGD	hydroxyprostaglandin dehydrogenase 15-(NAD)	Cytoplasm	enzyme
-1,537	HSD11B2		HSD11B2	hydroxysteroid (11-beta) dehydrogenase 2	Cytoplasm	enzyme
1,495	HSDL2		HSDL2	hydroxysteroid dehydrogenase like 2	Cytoplasm	transporter
-1,343	HSP90AA1		HSP90AA1	heat shock protein 90kDa alpha (cytosolic), class A member 1	Cytoplasm	enzyme	alvespimycin, retaspimycin, luminespib, cisplatin
-1,328	HSP90AB1		HSP90AB1	heat shock protein 90kDa alpha (cytosolic), class B member 1	Cytoplasm	enzyme	alvespimycin, retaspimycin, cisplatin
-1,237	HSP90B1		HSP90B1	heat shock protein 90kDa beta (Grp94), member 1	Cytoplasm	other	alvespimycin, retaspimycin, cisplatin
-1,234	HSPA5		HSPA5	heat shock 70kDa protein 5 (glucose-regulated protein, 78kDa)	Cytoplasm	enzyme
-1,222	HSPA8		HSPA8	heat shock 70kDa protein 8	Cytoplasm	enzyme
-1,222	HSPA8		HSPA8	heat shock 70kDa protein 8	Cytoplasm	enzyme
-1,268	HSPB1		HSPB1	heat shock 27kDa protein 1	Cytoplasm	other
-1,170	HSPD1		HSPD1	heat shock 60kDa protein 1 (chaperonin)	Cytoplasm	enzyme
-1,280	HSPH1		HSPH1	heat shock 105kDa/110kDa protein 1	Cytoplasm	other
1,309	IDH1		IDH1	isocitrate dehydrogenase 1 (NADP+), soluble	Cytoplasm	enzyme
-1,452	IDH3B		IDH3B	isocitrate dehydrogenase 3 (NAD+) beta	Cytoplasm	enzyme
1,398	IFI6		IFI6	interferon, alpha-inducible protein 6	Cytoplasm	other
2,056	IFT57		IFT57	intraflagellar transport 57	Cytoplasm	other
1,587	IGF2R		IGF2R	insulin-like growth factor 2 receptor	Plasma Membrane	transmembrane receptor
2,616	IGFBP3		IGFBP3	insulin-like growth factor binding protein 3	Extracellular Space	other
-1,386	ILF2		ILF2	interleukin enhancer binding factor 2	Nucleus	transcription regulator
-1,538	IMP4		IMP4	IMP4, U3 small nucleolar ribonucleoprotein	Nucleus	other
-1,255	IMPDH2		IMPDH2	IMP (inosine 5'-monophosphate) dehydrogenase 2	Cytoplasm	enzyme	thioguanine, VX-944, pegintron/ribavirin, interferon alfa-2b/ribavirin, mycophenolate mofetil, mycophenolic acid, ribavirin
1,481	IRAK1		IRAK1	interleukin-1 receptor-associated kinase 1	Plasma Membrane	kinase
1,935	ISY1-RAB43		ISY1-RAB43	ISY1-RAB43 readthrough	Nucleus	other
1,246	ITM2B		ITM2B	integral membrane protein 2B	Plasma Membrane	other
1,335	KCNN2		KCNN2	potassium channel, calcium activated intermediate/small conductance subfamily N alpha, member 2	Plasma Membrane	ion channel
-1,392	KDELR2		KDELR2	KDEL (Lys-Asp-Glu-Leu) endoplasmic reticulum protein retention receptor 2	Cytoplasm	other
-1,322	KDM1A		KDM1A	lysine (K)-specific demethylase 1A	Nucleus	enzyme
1,533	KDM2A		KDM2A	lysine (K)-specific demethylase 2A	Nucleus	other
1,393	KDM4B		KDM4B	lysine (K)-specific demethylase 4B	Nucleus	other
-1,266	KDM6A		KDM6A	lysine (K)-specific demethylase 6A	Nucleus	other
1,303	KIAA0100		KIAA0100	KIAA0100	Extracellular Space	other
2,100	KIAA0513		KIAA0513	KIAA0513	Other	other
1,782	KIAA1217		KIAA1217	KIAA1217	Cytoplasm	other
5,066	KIAA1324		KIAA1324	KIAA1324	Plasma Membrane	other
1,763	KIAA1522		KIAA1522	KIAA1522	Other	other
1,559	KIAA1598		KIAA1598	KIAA1598	Plasma Membrane	other
1,527	KIF1C		KIF1C	kinesin family member 1C	Cytoplasm	other
4,844	KITLG		KITLG	KIT ligand	Extracellular Space	growth factor
-1,457	KLK2		KLK2	kallikrein-related peptidase 2	Extracellular Space	peptidase
-1,233	KLK3		KLK3	kallikrein-related peptidase 3	Extracellular Space	peptidase
1,344	KLK4		KLK4	kallikrein-related peptidase 4	Extracellular Space	peptidase
-1,280	KPNA2		KPNA2	karyopherin alpha 2 (RAG cohort 1, importin alpha 1)	Nucleus	transporter
13,101	KRT20		KRT20	keratin 20, type I	Cytoplasm	other
1,163	KRT8		KRT8	keratin 8, type II	Cytoplasm	other
1,295	LAD1		LAD1	ladinin 1	Extracellular Space	other
-1,624	LAMA3		LAMA3	laminin, alpha 3	Extracellular Space	other
1,366	LAMB2		LAMB2	laminin, beta 2 (laminin S)	Extracellular Space	enzyme
1,437	LAMC1		LAMC1	laminin, gamma 1 (formerly LAMB2)	Extracellular Space	other
-1,416	LAPTM4B		LAPTM4B	lysosomal protein transmembrane 4 beta	Other	other
-1,229	LDHA		LDHA	lactate dehydrogenase A	Cytoplasm	enzyme
-1,256	LDHB		LDHB	lactate dehydrogenase B	Cytoplasm	enzyme
1,473	LDOC1		LDOC1	leucine zipper, down-regulated in cancer 1	Nucleus	other
-1,503	LEO1		LEO1	Leo1, Paf1/RNA polymerase II complex component, homolog (S. cerevisiae)	Nucleus	other
2,314	LEPROT		LEPROT	leptin receptor overlapping transcript	Plasma Membrane	other
2,606	LINC00087		LINC00087	long intergenic non-protein coding RNA 87	Other	other
-1,322	LINC00493		LINC00493	long intergenic non-protein coding RNA 493	Other	other
-1,457	LMAN1		LMAN1	lectin, mannose-binding, 1	Cytoplasm	other
2,545	LPAL2		LPAL2	lipoprotein, Lp(a)-like 2, pseudogene	Other	other
-2,123	LPAR3		LPAR3	lysophosphatidic acid receptor 3	Plasma Membrane	G-protein coupled receptor
2,996	LPXN		LPXN	leupaxin	Cytoplasm	transcription regulator
1,524	LRP3		LRP3	low density lipoprotein receptor-related protein 3	Plasma Membrane	transmembrane receptor
-1,448	LRRC58		LRRC58	leucine rich repeat containing 58	Other	other
4,561	LRRC7		LRRC7	leucine rich repeat containing 7	Plasma Membrane	other
-1,257	C17orf76-AS1		LRRC75A-AS1	LRRC75A antisense RNA 1	Other	other
1,402	LSR		LSR	lipolysis stimulated lipoprotein receptor	Nucleus	transcription regulator
1,416	LUZP2		LUZP2	leucine zipper protein 2	Other	other
-1,570	LYPLA2		LYPLA2	lysophospholipase II	Cytoplasm	enzyme
3,086	LYST		LYST	lysosomal trafficking regulator	Cytoplasm	transporter
-1,926	MAD2L1		MAD2L1	MAD2 mitotic arrest deficient-like 1 (yeast)	Nucleus	other
-1,357	MAGEA6		MAGEA3/MAGEA6	melanoma antigen family A6	Other	other
1,720	MAN2B1		MAN2B1	mannosidase, alpha, class 2B, member 1	Cytoplasm	enzyme
-1,152	MAOA		MAOA	monoamine oxidase A	Cytoplasm	enzyme	ladostigil, CX-1370, moclobemide, phentermine/topiramate, fenfluramine/phentermine, methamphetamine, dextroamphetamine, procainamide, tranylcypromine, phenelzine, iproniazid, isocarboxazid, phentermine, benzphetamine, N-(2-indanyl)glycinamide
1,662	MAPK8IP1		MAPK8IP1	mitogen-activated protein kinase 8 interacting protein 1	Cytoplasm	other
1,738	MARCH2		MARCH2	membrane-associated ring finger (C3HC4) 2, E3 ubiquitin protein ligase	Cytoplasm	enzyme
2,429	MAST4		MAST4	microtubule associated serine/threonine kinase family member 4	Other	kinase
-1,218	MAT2A		MAT2A	methionine adenosyltransferase II, alpha	Cytoplasm	enzyme
1,342	MAZ		MAZ	MYC-associated zinc finger protein (purine-binding transcription factor)	Nucleus	transcription regulator
-15,885	MB		MB	myoglobin	Cytoplasm	transporter
1,327	MCCC2		MCCC2	methylcrotonoyl-CoA carboxylase 2 (beta)	Cytoplasm	enzyme
-1,614	MCFD2		MCFD2	multiple coagulation factor deficiency 2	Cytoplasm	other
-1,365	MCM7		MCM7	minichromosome maintenance complex component 7	Nucleus	enzyme
-2,299	MDK		MDK	midkine (neurite growth-promoting factor 2)	Extracellular Space	growth factor
1,474	MGAT1		MGAT1	mannosyl (alpha-1,3-)-glycoprotein beta-1,2-N-acetylglucosaminyltransferase	Cytoplasm	enzyme
1,179	MIF		MIF	macrophage migration inhibitory factor (glycosylation-inhibiting factor)	Extracellular Space	cytokine
13,588	MINOS1		MINOS1	mitochondrial inner membrane organizing system 1	Cytoplasm	other
2,768	MIR497HG		MIR497HG	mir-497-195 cluster host gene (non-protein coding)	Other	other
1,187	MKNK2		MKNK2	MAP kinase interacting serine/threonine kinase 2	Cytoplasm	kinase
1,435	MLLT1		MLLT1	myeloid/lymphoid or mixed-lineage leukemia (trithorax homolog, Drosophila); translocated to, 1	Nucleus	transcription regulator
-1,366	MME		MME	membrane metallo-endopeptidase	Plasma Membrane	peptidase
-1,325	MORF4L1		MORF4L1	mortality factor 4 like 1	Nucleus	other
-1,359	MORF4L2		MORF4L2	mortality factor 4 like 2	Nucleus	other
-1,463	MPLKIP		MPLKIP	M-phase specific PLK1 interacting protein	Nucleus	other
1,356	MPZL1		MPZL1	myelin protein zero-like 1	Plasma Membrane	other
1,146	MRFAP1		MRFAP1	Morf4 family associated protein 1	Nucleus	other
1,220	MRFAP1L1		MRFAP1L1	Morf4 family associated protein 1-like 1	Other	other
-1,317	MRPL17		MRPL17	mitochondrial ribosomal protein L17	Cytoplasm	other
-1,638	MRPL18		MRPL18	mitochondrial ribosomal protein L18	Cytoplasm	translation regulator
-1,476	MRPL32		MRPL32	mitochondrial ribosomal protein L32	Cytoplasm	translation regulator
-1,447	MRPL37		MRPL37	mitochondrial ribosomal protein L37	Cytoplasm	enzyme
-1,657	MRPL40		MRPL40	mitochondrial ribosomal protein L40	Cytoplasm	other
-1,351	MRPL42		MRPL42	mitochondrial ribosomal protein L42	Cytoplasm	other
-1,441	MRPL45		MRPL45	mitochondrial ribosomal protein L45	Cytoplasm	other
-1,231	MRPL51		MRPL51	mitochondrial ribosomal protein L51	Cytoplasm	other
-1,374	MRPL54		MRPL54	mitochondrial ribosomal protein L54	Cytoplasm	other
-1,648	MRPS18A		MRPS18A	mitochondrial ribosomal protein S18A	Cytoplasm	other
-1,399	MRPS23		MRPS23	mitochondrial ribosomal protein S23	Cytoplasm	other
-1,263	MRPS35		MRPS35	mitochondrial ribosomal protein S35	Cytoplasm	other
-1,065	MT-CO1		MT-CO1	cytochrome c oxidase subunit I	Cytoplasm	enzyme
1,167	MT-CO2		MT-CO2	cytochrome c oxidase subunit II	Cytoplasm	enzyme
1,167	MT-CO2		MT-CO2	cytochrome c oxidase subunit II	Cytoplasm	enzyme
1,104	MT-ND3		MT-ND3	NADH dehydrogenase, subunit 3 (complex I)	Cytoplasm	enzyme
1,220	MT-ND5		MT-ND5	NADH dehydrogenase, subunit 5 (complex I)	Cytoplasm	enzyme
1,101	MT-ND6		MT-ND6	NADH dehydrogenase, subunit 6 (complex I)	Cytoplasm	enzyme
1,699	MT1G		MT1G	metallothionein 1G	Other	other
1,562	MT2A		MT2A	metallothionein 2A	Cytoplasm	other
-1,633	MTHFD2		MTHFD2	methylenetetrahydrofolate dehydrogenase (NADP+ dependent) 2, methenyltetrahydrofolate cyclohydrolase	Cytoplasm	enzyme
1,426	MUT		MUT	methylmalonyl CoA mutase	Cytoplasm	enzyme	hydroxocobalamin, cyanocobalamin
-1,446	MXI1		MXI1	MAX interactor 1, dimerization protein	Nucleus	transcription regulator
2,859	MYBPC1		MYBPC1	myosin binding protein C, slow type	Cytoplasm	other
-1,568	MYC		MYC	v-myc avian myelocytomatosis viral oncogene homolog	Nucleus	transcription regulator
1,346	MYH9		MYH9	myosin, heavy chain 9, non-muscle	Cytoplasm	enzyme
-1,303	MYO6		MYO6	myosin VI	Cytoplasm	other
1,714	NAAA		NAAA	N-acylethanolamine acid amidase	Cytoplasm	enzyme
-1,233	NACA		NACA	nascent polypeptide-associated complex alpha subunit	Cytoplasm	transcription regulator
1,368	NACC1		NACC1	nucleus accumbens associated 1, BEN and BTB (POZ) domain containing	Nucleus	transcription regulator
-1,246	NAP1L1		NAP1L1	nucleosome assembly protein 1-like 1	Nucleus	other
1,205	NCAM2		NCAM2	neural cell adhesion molecule 2	Plasma Membrane	other
-1,346	NCL		NCL	nucleolin	Nucleus	other
-1,203	NDRG1		NDRG1	N-myc downstream regulated 1	Nucleus	kinase
-1,210	NDUFA1		NDUFA1	NADH dehydrogenase (ubiquinone) 1 alpha subcomplex, 1, 7.5kDa	Cytoplasm	enzyme
-1,363	NDUFA4		NDUFA4	NDUFA4, mitochondrial complex associated	Cytoplasm	enzyme
-1,283	NDUFAB1		NDUFAB1	NADH dehydrogenase (ubiquinone) 1, alpha/beta subcomplex, 1, 8kDa	Cytoplasm	enzyme
-1,565	NDUFAF2		NDUFAF2	NADH dehydrogenase (ubiquinone) complex I, assembly factor 2	Cytoplasm	enzyme
-1,371	NDUFB11		NDUFB11	NADH dehydrogenase (ubiquinone) 1 beta subcomplex, 11, 17.3kDa	Cytoplasm	enzyme
-1,313	NDUFB3		NDUFB3	NADH dehydrogenase (ubiquinone) 1 beta subcomplex, 3, 12kDa	Cytoplasm	enzyme
-1,600	NDUFB4		NDUFB4	NADH dehydrogenase (ubiquinone) 1 beta subcomplex, 4, 15kDa	Cytoplasm	transporter
1,462	NDUFC2-KCTD14		NDUFC2-KCTD14	NDUFC2-KCTD14 readthrough	Other	other
-1,209	NDUFS5		NDUFS5	NADH dehydrogenase (ubiquinone) Fe-S protein 5, 15kDa (NADH-coenzyme Q reductase)	Cytoplasm	enzyme
3,252	NEDD8		NEDD8	neural precursor cell expressed, developmentally down-regulated 8	Nucleus	enzyme
-2,133	NEDD8-MDP1		NEDD8-MDP1	NEDD8-MDP1 readthrough	Other	other
1,640	NETO1		NETO1	neuropilin (NRP) and tolloid (TLL)-like 1	Extracellular Space	other
1,317	NFE2L1		NFE2L1	nuclear factor, erythroid 2-like 1	Nucleus	transcription regulator
-1,478	MKI67IP		NIFK	nucleolar protein interacting with the FHA domain of MKI67	Nucleus	other
-2,359	NIP7		NIP7	NIP7, nucleolar pre-rRNA processing protein	Nucleus	other
-1,426	NIPA2		NIPA2	non imprinted in Prader-Willi/Angelman syndrome 2	Cytoplasm	other
2,043	NIPAL2		NIPAL2	NIPA-like domain containing 2	Other	other
1,175	NKX3-1		NKX3-1	NK3 homeobox 1	Nucleus	transcription regulator
-1,391	NME2		NME2	NME/NM23 nucleoside diphosphate kinase 2	Nucleus	kinase
-1,508	NOB1		NOB1	NIN1/RPN12 binding protein 1 homolog (S. cerevisiae)	Nucleus	other
1,272	NOLC1		NOLC1	nucleolar and coiled-body phosphoprotein 1	Nucleus	transcription regulator
-1,204	NONO		NONO	non-POU domain containing, octamer-binding	Nucleus	other
-1,339	NOP56		NOP56	NOP56 ribonucleoprotein	Nucleus	other
-1,430	NOP58		NOP58	NOP58 ribonucleoprotein	Nucleus	enzyme
3,768	NOS3		NOS3	nitric oxide synthase 3 (endothelial cell)	Cytoplasm	enzyme	5,6,7,8-tetrahydrobiopterin, GW 273629, targinine
-1,605	NPC1		NPC1	Niemann-Pick disease, type C1	Cytoplasm	transporter
-1,553	NPM1		NPM1	nucleophosmin (nucleolar phosphoprotein B23, numatrin)	Nucleus	transcription regulator
-5,151	NPPC		NPPC	natriuretic peptide C	Extracellular Space	other
-1,621	NR2C2AP		NR2C2AP	nuclear receptor 2C2-associated protein	Nucleus	other
-3,166	NRN1		NRN1	neuritin 1	Cytoplasm	other
-1,503	NSA2		NSA2	NSA2 ribosome biogenesis homolog (S. cerevisiae)	Nucleus	other
-1,653	NUCKS1		NUCKS1	nuclear casein kinase and cyclin-dependent kinase substrate 1	Nucleus	kinase
-1,410	NUDCD2		NUDCD2	NudC domain containing 2	Cytoplasm	other
1,381	NUMA1		NUMA1	nuclear mitotic apparatus protein 1	Nucleus	other
-1,611	NUPL1		NUPL1	nucleoporin like 1	Nucleus	transporter
-1,156	OAZ1		OAZ1	ornithine decarboxylase antizyme 1	Cytoplasm	enzyme
-1,266	ODC1		ODC1	ornithine decarboxylase 1	Cytoplasm	enzyme	tazarotene, eflornithine
2,271	OGFR		OGFR	opioid growth factor receptor	Plasma Membrane	other	enkephalin, methionine
-1,890	OIP5		OIP5	Opa interacting protein 5	Nucleus	other
-1,478	OLA1		OLA1	Obg-like ATPase 1	Cytoplasm	other
-1,474	ORC5		ORC5	origin recognition complex, subunit 5	Nucleus	other
2,027	OSBPL5		OSBPL5	oxysterol binding protein-like 5	Cytoplasm	other
2,548	OSR2		OSR2	odd-skipped related transciption factor 2	Nucleus	transcription regulator
1,350	OSTF1		OSTF1	osteoclast stimulating factor 1	Nucleus	transcription regulator
1,391	OXCT1		OXCT1	3-oxoacid CoA transferase 1	Cytoplasm	enzyme
1,154	P4HB		P4HB	prolyl 4-hydroxylase, beta polypeptide	Cytoplasm	enzyme
-1,119	PABPC1		PABPC1	poly(A) binding protein, cytoplasmic 1	Cytoplasm	translation regulator
1,802	PACS1		PACS1	phosphofurin acidic cluster sorting protein 1	Cytoplasm	other
1,345	PACSIN2		PACSIN2	protein kinase C and casein kinase substrate in neurons 2	Cytoplasm	transporter
2,774	PAG1		PAG1	phosphoprotein membrane anchor with glycosphingolipid microdomains 1	Plasma Membrane	other
1,767	PAGR1		PAGR1	PAXIP1 associated glutamate-rich protein 1	Nucleus	other
-1,191	PAICS		PAICS	phosphoribosylaminoimidazole carboxylase, phosphoribosylaminoimidazole succinocarboxamide synthetase	Cytoplasm	enzyme
-1,450	PAK1IP1		PAK1IP1	PAK1 interacting protein 1	Nucleus	other
-1,301	PARK7		PARK7	parkinson protein 7	Nucleus	enzyme
-1,438	PBK		PBK	PDZ binding kinase	Cytoplasm	kinase
-1,243	PCBP1		PCBP1	poly(rC) binding protein 1	Nucleus	translation regulator
-1,286	PDIA4		PDIA4	protein disulfide isomerase family A, member 4	Cytoplasm	enzyme
2,389	PDXP		PDXP	pyridoxal (pyridoxine, vitamin B6) phosphatase	Plasma Membrane	phosphatase
1,293	PEA15		PEA15	phosphoprotein enriched in astrocytes 15	Cytoplasm	transporter
-1,214	PEBP1		PEBP1	phosphatidylethanolamine binding protein 1	Cytoplasm	other
1,524	PEG3		PEG3	paternally expressed 3	Nucleus	kinase
2,355	PERP		PERP	PERP, TP53 apoptosis effector	Plasma Membrane	other
-1,313	PFDN2		PFDN2	prefoldin subunit 2	Cytoplasm	other
-1,798	PFDN4		PFDN4	prefoldin subunit 4	Cytoplasm	other
1,653	PFKL		PFKL	phosphofructokinase, liver	Cytoplasm	kinase
1,214	PFKP		PFKP	phosphofructokinase, platelet	Cytoplasm	kinase
-1,187	PGAM1		PGAM1	phosphoglycerate mutase 1 (brain)	Cytoplasm	phosphatase
-1,315	PGK1		PGK1	phosphoglycerate kinase 1	Cytoplasm	kinase
1,458	PGM1		PGM1	phosphoglucomutase 1	Cytoplasm	enzyme
-1,338	PHB2		PHB2	prohibitin 2	Cytoplasm	transcription regulator
-1,448	PHF23		PHF23	PHD finger protein 23	Other	other
-6,251	PIGC		PIGC	phosphatidylinositol glycan anchor biosynthesis, class C	Cytoplasm	enzyme
1,690	PIK3CD		PIK3CD	phosphatidylinositol-4,5-bisphosphate 3-kinase, catalytic subunit delta	Cytoplasm	kinase	SF 1126, PX-866, dactolisib, GDC-0941, buparlisib, XL147, idelalisib, idelalisib/rituximab
1,813	PINK1		PINK1	PTEN induced putative kinase 1	Cytoplasm	kinase
1,922	PKIB		PKIB	protein kinase (cAMP-dependent, catalytic) inhibitor beta	Other	other
1,491	PKN1		PKN1	protein kinase N1	Cytoplasm	kinase
2,136	PLA2G4F		PLA2G4F	phospholipase A2, group IVF	Cytoplasm	enzyme
2,789	PLA2G5		PLA2G5	phospholipase A2, group V	Extracellular Space	enzyme	varespladib methyl, varespladib
1,798	PLEC		PLEC	plectin	Cytoplasm	other
1,276	PLEKHB1		PLEKHB1	pleckstrin homology domain containing, family B (evectins) member 1	Cytoplasm	other
-1,704	PLGRKT		PLGRKT	plasminogen receptor, C-terminal lysine transmembrane protein	Cytoplasm	other
-1,704	PLGRKT		PLGRKT	plasminogen receptor, C-terminal lysine transmembrane protein	Cytoplasm	other
1,619	PMEPA1		PMEPA1	prostate transmembrane protein, androgen induced 1	Plasma Membrane	other
2,472	PMS2P4		PMS2P4	postmeiotic segregation increased 2 pseudogene 4	Other	other
1,832	PNMA1		PNMA1	paraneoplastic Ma antigen 1	Nucleus	other
-1,365	PNN		PNN	pinin, desmosome associated protein	Plasma Membrane	other
-1,686	PNP		PNP	purine nucleoside phosphorylase	Nucleus	enzyme	forodesine, PD 141955
1,318	PODXL2		PODXL2	podocalyxin-like 2	Plasma Membrane	other
-1,505	POLR1E		POLR1E	polymerase (RNA) I polypeptide E, 53kDa	Nucleus	enzyme
-1,454	PPA1		PPA1	pyrophosphatase (inorganic) 1	Cytoplasm	enzyme
-3,195	PPAN-P2RY11		PPAN-P2RY11	PPAN-P2RY11 readthrough	Other	other
1,701	PPDPF		PPDPF	pancreatic progenitor cell differentiation and proliferation factor	Other	other
-1,163	PPIA		PPIA	peptidylprolyl isomerase A (cyclophilin A)	Cytoplasm	enzyme	N-methyl-4-Ile-cyclosporin
2,277	PPIAP22		PPIAP22	peptidylprolyl isomerase A (cyclophilin A) pseudogene 22	Other	enzyme
-1,211	PPIB		PPIB	peptidylprolyl isomerase B (cyclophilin B)	Cytoplasm	enzyme
-1,240	PRAC		PRAC1	prostate cancer susceptibility candidate 1	Other	other
-1,376	PRDX1		PRDX1	peroxiredoxin 1	Cytoplasm	enzyme
-1,199	PRDX2		PRDX2	peroxiredoxin 2	Cytoplasm	enzyme
-1,280	PRDX5		PRDX5	peroxiredoxin 5	Cytoplasm	enzyme	auranofin
-1,362	PRMT5		PRMT5	protein arginine methyltransferase 5	Cytoplasm	enzyme
1,654	PRMT6		PRMT6	protein arginine methyltransferase 6	Nucleus	enzyme
-1,527	PRPF38A		PRPF38A	pre-mRNA processing factor 38A	Nucleus	other
1,287	PRUNE2		PRUNE2	prune homolog 2 (Drosophila)	Other	other
1,602	PSKH1		PSKH1	protein serine kinase H1	Nucleus	kinase
-2,111	PSMA2		PSMA2	proteasome (prosome, macropain) subunit, alpha type, 2	Cytoplasm	peptidase
-1,283	PSMA4		PSMA4	proteasome (prosome, macropain) subunit, alpha type, 4	Cytoplasm	peptidase
-1,258	PSMA7		PSMA7	proteasome (prosome, macropain) subunit, alpha type, 7	Cytoplasm	peptidase
-1,348	PSMB1		PSMB1	proteasome (prosome, macropain) subunit, beta type, 1	Cytoplasm	peptidase	carfilzomib, bortezomib/cladribine/rituximab, bortezomib/sorafenib, bortezomib/paclitaxel, bortezomib/dexamethasone, bortezomib/dexamethasone/doxorubicin, bortezomib/dexamethasone/lenalidomide, bortezomib/dexamethasone/thalidomide, carfilzomib/dexamethasone/lenalidomide, bortezomib/prednisone, bortezomib/doxorubicin, bortezomib/vorinostat, bortezomib/thalidomide, bortezomib/rituximab, bortezomib/…
-1,358	PSMB3		PSMB3	proteasome (prosome, macropain) subunit, beta type, 3	Cytoplasm	peptidase
-1,308	PSMB5		PSMB5	proteasome (prosome, macropain) subunit, beta type, 5	Cytoplasm	peptidase	carfilzomib, bortezomib/cladribine/rituximab, bortezomib/sorafenib, bortezomib/paclitaxel, bortezomib/melphalan, bortezomib/dexamethasone, bortezomib/dexamethasone/doxorubicin, bortezomib/dexamethasone/lenalidomide, bortezomib/dexamethasone/thalidomide, carfilzomib/dexamethasone/lenalidomide, bortezomib/prednisone, bortezomib/doxorubicin, bortezomib/vorinostat, bortezomib/thalidomide, bortezomib/…
-1,353	PSMC4		PSMC4	proteasome (prosome, macropain) 26S subunit, ATPase, 4	Nucleus	peptidase
-1,528	PSMD13		PSMD13	proteasome (prosome, macropain) 26S subunit, non-ATPase, 13	Cytoplasm	peptidase
-1,325	PTGES3		PTGES3	prostaglandin E synthase 3 (cytosolic)	Cytoplasm	enzyme
-2,304	PTGFR		PTGFR	prostaglandin F receptor (FP)	Plasma Membrane	G-protein coupled receptor	(+)-fluprostenol, tafluprost, latanoprost/timolol, travoprost, isopropyl unoprostone, bimatoprost, latanoprost
-1,615	PTGR1		PTGR1	prostaglandin reductase 1	Cytoplasm	enzyme
-1,542	PTMA		PTMA	prothymosin, alpha	Nucleus	other
1,189	PTPRF		PTPRF	protein tyrosine phosphatase, receptor type, F	Plasma Membrane	phosphatase
2,074	PTPRM		PTPRM	protein tyrosine phosphatase, receptor type, M	Plasma Membrane	phosphatase
2,000	PTPRR		PTPRR	protein tyrosine phosphatase, receptor type, R	Plasma Membrane	phosphatase
-1,541	PTTG1		PTTG1	pituitary tumor-transforming 1	Nucleus	transcription regulator
-1,531	PWP1		PWP1	PWP1 homolog (S. cerevisiae)	Nucleus	other
-2,565	PYCR2		PYCR2	pyrroline-5-carboxylate reductase family, member 2	Cytoplasm	enzyme
1,445	PYGB		PYGB	phosphorylase, glycogen; brain	Cytoplasm	enzyme
1,172	RAB1B		RAB1B	RAB1B, member RAS oncogene family	Cytoplasm	other
2,413	RAB27B		RAB27B	RAB27B, member RAS oncogene family	Cytoplasm	enzyme
1,456	RAB7L1		RAB29	RAB29, member RAS oncogene family	Plasma Membrane	enzyme
-3,226	RAB31		RAB31	RAB31, member RAS oncogene family	Cytoplasm	enzyme
1,623	RAC1		RAC1	ras-related C3 botulinum toxin substrate 1 (rho family, small GTP binding protein Rac1)	Plasma Membrane	enzyme
1,367	RAD23A		RAD23A	RAD23 homolog A (S. cerevisiae)	Nucleus	other
-1,431	RAMP1		RAMP1	receptor (G protein-coupled) activity modifying protein 1	Plasma Membrane	transporter	pramlintide
-1,311	RAN		RAN	RAN, member RAS oncogene family	Nucleus	enzyme
-1,465	RANBP1		RANBP1	RAN binding protein 1	Nucleus	other
1,363	RASEF		RASEF	RAS and EF-hand domain containing	Other	other
-1,155	RASSF3		RASSF3	Ras association (RalGDS/AF-6) domain family member 3	Other	other
-1,514	RCN1		RCN1	reticulocalbin 1, EF-hand calcium binding domain	Cytoplasm	other
6,714	RDH12		RDH12	retinol dehydrogenase 12 (all-trans/9-cis/11-cis)	Cytoplasm	enzyme
1,623	REEP5		REEP5	receptor accessory protein 5	Extracellular Space	transporter
-1,721	RFC3		RFC3	replication factor C (activator 1) 3, 38kDa	Nucleus	enzyme
5,529	RFX6		RFX6	regulatory factor X, 6	Nucleus	enzyme
2,815	RGS2		RGS2	regulator of G-protein signaling 2	Nucleus	other
-1,485	RHEB		RHEB	Ras homolog enriched in brain	Cytoplasm	enzyme
1,494	RHOU		RHOU	ras homolog family member U	Cytoplasm	enzyme
1,611	RIPK2		RIPK2	receptor-interacting serine-threonine kinase 2	Plasma Membrane	kinase
1,512	RIT1		RIT1	Ras-like without CAAX 1	Plasma Membrane	enzyme
2,651	RNASEK		RNASEK	ribonuclease, RNase K	Other	peptidase
1,299	RNF10		RNF10	ring finger protein 10	Cytoplasm	enzyme
1,224	RNF11		RNF11	ring finger protein 11	Cytoplasm	enzyme
1,791	RNF144A		RNF144A	ring finger protein 144A	Nucleus	other
1,178	RNF187		RNF187	ring finger protein 187	Nucleus	enzyme
-2,019	RNF38		RNF38	ring finger protein 38	Nucleus	enzyme
1,735	RNPEPL1		RNPEPL1	arginyl aminopeptidase (aminopeptidase B)-like 1	Other	peptidase
1,350	ROMO1		ROMO1	reactive oxygen species modulator 1	Cytoplasm	other
-2,428	RPA1		RPA1	replication protein A1, 70kDa	Nucleus	other
-1,310	RPF1		RPF1	ribosome production factor 1 homolog (S. cerevisiae)	Nucleus	other
-1,514	RPF2		RPF2	ribosome production factor 2 homolog (S. cerevisiae)	Nucleus	other
-1,213	RPL10		RPL10	ribosomal protein L10	Cytoplasm	other
-1,251	RPL10A		RPL10A	ribosomal protein L10a	Nucleus	other
-1,160	RPL11		RPL11	ribosomal protein L11	Cytoplasm	other
-1,425	RPL12		RPL12	ribosomal protein L12	Nucleus	other
-1,155	RPL13		RPL13	ribosomal protein L13	Cytoplasm	other
-1,256	RPL13A		RPL13A	ribosomal protein L13a	Cytoplasm	other
-1,502	RPL14		RPL14	ribosomal protein L14	Cytoplasm	other
1,881	RPL15P3		RPL15P3	ribosomal protein L15 pseudogene 3	Other	other
-1,326	RPL17		RPL17	ribosomal protein L17	Cytoplasm	other
-3,566	RPL17-C18orf32		RPL17-C18orf32	RPL17-C18orf32 readthrough	Other	other
-1,304	RPL18		RPL18	ribosomal protein L18	Cytoplasm	other
-1,249	RPL19		RPL19	ribosomal protein L19	Cytoplasm	other
-1,351	RPL22		RPL22	ribosomal protein L22	Nucleus	other
-1,435	RPL22L1		RPL22L1	ribosomal protein L22-like 1	Other	other
-1,338	RPL23		RPL23	ribosomal protein L23	Cytoplasm	other
-1,517	RPL24		RPL24	ribosomal protein L24	Cytoplasm	other
-1,306	RPL27		RPL27	ribosomal protein L27	Cytoplasm	other
-1,272	RPL27A		RPL27A	ribosomal protein L27a	Nucleus	other
-1,305	RPL29		RPL29	ribosomal protein L29	Cytoplasm	other
-1,238	RPL3		RPL3	ribosomal protein L3	Cytoplasm	other	omacetaxine mepesuccinate
-1,259	RPL30		RPL30	ribosomal protein L30	Cytoplasm	other
-1,249	RPL31		RPL31	ribosomal protein L31	Cytoplasm	other
-1,312	RPL32		RPL32	ribosomal protein L32	Cytoplasm	other
-1,467	RPL34		RPL34	ribosomal protein L34	Cytoplasm	other
-1,307	RPL35		RPL35	ribosomal protein L35	Cytoplasm	other
-1,509	RPL35A		RPL35A	ribosomal protein L35a	Cytoplasm	other
-1,193	RPL36		RPL36	ribosomal protein L36	Cytoplasm	other
-1,193	RPL36		RPL36	ribosomal protein L36	Cytoplasm	other
-1,405	RPL36AL		RPL36AL	ribosomal protein L36a-like	Cytoplasm	other
-1,300	RPL38		RPL38	ribosomal protein L38	Cytoplasm	other
-1,391	RPL39		RPL39	ribosomal protein L39	Cytoplasm	other
-1,495	RPL4		RPL4	ribosomal protein L4	Cytoplasm	enzyme
-1,233	RPL41		RPL41	ribosomal protein L41	Cytoplasm	other
-1,315	RPL5		RPL5	ribosomal protein L5	Cytoplasm	other
-1,302	RPL6		RPL6	ribosomal protein L6	Cytoplasm	other
-3,817	RPL6P27		RPL6P27	ribosomal protein L6 pseudogene 27	Other	other
-1,454	RPL7		RPL7	ribosomal protein L7	Nucleus	transcription regulator
-1,301	RPL7A		RPL7A	ribosomal protein L7a	Cytoplasm	other
-1,161	RPL8		RPL8	ribosomal protein L8	Other	other
-1,513	RPL9		RPL9	ribosomal protein L9	Cytoplasm	other
-1,306	RPS10		RPS10	ribosomal protein S10	Cytoplasm	other
-1,243	RPS11		RPS11	ribosomal protein S11	Cytoplasm	other
-1,146	RPS12		RPS12	ribosomal protein S12	Cytoplasm	other
-1,210	RPS13		RPS13	ribosomal protein S13	Other	other
-1,318	RPS14		RPS14	ribosomal protein S14	Cytoplasm	translation regulator
-1,458	RPS15A		RPS15A	ribosomal protein S15a	Cytoplasm	other
-1,219	RPS16		RPS16	ribosomal protein S16	Cytoplasm	other
-1,669	RPS17L		RPS17	ribosomal protein S17	Cytoplasm	other
-1,363	RPS18		RPS18	ribosomal protein S18	Cytoplasm	other
-1,181	RPS2		RPS2	ribosomal protein S2	Cytoplasm	other
-1,165	RPS20		RPS20	ribosomal protein S20	Cytoplasm	other
-1,197	RPS21		RPS21	ribosomal protein S21	Cytoplasm	other
-1,214	RPS23		RPS23	ribosomal protein S23	Cytoplasm	translation regulator
-1,413	RPS24		RPS24	ribosomal protein S24	Cytoplasm	other
-1,500	RPS25		RPS25	ribosomal protein S25	Cytoplasm	other
-1,477	RPS27		RPS27	ribosomal protein S27	Cytoplasm	other
-1,397	RPS27A		RPS27A	ribosomal protein S27a	Cytoplasm	other
-1,253	RPS29		RPS29	ribosomal protein S29	Cytoplasm	other
-1,358	RPS3		RPS3	ribosomal protein S3	Cytoplasm	enzyme
-1,609	RPS3A		RPS3A	ribosomal protein S3A	Nucleus	other
-2,759	RPS3AP5		RPS3AP5	ribosomal protein S3A pseudogene 5	Other	other
-1,258	RPS4Y1		RPS4Y1	ribosomal protein S4, Y-linked 1	Cytoplasm	other
-1,262	RPS5		RPS5	ribosomal protein S5	Cytoplasm	other
-1,328	RPS6		RPS6	ribosomal protein S6	Cytoplasm	other
-1,350	RPS7		RPS7	ribosomal protein S7	Cytoplasm	other
-1,407	RPS8		RPS8	ribosomal protein S8	Cytoplasm	other
-1,312	RPS9		RPS9	ribosomal protein S9	Cytoplasm	translation regulator
1,480	RRAS		RRAS	related RAS viral (r-ras) oncogene homolog	Cytoplasm	enzyme
1,457	RRBP1		RRBP1	ribosome binding protein 1	Cytoplasm	other
-1,394	RSL1D1		RSL1D1	ribosomal L1 domain containing 1	Nucleus	other
-1,807	RSL24D1		RSL24D1	ribosomal L24 domain containing 1	Nucleus	other
-1,370	RUVBL1		RUVBL1	RuvB-like AAA ATPase 1	Nucleus	transcription regulator
1,283	S100A11		S100A11	S100 calcium binding protein A11	Cytoplasm	other
-1,846	SARNP		SARNP	SAP domain containing ribonucleoprotein	Nucleus	other
1,218	SAT1		SAT1	spermidine/spermine N1-acetyltransferase 1	Cytoplasm	enzyme
-1,353	SCAMP1		SCAMP1	secretory carrier membrane protein 1	Cytoplasm	transporter
-1,502	SCP2		SCP2	sterol carrier protein 2	Cytoplasm	transporter
2,077	SDC2		SDC2	syndecan 2	Plasma Membrane	other
-1,483	SEC11C		SEC11C	SEC11 homolog C (S. cerevisiae)	Cytoplasm	peptidase
-1,230	SEC61B		SEC61B	Sec61 beta subunit	Cytoplasm	transporter
2,210	SEMA3C		SEMA3C	sema domain, immunoglobulin domain (Ig), short basic domain, secreted, (semaphorin) 3C	Extracellular Space	other
2,009	SEMA6A		SEMA6A	sema domain, transmembrane domain (TM), and cytoplasmic domain, (semaphorin) 6A	Plasma Membrane	transmembrane receptor
7,134	SEMG2		SEMG2	semenogelin II	Extracellular Space	other
-2,226	SENP3-EIF4A1		SENP3-EIF4A1	SENP3-EIF4A1 readthrough (NMD candidate)	Other	other
1,444	SEPHS2		SEPHS2	selenophosphate synthetase 2	Other	enzyme
-1,373	SERBP1		SERBP1	SERPINE1 mRNA binding protein 1	Cytoplasm	other
2,542	SERF1A		SERF1A/SERF1B	small EDRK-rich factor 1A (telomeric)	Other	other
2,159	SERINC2		SERINC2	serine incorporator 2	Plasma Membrane	transporter
2,467	SERPINI1		SERPINI1	serpin peptidase inhibitor, clade I (neuroserpin), member 1	Extracellular Space	other
-2,608	SESN3		SESN3	sestrin 3	Extracellular Space	other
-1,218	SET		SET	SET nuclear proto-oncogene	Nucleus	phosphatase
1,975	SETD7		SETD7	SET domain containing (lysine methyltransferase) 7	Nucleus	enzyme
-1,393	SFXN4		SFXN4	sideroflexin 4	Cytoplasm	transporter
2,000	SH3BGRL		SH3BGRL	SH3 domain binding glutamate-rich protein like	Cytoplasm	other
-1,842	SHC1		SHC1	SHC (Src homology 2 domain containing) transforming protein 1	Cytoplasm	kinase
-1,236	SHMT2		SHMT2	serine hydroxymethyltransferase 2 (mitochondrial)	Cytoplasm	enzyme
1,977	SHROOM1		SHROOM1	shroom family member 1	Other	other
-1,307	SLBP		SLBP	stem-loop binding protein	Nucleus	other
-1,380	SLC16A1		SLC16A1	solute carrier family 16 (monocarboxylate transporter), member 1	Plasma Membrane	transporter
-1,418	SLC19A2		SLC19A2	solute carrier family 19 (thiamine transporter), member 2	Plasma Membrane	transporter
1,453	SLC22A23		SLC22A23	solute carrier family 22, member 23	Other	transporter
1,645	SLC25A16		SLC25A16	solute carrier family 25 (mitochondrial carrier), member 16	Cytoplasm	transporter
1,388	SLC25A17		SLC25A17	solute carrier family 25 (mitochondrial carrier; peroxisomal membrane protein, 34kDa), member 17	Cytoplasm	transporter
-1,258	SLC25A33		SLC25A33	solute carrier family 25 (pyrimidine nucleotide carrier), member 33	Cytoplasm	transporter
-1,254	SLC25A5		SLC25A5	solute carrier family 25 (mitochondrial carrier; adenine nucleotide translocator), member 5	Cytoplasm	transporter	clodronic acid
-1,167	SLC25A6		SLC25A6	solute carrier family 25 (mitochondrial carrier; adenine nucleotide translocator), member 6	Cytoplasm	transporter	clodronic acid
-1,644	SLC35F5		SLC35F5	solute carrier family 35, member F5	Other	other
-1,404	SLC38A1		SLC38A1	solute carrier family 38, member 1	Plasma Membrane	transporter
-1,409	SLC38A2		SLC38A2	solute carrier family 38, member 2	Plasma Membrane	transporter
-1,581	SLC39A10		SLC39A10	solute carrier family 39 (zinc transporter), member 10	Extracellular Space	transporter
-1,874	SLC43A1		SLC43A1	solute carrier family 43 (amino acid system L transporter), member 1	Plasma Membrane	transporter
1,360	SLC44A2		SLC44A2	solute carrier family 44 (choline transporter), member 2	Extracellular Space	transporter
1,703	SLC4A4		SLC4A4	solute carrier family 4 (sodium bicarbonate cotransporter), member 4	Plasma Membrane	transporter
2,235	SLC7A8		SLC7A8	solute carrier family 7 (amino acid transporter light chain, L system), member 8	Plasma Membrane	transporter
3,512	SLPI		SLPI	secretory leukocyte peptidase inhibitor	Cytoplasm	other
-1,625	SMIM13		SMIM13	small integral membrane protein 13	Other	other
1,500	SMPDL3A		SMPDL3A	sphingomyelin phosphodiesterase, acid-like 3A	Extracellular Space	enzyme
-1,560	SNHG1		SNHG1	small nucleolar RNA host gene 1 (non-protein coding)	Other	other
-1,882	SNHG16		SNHG16	small nucleolar RNA host gene 16 (non-protein coding)	Other	other
-1,269	SNHG8		SNHG8	small nucleolar RNA host gene 8 (non-protein coding)	Other	other
-1,417	SNHG9		SNHG9	small nucleolar RNA host gene 9 (non-protein coding)	Other	other
-1,371	SNRPB		SNRPB	small nuclear ribonucleoprotein polypeptides B and B1	Nucleus	other
-1,439	SNRPC		SNRPC	small nuclear ribonucleoprotein polypeptide C	Nucleus	other
-1,538	SNRPD2		SNRPD2	small nuclear ribonucleoprotein D2 polypeptide 16.5kDa	Nucleus	other
-1,261	SNRPD3		SNRPD3	small nuclear ribonucleoprotein D3 polypeptide 18kDa	Nucleus	other
-1,392	SNRPE		SNRPE	small nuclear ribonucleoprotein polypeptide E	Nucleus	other
1,191	SNRPN		SNRPN	small nuclear ribonucleoprotein polypeptide N	Nucleus	other
-1,387	SOX4		SOX4	SRY (sex determining region Y)-box 4	Nucleus	transcription regulator
-1,387	SOX4		SOX4	SRY (sex determining region Y)-box 4	Nucleus	transcription regulator
1,451	SPATA20		SPATA20	spermatogenesis associated 20	Other	other
1,257	SPDEF		SPDEF	SAM pointed domain containing ETS transcription factor	Nucleus	transcription regulator
1,297	SPINT1		SPINT1	serine peptidase inhibitor, Kunitz type 1	Extracellular Space	other
1,109	SPON2		SPON2	spondin 2, extracellular matrix protein	Extracellular Space	other
-2,319	SPRYD4		SPRYD4	SPRY domain containing 4	Cytoplasm	other
1,487	SPTAN1		SPTAN1	spectrin, alpha, non-erythrocytic 1	Plasma Membrane	other
1,554	SPTBN2		SPTBN2	spectrin, beta, non-erythrocytic 2	Cytoplasm	other
3,110	SPTSSA		SPTSSA	serine palmitoyltransferase, small subunit A	Cytoplasm	other
-1,151	SRP14		SRP14	signal recognition particle 14kDa (homologous Alu RNA binding protein)	Cytoplasm	other
-1,276	SRP72		SRP72	signal recognition particle 72kDa	Nucleus	kinase
-1,243	SRP9		SRP9	signal recognition particle 9kDa	Cytoplasm	other
-1,248	SRSF3		SRSF3	serine/arginine-rich splicing factor 3	Nucleus	other
-1,504	SSR1		SSR1	signal sequence receptor, alpha	Cytoplasm	other
-1,369	SSR2		SSR2	signal sequence receptor, beta (translocon-associated protein beta)	Cytoplasm	other
-1,186	ST13		ST13	suppression of tumorigenicity 13 (colon carcinoma) (Hsp70 interacting protein)	Cytoplasm	other
-1,929	ST6GALNAC6		ST6GALNAC6	ST6 (alpha-N-acetyl-neuraminyl-2,3-beta-galactosyl-1,3)-N-acetylgalactosaminide alpha-2,6-sialyltransferase 6	Cytoplasm	enzyme
1,276	STEAP1		STEAP1	six transmembrane epithelial antigen of the prostate 1	Plasma Membrane	transporter
1,235	STEAP2		STEAP2	STEAP family member 2, metalloreductase	Plasma Membrane	transporter
-1,293	STIP1		STIP1	stress-induced phosphoprotein 1	Cytoplasm	other
-1,431	STMN1		STMN1	stathmin 1	Cytoplasm	other
-1,304	STOML2		STOML2	stomatin (EPB72)-like 2	Plasma Membrane	other
1,538	STX12		STX12	syntaxin 12	Cytoplasm	other
-1,688	SUCLG1		SUCLG1	succinate-CoA ligase, alpha subunit	Cytoplasm	enzyme
1,377	SUMF2		SUMF2	sulfatase modifying factor 2	Cytoplasm	other
1,326	SVIP		SVIP	small VCP/p97-interacting protein	Cytoplasm	other
-1,390	SYNCRIP		SYNCRIP	synaptotagmin binding, cytoplasmic RNA interacting protein	Nucleus	other
2,198	SYT4		SYT4	synaptotagmin IV	Cytoplasm	transporter
1,669	SYT7		SYT7	synaptotagmin VII	Cytoplasm	transporter
1,437	TACC1		TACC1	transforming, acidic coiled-coil containing protein 1	Nucleus	other
1,312	TAX1BP1		TAX1BP1	Tax1 (human T-cell leukemia virus type I) binding protein 1	Cytoplasm	other
1,655	TBC1D9		TBC1D9	TBC1 domain family, member 9 (with GRAM domain)	Plasma Membrane	other
1,638	TBC1D9B		TBC1D9B	TBC1 domain family, member 9B (with GRAM domain)	Other	other
-1,331	TBCA		TBCA	tubulin folding cofactor A	Cytoplasm	other
1,336	FAM115A		TCAF1	TRPM8 channel-associated factor 1	Plasma Membrane	other
-5,750	TCEB1P2		TCEB1P2	transcription elongation factor B (SIII), polypeptide 1 pseudogene 2	Other	other
-1,334	TCP1		TCP1	t-complex 1	Cytoplasm	other
-1,394	TDG		TDG	thymine-DNA glycosylase	Nucleus	enzyme
-1,433	TFAM		TFAM	transcription factor A, mitochondrial	Cytoplasm	transcription regulator
-1,784	TGIF2-C20orf24		TGIF2-C20orf24	TGIF2-C20orf24 readthrough	Other	other
2,455	THBS1		THBS1	thrombospondin 1	Extracellular Space	other
1,678	THOP1		THOP1	thimet oligopeptidase 1	Cytoplasm	peptidase
2,060	THRB		THRB	thyroid hormone receptor, beta	Nucleus	ligand-dependent nuclear receptor	3,5-diiodothyropropionic acid, denosumab/levothyroxine, amiodarone, levothyroxine, dextrothyroxine, L-triiodothyronine
-1,376	TIMM10		TIMM10	translocase of inner mitochondrial membrane 10 homolog (yeast)	Cytoplasm	transporter
-1,459	TIMM17A		TIMM17A	translocase of inner mitochondrial membrane 17 homolog A (yeast)	Cytoplasm	transporter
-1,366	TK1		TK1	thymidine kinase 1, soluble	Cytoplasm	kinase
1,634	TM4SF1		TM4SF1	transmembrane 4 L six family member 1	Plasma Membrane	other
-1,540	TMA7		TMA7	translation machinery associated 7 homolog (S. cerevisiae)	Other	other
1,648	TMCO3		TMCO3	transmembrane and coiled-coil domains 3	Other	transporter
2,694	TMED7		TMED7	transmembrane emp24 protein transport domain containing 7	Cytoplasm	transporter
-2,571	TMED7-TICAM2		TMED7-TICAM2	TMED7-TICAM2 readthrough	Other	other
-1,360	TMED9		TMED9	transmembrane emp24 protein transport domain containing 9	Cytoplasm	transporter
4,119	TMEFF2		TMEFF2	transmembrane protein with EGF-like and two follistatin-like domains 2	Cytoplasm	other
-1,325	TMEM123		TMEM123	transmembrane protein 123	Plasma Membrane	other
1,193	TMEM141		TMEM141	transmembrane protein 141	Other	other
1,872	TMEM184B		TMEM184B	transmembrane protein 184B	Other	other
-1,427	TMEM184C		TMEM184C	transmembrane protein 184C	Other	other
1,548	TMEM54		TMEM54	transmembrane protein 54	Other	other
-1,531	TMEM69		TMEM69	transmembrane protein 69	Other	other
2,784	TMEM79		TMEM79	transmembrane protein 79	Cytoplasm	other
1,844	TMEM8A		TMEM8A	transmembrane protein 8A	Plasma Membrane	other
3,172	TMPRSS11E		TMPRSS11E	transmembrane protease, serine 11E	Extracellular Space	peptidase
1,200	TMSB10	D	TMSB10/TMSB4X	thymosin beta 10	Cytoplasm	other
1,321	TMSB4X	D	TMSB10/TMSB4X	thymosin beta 10	Cytoplasm	other
-1,583	TMSB15A		TMSB15A	thymosin beta 15a	Cytoplasm	other
1,349	TNFRSF19		TNFRSF19	tumor necrosis factor receptor superfamily, member 19	Plasma Membrane	transmembrane receptor
-4,952	TNFSF12-TNFSF13		TNFSF12-TNFSF13	TNFSF12-TNFSF13 readthrough	Other	other
1,769	TNKS1BP1		TNKS1BP1	tankyrase 1 binding protein 1, 182kDa	Nucleus	other
1,462	TOM1L2		TOM1L2	target of myb1-like 2 (chicken)	Cytoplasm	transporter
-1,623	TOMM20		TOMM20	translocase of outer mitochondrial membrane 20 homolog (yeast)	Cytoplasm	transporter
1,308	TOMM22		TOMM22	translocase of outer mitochondrial membrane 22 homolog (yeast)	Cytoplasm	transporter
-3,187	TOMM5		TOMM5	translocase of outer mitochondrial membrane 5 homolog (yeast)	Cytoplasm	other
-1,252	TOMM7		TOMM7	translocase of outer mitochondrial membrane 7 homolog (yeast)	Cytoplasm	transporter
-1,388	TOP2A		TOP2A	topoisomerase (DNA) II alpha 170kDa	Nucleus	enzyme	novobiocin, etoposide, teniposide, CPI-0004Na, becatecarin, elsamitrucin, AQ4N, elomotecan, tafluposide, fleroxacin, cyclophosphamide/epirubicin/5-fluorouracil, cytarabine/daunorubicin, hydrocortisone/mitoxantrone, mitoxantrone/prednisone, cladribine/cytarabine/daunorubicin, cytarabine/daunorubicin/tretinoin, cytarabine/idarubicin, idarubicin/mitoxantrone/tretinoin, arsenic trioxide/daunorubicin/…
-2,247	TP53INP1		TP53INP1	tumor protein p53 inducible nuclear protein 1	Nucleus	other
-1,101	TPI1		TPI1	triosephosphate isomerase 1	Cytoplasm	enzyme
1,544	TPM4		TPM4	tropomyosin 4	Cytoplasm	other
-1,506	TPT1		TPT1	tumor protein, translationally-controlled 1	Cytoplasm	other
-1,511	TRAP1		TRAP1	TNF receptor-associated protein 1	Cytoplasm	enzyme
1,287	TRAPPC1		TRAPPC1	trafficking protein particle complex 1	Cytoplasm	other
1,509	TRAPPC5		TRAPPC5	trafficking protein particle complex 5	Cytoplasm	other
3,223	TRGC1		TRGC1	T cell receptor gamma constant 1	Other	other
2,633	TRGC2		TRGC2	T cell receptor gamma constant 2	Other	other
2,340	TRGJP		TRGJP	T cell receptor gamma joining P	Other	other
-1,650	TRIAP1		TRIAP1	TP53 regulated inhibitor of apoptosis 1	Cytoplasm	other
1,575	TRIM49D1P	D	TRIM49D1/TRIM49D2P	tripartite motif containing 49D2, pseudogene	Other	other
3,397	TRIM49D2P	D	TRIM49D1/TRIM49D2P	tripartite motif containing 49D2, pseudogene	Other	other
1,534	TRIM68		TRIM68	tripartite motif containing 68	Cytoplasm	enzyme
-1,337	TRMT10C		TRMT10C	tRNA methyltransferase 10 homolog C (S. cerevisiae)	Cytoplasm	other
-1,444	TRMT112		TRMT112	tRNA methyltransferase 11-2 homolog (S. cerevisiae)	Cytoplasm	enzyme
-1,330	TRUB1		TRUB1	TruB pseudouridine (psi) synthase family member 1	Other	enzyme
-1,492	TRUB2		TRUB2	TruB pseudouridine (psi) synthase family member 2	Cytoplasm	enzyme
1,594	TSC22D1		TSC22D1	TSC22 domain family, member 1	Nucleus	transcription regulator
1,744	TSPAN1		TSPAN1	tetraspanin 1	Cytoplasm	transporter
2,920	TTR		TTR	transthyretin	Extracellular Space	transporter
1,145	TUBA1A		TUBA1A	tubulin, alpha 1a	Cytoplasm	other	epothilone B, colchicine/probenecid, larotaxel, eribulin, davunetide, vintafolide, milataxel, cevipabulin, gemcitabine/paclitaxel, docetaxel/prednisone, capecitabine/docetaxel, paclitaxel/trastuzumab, cyclophosphamide/prednisone/vincristine, docetaxel/hydrocortisone, cyclophosphamide/docetaxel, gemcitabine/vinorelbine, cyclophosphamide/daunorubicin/imatinib/prednisone/vincristine, cyclophosphamid…
-1,301	TUBA1B		TUBA1B	tubulin, alpha 1b	Cytoplasm	other
-1,212	TUFM		TUFM	Tu translation elongation factor, mitochondrial	Cytoplasm	translation regulator
1,633	TUFT1		TUFT1	tuftelin 1	Cytoplasm	other
2,279	TWIST1		TWIST1	twist family bHLH transcription factor 1	Nucleus	transcription regulator
-1,512	TXN		TXN	thioredoxin	Cytoplasm	enzyme
-1,512	TXN		TXN	thioredoxin	Cytoplasm	enzyme
-1,355	TXN2		TXN2	thioredoxin 2	Cytoplasm	enzyme
-1,618	TXNDC5		TXNDC5	thioredoxin domain containing 5 (endoplasmic reticulum)	Cytoplasm	enzyme
-1,661	TXNIP		TXNIP	thioredoxin interacting protein	Cytoplasm	other
-1,268	TXNRD1		TXNRD1	thioredoxin reductase 1	Cytoplasm	enzyme	arsenic trioxide/tretinoin, arsenic trioxide/daunorubicin/tretinoin, arsenic trioxide/gemtuzumab ozogamicin/tretinoin, arsenic trioxide/idarubicin/tretinoin, arsenic trioxide
-1,356	UAP1		UAP1	UDP-N-acetylglucosamine pyrophosphorylase 1	Nucleus	enzyme
-1,191	UBB		UBB	ubiquitin B	Cytoplasm	enzyme
-1,336	UBE2K		UBE2K	ubiquitin-conjugating enzyme E2K	Cytoplasm	transcription regulator
-1,265	UBE2T		UBE2T	ubiquitin-conjugating enzyme E2T	Nucleus	enzyme
-1,841	UBE2V1		UBE2V1	ubiquitin-conjugating enzyme E2 variant 1	Nucleus	transcription regulator
-1,360	UBQLN1		UBQLN1	ubiquilin 1	Cytoplasm	other
-2,087	UGCG		UGCG	UDP-glucose ceramide glucosyltransferase	Cytoplasm	enzyme	eliglustat, N-butyldeoxygalactonojirimycin, N-butyldeoxynojirimycin
1,235	UGT2B15		UGT2B15	UDP glucuronosyltransferase 2 family, polypeptide B15	Cytoplasm	enzyme
1,558	UGT2B17		UGT2B17	UDP glucuronosyltransferase 2 family, polypeptide B17	Cytoplasm	enzyme
2,472	UGT2B28		UGT2B28	UDP glucuronosyltransferase 2 family, polypeptide B28	Cytoplasm	enzyme
-1,575	UHMK1		UHMK1	U2AF homology motif (UHM) kinase 1	Nucleus	kinase
-2,351	ULBP2		ULBP2	UL16 binding protein 2	Plasma Membrane	transmembrane receptor
1,540	UNC13B		UNC13B	unc-13 homolog B (C. elegans)	Cytoplasm	other
-1,277	UQCRFS1		UQCRFS1	ubiquinol-cytochrome c reductase, Rieske iron-sulfur polypeptide 1	Cytoplasm	enzyme
-1,462	UQCRH		UQCRH	ubiquinol-cytochrome c reductase hinge protein	Cytoplasm	enzyme
1,329	USP54		USP54	ubiquitin specific peptidase 54	Other	peptidase
1,337	UTRN		UTRN	utrophin	Plasma Membrane	transmembrane receptor
-1,356	UXT		UXT	ubiquitously-expressed, prefoldin-like chaperone	Cytoplasm	other
-1,677	VAMP3		VAMP3	vesicle-associated membrane protein 3	Plasma Membrane	other
1,892	VANGL1		VANGL1	VANGL planar cell polarity protein 1	Cytoplasm	other
1,541	VAT1		VAT1	vesicle amine transport 1	Plasma Membrane	transporter
-1,234	VDAC1		VDAC1	voltage-dependent anion channel 1	Cytoplasm	ion channel
-1,250	VDAC2		VDAC2	voltage-dependent anion channel 2	Cytoplasm	ion channel
-1,402	VEGFA		VEGFA	vascular endothelial growth factor A	Extracellular Space	growth factor	dalteparin, bevacizumab, ranibizumab, aflibercept, bevacizumab/erlotinib, bevacizumab/sorafenib, bevacizumab/5-fluorouracil, bevacizumab/temozolomide, bevacizumab/irinotecan, bevacizumab/carmustine/lomustine, bevacizumab/paclitaxel, bevacizumab/irinotecan/oxaliplatin, aflibercept/irinotecan, bevacizumab/capecitabine/oxaliplatin, bevacizumab/panitumumab, bevacizumab/cetuximab, bevacizumab/pemetrex…
2,231	VIM		VIM	vimentin	Cytoplasm	other
1,553	VOPP1		VOPP1	vesicular, overexpressed in cancer, prosurvival protein 1	Nucleus	other
1,442	VPS13A		VPS13A	vacuolar protein sorting 13 homolog A (S. cerevisiae)	Cytoplasm	transporter
-2,074	WDR45B		WDR45B	WD repeat domain 45B	Other	other
-1,264	WSB2		WSB2	WD repeat and SOCS box containing 2	Other	other
-1,234	XRCC5		XRCC5	X-ray repair complementing defective repair in Chinese hamster cells 5 (double-strand-break rejoining)	Nucleus	enzyme
-1,276	XRCC6		XRCC6	X-ray repair complementing defective repair in Chinese hamster cells 6	Nucleus	enzyme
-1,277	XRN2		XRN2	5'-3' exoribonuclease 2	Nucleus	enzyme
-1,476	YRDC		YRDC	yrdC N(6)-threonylcarbamoyltransferase domain containing	Other	other
-1,139	YWHAE		YWHAE	tyrosine 3-monooxygenase/tryptophan 5-monooxygenase activation protein, epsilon	Cytoplasm	other
-1,406	ZCCHC17		ZCCHC17	zinc finger, CCHC domain containing 17	Nucleus	other
2,139	ZCCHC24		ZCCHC24	zinc finger, CCHC domain containing 24	Other	other
1,906	ZDHHC16		ZDHHC16	zinc finger, DHHC-type containing 16	Cytoplasm	enzyme
1,594	ZER1		ZER1	zyg-11 related, cell cycle regulator	Other	enzyme
-1,715	ZFAND6		ZFAND6	zinc finger, AN1-type domain 6	Other	other
-1,574	ZFAS1		ZFAS1	ZNFX1 antisense RNA 1	Other	other
-1,673	ZNF217		ZNF217	zinc finger protein 217	Nucleus	transcription regulator
1,660	ZNF358		ZNF358	zinc finger protein 358	Nucleus	other
2,988	ZPLD1		ZPLD1	zona pellucida-like domain containing 1	Other	other
2,846	ZW10		ZW10	zw10 kinetochore protein	Nucleus	other

## Sheet: SI_E _DLD1 si vs scr Nx
© 2000-2015 QIAGEN. All rights reserved.
Fold-change	ID	Notes	Symbol	Entrez Gene Name	Location	Type(s)	Drug(s)
1,314	AARS		AARS	alanyl-tRNA synthetase	Cytoplasm	enzyme
3,977	ABHD14A-ACY1		ABHD14A-ACY1	ABHD14A-ACY1 readthrough (NMD candidate)	Other	other
1,186	ACADVL		ACADVL	acyl-CoA dehydrogenase, very long chain	Cytoplasm	enzyme
-1,142	ACTR2		ACTR2	ARP2 actin-related protein 2 homolog (yeast)	Plasma Membrane	other
-2,931	ALPPL2		ALPPL2	alkaline phosphatase, placental-like 2	Plasma Membrane	phosphatase
1,835	ANKRD1		ANKRD1	ankyrin repeat domain 1 (cardiac muscle)	Cytoplasm	transcription regulator
-1,167	AREG		AREG	amphiregulin	Extracellular Space	growth factor
-1,147	ARF1		ARF1	ADP-ribosylation factor 1	Cytoplasm	enzyme
-1,244	ARF4		ARF4	ADP-ribosylation factor 4	Cytoplasm	enzyme
1,152	ARL6IP1		ARL6IP1	ADP-ribosylation factor-like 6 interacting protein 1	Cytoplasm	other
1,364	ASNS		ASNS	asparagine synthetase (glutamine-hydrolyzing)	Cytoplasm	enzyme
-1,171	ASS1		ASS1	argininosuccinate synthase 1	Cytoplasm	enzyme
1,186	ATF4		ATF4	activating transcription factor 4	Nucleus	transcription regulator
1,471	ATHL1		ATHL1	ATH1, acid trehalase-like 1 (yeast)	Other	other
1,336	AURKB		AURKB	aurora kinase B	Nucleus	kinase	barasertib, tozasertib, danusertib, GSK1070916
1,566	C17orf49		C17orf49	chromosome 17 open reading frame 49	Nucleus	other
-1,352	C18orf32		C18orf32	chromosome 18 open reading frame 32	Other	other
-1,155	C19orf33		C19orf33	chromosome 19 open reading frame 33	Nucleus	other
1,248	C19orf48		C19orf48	chromosome 19 open reading frame 48	Other	other
-1,504	CCL26		CCL26	chemokine (C-C motif) ligand 26	Extracellular Space	cytokine
1,209	CCNB1		CCNB1	cyclin B1	Cytoplasm	kinase
1,320	CCNB2		CCNB2	cyclin B2	Cytoplasm	other
-1,169	CCT4		CCT4	chaperonin containing TCP1, subunit 4 (delta)	Cytoplasm	other
-1,178	CCT6A		CCT6A	chaperonin containing TCP1, subunit 6A (zeta 1)	Cytoplasm	other
-2,503	CD68		CD68	CD68 molecule	Plasma Membrane	other
-1,116	CD9		CD9	CD9 molecule	Plasma Membrane	other
1,207	CD97		CD97	CD97 molecule	Plasma Membrane	G-protein coupled receptor
1,160	CDC20		CDC20	cell division cycle 20	Nucleus	other
1,356	CDCA8		CDCA8	cell division cycle associated 8	Nucleus	other
1,523	KIAA1199		CEMIP	cell migration inducing protein, hyaluronan binding	Cytoplasm	enzyme
1,480	CHAC1		CHAC1	ChaC glutathione-specific gamma-glutamylcyclotransferase 1	Cytoplasm	other
-1,110	CHCHD2		CHCHD2	coiled-coil-helix-coiled-coil-helix domain containing 2	Cytoplasm	other
-1,122	CLIC1		CLIC1	chloride intracellular channel 1	Nucleus	ion channel
-1,273	CMPK1		CMPK1	cytidine monophosphate (UMP-CMP) kinase 1, cytosolic	Nucleus	kinase
-1,182	CNIH		CNIH1	cornichon family AMPA receptor auxiliary protein 1	Plasma Membrane	other
-1,162	CPOX		CPOX	coproporphyrinogen oxidase	Cytoplasm	enzyme
1,193	CST7		CST7	cystatin F (leukocystatin)	Extracellular Space	other
-1,322	CXCL5		CXCL5	chemokine (C-X-C motif) ligand 5	Extracellular Space	cytokine
-1,223	CYCS		CYCS	cytochrome c, somatic	Cytoplasm	transporter
1,537	CYR61		CYR61	cysteine-rich, angiogenic inducer, 61	Extracellular Space	other
-1,283	DAD1		DAD1	defender against cell death 1	Cytoplasm	other
1,615	DDIT4		DDIT4	DNA-damage-inducible transcript 4	Cytoplasm	other
-1,856	DYNLT3		DYNLT3	dynein, light chain, Tctex-type 3	Cytoplasm	other
1,159	EEF1A1P5		EEF1A1P5	eukaryotic translation elongation factor 1 alpha 1 pseudogene 5	Other	other
1,097	EEF2		EEF2	eukaryotic translation elongation factor 2	Cytoplasm	translation regulator
1,384	EGR1		EGR1	early growth response 1	Nucleus	transcription regulator
-1,080	EPCAM		EPCAM	epithelial cell adhesion molecule	Plasma Membrane	other	tucotuzumab celmoleukin, catumaxomab, adecatumumab
1,182	ERRFI1		ERRFI1	ERBB receptor feedback inhibitor 1	Cytoplasm	other
1,324	FAM83D		FAM83D	family with sequence similarity 83, member D	Other	other
-1,350	FTH1		FTH1	ferritin, heavy polypeptide 1	Cytoplasm	enzyme
-1,226	FTL		FTL	ferritin, light polypeptide	Cytoplasm	enzyme
1,500	GANAB		GANAB	glucosidase, alpha; neutral AB	Cytoplasm	enzyme	miglitol
1,173	GARS		GARS	glycyl-tRNA synthetase	Cytoplasm	enzyme
-1,206	GDA		GDA	guanine deaminase	Cytoplasm	enzyme
-1,206	GLO1		GLO1	glyoxalase I	Cytoplasm	enzyme
-1,215	GNL3		GNL3	guanine nucleotide binding protein-like 3 (nucleolar)	Nucleus	other
1,337	HJURP		HJURP	Holliday junction recognition protein	Nucleus	other
-1,102	HMGA1		HMGA1	high mobility group AT-hook 1	Nucleus	transcription regulator
1,238	HMGB2		HMGB2	high mobility group box 2	Nucleus	transcription regulator
-1,255	HMGCS1		HMGCS1	3-hydroxy-3-methylglutaryl-CoA synthase 1 (soluble)	Cytoplasm	enzyme
-1,212	HSP90AA1		HSP90AA1	heat shock protein 90kDa alpha (cytosolic), class A member 1	Cytoplasm	enzyme	alvespimycin, retaspimycin, luminespib, cisplatin
-1,100	HSPA8		HSPA8	heat shock 70kDa protein 8	Cytoplasm	enzyme
-1,107	HSPD1		HSPD1	heat shock 60kDa protein 1 (chaperonin)	Cytoplasm	enzyme
-1,234	HSPH1		HSPH1	heat shock 105kDa/110kDa protein 1	Cytoplasm	other
1,140	IER3		IER3	immediate early response 3	Cytoplasm	other
-1,760	IFI30		IFI30	interferon, gamma-inducible protein 30	Cytoplasm	enzyme
-1,332	IL33		IL33	interleukin 33	Extracellular Space	cytokine
-1,268	ISG15		ISG15	ISG15 ubiquitin-like modifier	Extracellular Space	other
1,249	ITGA3		ITGA3	integrin, alpha 3 (antigen CD49C, alpha 3 subunit of VLA-3 receptor)	Plasma Membrane	other
1,253	ITGB4		ITGB4	integrin, beta 4	Plasma Membrane	transmembrane receptor
1,409	KIF20A		KIF20A	kinesin family member 20A	Cytoplasm	transporter
1,291	KIF2C		KIF2C	kinesin family member 2C	Nucleus	other
-1,160	KRT18		KRT18	keratin 18, type I	Cytoplasm	other
-1,086	KRT19		KRT19	keratin 19, type I	Cytoplasm	other
-1,122	KRT8		KRT8	keratin 8, type II	Cytoplasm	other
-1,243	LGALS3		LGALS3	lectin, galactoside-binding, soluble, 3	Extracellular Space	other
-1,270	MALL		MALL	mal, T-cell differentiation protein-like	Plasma Membrane	other
-5,862	MB		MB	myoglobin	Cytoplasm	transporter
1,188	MCM7		MCM7	minichromosome maintenance complex component 7	Nucleus	enzyme
-1,158	ME1		ME1	malic enzyme 1, NADP(+)-dependent, cytosolic	Cytoplasm	enzyme
-1,236	MRPS35		MRPS35	mitochondrial ribosomal protein S35	Cytoplasm	other
-1,176	MSMO1		MSMO1	methylsterol monooxygenase 1	Cytoplasm	enzyme
1,282	MT-ATP8		MT-ATP8	ATP synthase F0 subunit 8	Cytoplasm	enzyme
1,415	MT-CYB		MT-CYB	cytochrome b	Cytoplasm	enzyme	atovaquone, atovaquone/proguanil
1,393	MT-ND1		MT-ND1	NADH dehydrogenase, subunit 1 (complex I)	Cytoplasm	enzyme
1,523	MT-ND2		MT-ND2	MTND2	Cytoplasm	enzyme
1,039	MT-ND3		MT-ND3	NADH dehydrogenase, subunit 3 (complex I)	Cytoplasm	enzyme
1,325	MT-ND4		MT-ND4	NADH dehydrogenase, subunit 4 (complex I)	Cytoplasm	enzyme
1,317	MT-ND4L		MT-ND4L	NADH dehydrogenase, subunit 4L (complex I)	Cytoplasm	enzyme
1,468	MT-ND5		MT-ND5	NADH dehydrogenase, subunit 5 (complex I)	Cytoplasm	enzyme
1,405	MT-ND6		MT-ND6	NADH dehydrogenase, subunit 6 (complex I)	Cytoplasm	enzyme
1,429	MT1E		MT1E	metallothionein 1E	Other	other
1,290	MT2A		MT2A	metallothionein 2A	Cytoplasm	other
-1,089	MYL12B		MYL12B	myosin, light chain 12B, regulatory	Cytoplasm	other
1,333	NCAPD2		NCAPD2	non-SMC condensin I complex, subunit D2	Nucleus	other
1,951	NEAT1		NEAT1	nuclear paraspeckle assembly transcript 1 (non-protein coding)	Other	other
-1,165	NOP10		NOP10	NOP10 ribonucleoprotein	Nucleus	other
-1,108	NPM1		NPM1	nucleophosmin (nucleolar phosphoprotein B23, numatrin)	Nucleus	transcription regulator
-1,164	NQO1		NQO1	NAD(P)H dehydrogenase, quinone 1	Cytoplasm	enzyme
-1,105	OAZ1		OAZ1	ornithine decarboxylase antizyme 1	Cytoplasm	enzyme
1,786	PCK2		PCK2	phosphoenolpyruvate carboxykinase 2 (mitochondrial)	Cytoplasm	kinase
1,786	PCK2		PCK2	phosphoenolpyruvate carboxykinase 2 (mitochondrial)	Cytoplasm	kinase
-1,052	PERP		PERP	PERP, TP53 apoptosis effector	Plasma Membrane	other
-1,115	PGAM1		PGAM1	phosphoglycerate mutase 1 (brain)	Cytoplasm	phosphatase
1,313	PHGDH		PHGDH	phosphoglycerate dehydrogenase	Cytoplasm	enzyme
-1,197	POMP		POMP	proteasome maturation protein	Nucleus	other
-1,164	PPA1		PPA1	pyrophosphatase (inorganic) 1	Cytoplasm	enzyme
-1,126	PRDX1		PRDX1	peroxiredoxin 1	Cytoplasm	enzyme
-1,089	PRDX5		PRDX5	peroxiredoxin 5	Cytoplasm	enzyme	auranofin
1,226	PRKCSH		PRKCSH	protein kinase C substrate 80K-H	Cytoplasm	enzyme
1,329	PSAT1		PSAT1	phosphoserine aminotransferase 1	Cytoplasm	enzyme
-1,139	PTGES3		PTGES3	prostaglandin E synthase 3 (cytosolic)	Cytoplasm	enzyme
1,299	QPRT		QPRT	quinolinate phosphoribosyltransferase	Cytoplasm	enzyme	atorvastatin/niacin, nicotinic acid/pioglitazone, nicotinic acid, lovastatin/niacin
3,478	RAB4B-EGLN2		RAB4B-EGLN2	RAB4B-EGLN2 readthrough (NMD candidate)	Other	other
-6,355	RPL12P4		RPL12P4	ribosomal protein L12 pseudogene 4	Other	other
-2,360	RPL15P3		RPL15P3	ribosomal protein L15 pseudogene 3	Other	other
-1,211	RPL24		RPL24	ribosomal protein L24	Cytoplasm	other
-1,084	RPL27		RPL27	ribosomal protein L27	Cytoplasm	other
-1,096	RPL29		RPL29	ribosomal protein L29	Cytoplasm	other
1,515	RPL39P5		RPL39P5	ribosomal protein L39 pseudogene 5	Other	other
1,077	RPLP1		RPLP1	ribosomal protein, large, P1	Cytoplasm	other
1,060	RPS12		RPS12	ribosomal protein S12	Cytoplasm	other
-1,113	RPS25		RPS25	ribosomal protein S25	Cytoplasm	other
-1,132	RPS27		RPS27	ribosomal protein S27	Cytoplasm	other
-1,214	RPS3AP5		RPS3AP5	ribosomal protein S3A pseudogene 5	Other	other
-1,204	S100A10		S100A10	S100 calcium binding protein A10	Cytoplasm	other
-1,170	S100A16		S100A16	S100 calcium binding protein A16	Nucleus	other
-1,135	S100P		S100P	S100 calcium binding protein P	Cytoplasm	other
-1,144	SCD		SCD	stearoyl-CoA desaturase (delta-9-desaturase)	Cytoplasm	enzyme
-1,413	SERPINB5		SERPINB5	serpin peptidase inhibitor, clade B (ovalbumin), member 5	Extracellular Space	other
1,620	SESN2		SESN2	sestrin 2	Cytoplasm	other
-6,809	SHFM1P1		SHFM1P1	split hand/foot malformation (ectrodactyly) type 1 pseudogene 1	Other	other
1,358	SLC1A4		SLC1A4	solute carrier family 1 (glutamate/neutral amino acid transporter), member 4	Plasma Membrane	transporter	riluzole
1,228	SLC1A5		SLC1A5	solute carrier family 1 (neutral amino acid transporter), member 5	Plasma Membrane	transporter
1,218	SLC3A2		SLC3A2	solute carrier family 3 (amino acid transporter heavy chain), member 2	Plasma Membrane	transporter
1,266	SLC7A5		SLC7A5	solute carrier family 7 (amino acid transporter light chain, L system), member 5	Plasma Membrane	transporter
-1,191	TCP1		TCP1	t-complex 1	Cytoplasm	other
-1,417	TFRC		TFRC	transferrin receptor	Plasma Membrane	transporter
1,168	TK1		TK1	thymidine kinase 1, soluble	Cytoplasm	kinase
-1,339	TMA7		TMA7	translation machinery associated 7 homolog (S. cerevisiae)	Other	other
3,235	TMED7		TMED7	transmembrane emp24 protein transport domain containing 7	Cytoplasm	transporter
-1,248	TMEM14A		TMEM14A	transmembrane protein 14A	Other	other
-1,059	TMSB10		TMSB10/TMSB4X	thymosin beta 10	Cytoplasm	other
1,315	TOP2A		TOP2A	topoisomerase (DNA) II alpha 170kDa	Nucleus	enzyme	novobiocin, etoposide, teniposide, CPI-0004Na, becatecarin, elsamitrucin, AQ4N, elomotecan, tafluposide, fleroxacin, cyclophosphamide/epirubicin/5-fluorouracil, cytarabine/daunorubicin, hydrocortisone/mitoxantrone, mitoxantrone/prednisone, cladribine/cytarabine/daunorubicin, cytarabine/daunorubicin/tretinoin, cytarabine/idarubicin, idarubicin/mitoxantrone/tretinoin, arsenic trioxide/daunorubicin/…
1,278	TPM4		TPM4	tropomyosin 4	Cytoplasm	other
1,276	TPX2		TPX2	TPX2, microtubule-associated	Nucleus	other
1,269	TRIB3		TRIB3	tribbles pseudokinase 3	Nucleus	kinase
1,087	TUBA1B		TUBA1B	tubulin, alpha 1b	Cytoplasm	other
1,192	TUBA1C		TUBA1C	tubulin, alpha 1c	Cytoplasm	other	epothilone B, colchicine/probenecid, larotaxel, eribulin, davunetide, vintafolide, milataxel, cevipabulin, gemcitabine/paclitaxel, docetaxel/prednisone, capecitabine/docetaxel, paclitaxel/trastuzumab, cyclophosphamide/prednisone/vincristine, docetaxel/hydrocortisone, cyclophosphamide/docetaxel, gemcitabine/vinorelbine, cyclophosphamide/daunorubicin/imatinib/prednisone/vincristine, cyclophosphamid…
1,169	TUBB		TUBB	tubulin, beta class I	Cytoplasm	other	ixabepilone, colchicine/probenecid, brentuximab vedotin, cabazitaxel, 6-mercaptopurine/methotrexate/prednisone/vincristine, dexamethasone/doxorubicin/vincristine, gemcitabine/vinorelbine, irinotecan/vincristine, trastuzumab/vinorelbine, methotrexate/vinorelbine, dasatinib/dexamethasone/vincristine, vinorelbine, vincristine, podophyllotoxin, colchicine
1,135	TUBB4B		TUBB4B	tubulin, beta 4B class IVb	Cytoplasm	other	epothilone B, colchicine/probenecid, larotaxel, ABT-751, eribulin, simotaxel, davunetide, vintafolide, milataxel, cevipabulin, brentuximab vedotin, cabazitaxel, gemcitabine/paclitaxel, docetaxel/prednisone, capecitabine/docetaxel, paclitaxel/trastuzumab, cyclophosphamide/prednisone/vincristine, docetaxel/hydrocortisone, cyclophosphamide/docetaxel, gemcitabine/vinorelbine, cyclophosphamide/daunoru…
-1,213	TXN		TXN	thioredoxin	Cytoplasm	enzyme
1,331	TXNIP		TXNIP	thioredoxin interacting protein	Cytoplasm	other
1,226	UBC		UBC	ubiquitin C	Cytoplasm	enzyme
1,204	UBE2S		UBE2S	ubiquitin-conjugating enzyme E2S	Nucleus	enzyme
-1,606	UCA1		UCA1	urothelial cancer associated 1 (non-protein coding)	Other	other
-1,260	UGDH		UGDH	UDP-glucose 6-dehydrogenase	Nucleus	enzyme
-4,046	UGT1A1		UGT1A1	UDP glucuronosyltransferase 1 family, polypeptide A1	Cytoplasm	enzyme
-1,118	VDAC1		VDAC1	voltage-dependent anion channel 1	Cytoplasm	ion channel
-1,233	WSB2		WSB2	WD repeat and SOCS box containing 2	Other	other

## Sheet: SI_F _DLD1 si vs scr Hx
© 2000-2015 QIAGEN. All rights reserved.
Fold-change	ID	Notes	Symbol	Entrez Gene Name	Location	Type(s)	Drug(s)
-1,102	ACTB		ACTB	actin, beta	Cytoplasm	other
-1,279	ACTG1		ACTG1	actin gamma 1	Cytoplasm	other
1,178	ACTR2		ACTR2	ARP2 actin-related protein 2 homolog (yeast)	Plasma Membrane	other
1,324	ADAM10		ADAM10	ADAM metallopeptidase domain 10	Plasma Membrane	peptidase
1,384	ADD3		ADD3	adducin 3 (gamma)	Cytoplasm	other
1,243	AGR2		AGR2	anterior gradient 2	Extracellular Space	other
1,277	AHNAK		AHNAK	AHNAK nucleoprotein	Nucleus	other
-1,207	ALDOA		ALDOA	aldolase A, fructose-bisphosphate	Cytoplasm	enzyme
-1,406	ALKBH5		ALKBH5	AlkB family member 5, RNA demethylase	Nucleus	enzyme
-1,512	ALYREF		ALYREF	Aly/REF export factor	Nucleus	transcription regulator
1,378	AMOTL2		AMOTL2	angiomotin like 2	Plasma Membrane	other
2,084	ANLN		ANLN	anillin, actin binding protein	Cytoplasm	other
1,202	ANP32B		ANP32B	acidic (leucine-rich) nuclear phosphoprotein 32 family, member B	Nucleus	other
1,270	ANXA1		ANXA1	annexin A1	Plasma Membrane	enzyme	hydrocortisone, hydrocortisone/prednisone, hydrocortisone/mitoxantrone
1,172	ANXA3		ANXA3	annexin A3	Cytoplasm	enzyme
-1,136	AP1S1		AP1S1	adaptor-related protein complex 1, sigma 1 subunit	Cytoplasm	transporter
1,407	APOBEC3B		APOBEC3B	apolipoprotein B mRNA editing enzyme, catalytic polypeptide-like 3B	Cytoplasm	enzyme
1,222	ARCN1		ARCN1	archain 1	Cytoplasm	other
1,324	AREG		AREG	amphiregulin	Extracellular Space	growth factor
-1,189	ARF1		ARF1	ADP-ribosylation factor 1	Cytoplasm	enzyme
1,838	ARHGAP11A		ARHGAP11A	Rho GTPase activating protein 11A	Cytoplasm	other
-1,289	ARHGDIA		ARHGDIA	Rho GDP dissociation inhibitor (GDI) alpha	Cytoplasm	other
1,373	ARL4C		ARL4C	ADP-ribosylation factor-like 4C	Nucleus	enzyme
1,442	ARL6IP1		ARL6IP1	ADP-ribosylation factor-like 6 interacting protein 1	Cytoplasm	other
-1,249	ARPC1A		ARPC1A	actin related protein 2/3 complex, subunit 1A, 41kDa	Extracellular Space	other
3,011	ASCL2		ASCL2	achaete-scute family bHLH transcription factor 2	Nucleus	transcription regulator
2,472	ASF1B		ASF1B	anti-silencing function 1B histone chaperone	Nucleus	other
-1,418	ASNA1		ASNA1	arsA arsenite transporter, ATP-binding, homolog 1 (bacterial)	Nucleus	transporter
1,635	ATAD2		ATAD2	ATPase family, AAA domain containing 2	Nucleus	enzyme
-1,328	ATF4		ATF4	activating transcription factor 4	Nucleus	transcription regulator
1,254	ATP1B1		ATP1B1	ATPase, Na+/K+ transporting, beta 1 polypeptide	Plasma Membrane	transporter
-1,963	ATP5EP2		ATP5EP2	ATP synthase, H+ transporting, mitochondrial F1 complex, epsilon subunit pseudogene 2	Cytoplasm	other
-1,254	ATP6V0C		ATP6V0C	ATPase, H+ transporting, lysosomal 16kDa, V0 subunit c	Cytoplasm	transporter
1,468	ATP6V1G2-DDX39B		ATP6V1G2-DDX39B	ATP6V1G2-DDX39B readthrough (NMD candidate)	Other	other
2,236	ATXN1L		ATXN1L	ataxin 1-like	Nucleus	other
1,748	AURKA		AURKA	aurora kinase A	Nucleus	kinase	tozasertib, MLN8054, danusertib
-1,293	AURKAIP1		AURKAIP1	aurora kinase A interacting protein 1	Nucleus	enzyme
1,692	AURKB		AURKB	aurora kinase B	Nucleus	kinase	barasertib, tozasertib, danusertib, GSK1070916
1,283	AZIN1		AZIN1	antizyme inhibitor 1	Cytoplasm	enzyme
1,690	B3GNT3		B3GNT3	UDP-GlcNAc:betaGal beta-1,3-N-acetylglucosaminyltransferase 3	Cytoplasm	enzyme
-1,378	BAG3		BAG3	BCL2-associated athanogene 3	Cytoplasm	other
-1,237	BAG6		BAG6	BCL2-associated athanogene 6	Nucleus	enzyme
-1,509	BAK1		BAK1	BCL2-antagonist/killer 1	Cytoplasm	other
-1,336	BHLHE40		BHLHE40	basic helix-loop-helix family, member e40	Nucleus	transcription regulator
1,756	BIRC5		BIRC5	baculoviral IAP repeat containing 5	Cytoplasm	other
1,357	BMP4		BMP4	bone morphogenetic protein 4	Extracellular Space	growth factor
-1,312	BRD2		BRD2	bromodomain containing 2	Nucleus	kinase
-1,272	BRI3		BRI3	brain protein I3	Other	other
-1,218	BSG		BSG	basigin (Ok blood group)	Plasma Membrane	transporter
2,326	BUB1		BUB1	BUB1 mitotic checkpoint serine/threonine kinase	Nucleus	kinase
2,448	BUB1B		BUB1B	BUB1 mitotic checkpoint serine/threonine kinase B	Nucleus	kinase
-1,355	BUD31		BUD31	BUD31 homolog (S. cerevisiae)	Nucleus	transcription regulator
1,157	BZW1		BZW1	basic leucine zipper and W2 domains 1	Cytoplasm	translation regulator
-1,358	C12orf57		C12orf57	chromosome 12 open reading frame 57	Other	other
-1,296	C19orf53		C19orf53	chromosome 19 open reading frame 53	Other	other
1,239	C4orf3		C4orf3	chromosome 4 open reading frame 3	Other	other
-1,221	C6orf62		C6orf62	chromosome 6 open reading frame 62	Other	other
1,335	CALM2		CALM1 (includes others)	calmodulin 1 (phosphorylase kinase, delta)	Cytoplasm	other
-1,140	CALR		CALR	calreticulin	Cytoplasm	transcription regulator
-1,227	CAMLG		CAMLG	calcium modulating ligand	Cytoplasm	other	alemtuzumab/cyclosporin A, cyclosporine A/tacrolimus, cyclosporine A/sirolimus/tacrolimus, cyclosporin A
1,281	CBX3		CBX3	chromobox homolog 3	Nucleus	transcription regulator
-1,412	CBX4		CBX4	chromobox homolog 4	Nucleus	transcription regulator
-1,400	CCDC9		CCDC9	coiled-coil domain containing 9	Extracellular Space	other
-1,646	CCL26		CCL26	chemokine (C-C motif) ligand 26	Extracellular Space	cytokine
2,110	CCNA2		CCNA2	cyclin A2	Nucleus	other
1,765	CCNB1		CCNB1	cyclin B1	Cytoplasm	kinase
1,974	CCNB2		CCNB2	cyclin B2	Cytoplasm	other
1,161	CCNG1		CCNG1	cyclin G1	Nucleus	other
1,136	CCT8		CCT8	chaperonin containing TCP1, subunit 8 (theta)	Cytoplasm	enzyme
1,203	CD46		CD46	CD46 molecule, complement regulatory protein	Plasma Membrane	other
1,649	CDC20		CDC20	cell division cycle 20	Nucleus	other
2,385	CDC25C		CDC25C	cell division cycle 25C	Nucleus	phosphatase
1,814	CDC6		CDC6	cell division cycle 6	Nucleus	other
2,104	CDCA2		CDCA2	cell division cycle associated 2	Nucleus	other
1,975	CDCA8		CDCA8	cell division cycle associated 8	Nucleus	other
1,212	CDH1		CDH1	cadherin 1, type 1, E-cadherin (epithelial)	Plasma Membrane	other
1,248	CDH17		CDH17	cadherin 17, LI cadherin (liver-intestine)	Plasma Membrane	transporter
1,943	CDK1		CDK1	cyclin-dependent kinase 1	Nucleus	kinase	alvocidib
-1,329	CDK11B		CDK11B	cyclin-dependent kinase 11B	Nucleus	kinase
-1,631	CDK2AP2		CDK2AP2	cyclin-dependent kinase 2 associated protein 2	Nucleus	other
-1,586	CDKN1A		CDKN1A	cyclin-dependent kinase inhibitor 1A (p21, Cip1)	Nucleus	kinase
-1,489	CDKN1C		CDKN1C	cyclin-dependent kinase inhibitor 1C (p57, Kip2)	Nucleus	other
-1,479	CEBPB		CEBPB	CCAAT/enhancer binding protein (C/EBP), beta	Nucleus	transcription regulator
1,265	CEBPZ		CEBPZ	CCAAT/enhancer binding protein (C/EBP), zeta	Nucleus	other
2,430	CENPA		CENPA	centromere protein A	Nucleus	other
2,982	CENPF		CENPF	centromere protein F, 350/400kDa	Nucleus	other
2,326	CEP55		CEP55	centrosomal protein 55kDa	Cytoplasm	other
-1,733	CHAC1		CHAC1	ChaC glutathione-specific gamma-glutamylcyclotransferase 1	Cytoplasm	other
-1,270	CHCHD2		CHCHD2	coiled-coil-helix-coiled-coil-helix domain containing 2	Cytoplasm	other
-1,280	CHMP2A		CHMP2A	charged multivesicular body protein 2A	Cytoplasm	other
-1,249	CHPF		CHPF	chondroitin polymerizing factor	Cytoplasm	enzyme
-1,162	CIB1		CIB1	calcium and integrin binding 1 (calmyrin)	Nucleus	other
1,863	CKAP2		CKAP2	cytoskeleton associated protein 2	Cytoplasm	other
1,779	CKAP5		CKAP5	cytoskeleton associated protein 5	Nucleus	transcription regulator
2,926	CLDN2		CLDN2	claudin 2	Plasma Membrane	other
-1,439	CLDN4		CLDN4	claudin 4	Plasma Membrane	transmembrane receptor
-1,161	CLDN7		CLDN7	claudin 7	Plasma Membrane	other
1,203	CMAS		CMAS	cytidine monophosphate N-acetylneuraminic acid synthetase	Nucleus	enzyme
1,320	CNN3		CNN3	calponin 3, acidic	Cytoplasm	other
-1,249	COPE		COPE	coatomer protein complex, subunit epsilon	Cytoplasm	transporter
1,340	COPZ1		COPZ1	coatomer protein complex, subunit zeta 1	Cytoplasm	transporter
1,340	COPZ1		COPZ1	coatomer protein complex, subunit zeta 1	Cytoplasm	transporter
-1,339	CORO1B		CORO1B	coronin, actin binding protein, 1B	Cytoplasm	other
-1,209	COX6A1		COX6A1	cytochrome c oxidase subunit VIa polypeptide 1	Cytoplasm	enzyme
1,313	CPOX		CPOX	coproporphyrinogen oxidase	Cytoplasm	enzyme
-1,351	CRKL		CRKL	v-crk avian sarcoma virus CT10 oncogene homolog-like	Cytoplasm	kinase
1,421	CSE1L		CSE1L	CSE1 chromosome segregation 1-like (yeast)	Nucleus	transporter
-1,674	CSRNP1		CSRNP1	cysteine-serine-rich nuclear protein 1	Nucleus	transcription regulator
1,493	CST7		CST7	cystatin F (leukocystatin)	Extracellular Space	other
1,583	CTDSPL		CTDSPL	CTD (carboxy-terminal domain, RNA polymerase II, polypeptide A) small phosphatase-like	Nucleus	other
1,344	CTNNAL1		CTNNAL1	catenin (cadherin-associated protein), alpha-like 1	Plasma Membrane	other
-1,194	CTSD		CTSD	cathepsin D	Cytoplasm	peptidase
-1,266	CUTA		CUTA	cutA divalent cation tolerance homolog (E. coli)	Cytoplasm	other
-1,620	IL8		CXCL8	chemokine (C-X-C motif) ligand 8	Extracellular Space	cytokine
1,270	CYR61		CYR61	cysteine-rich, angiogenic inducer, 61	Extracellular Space	other
-1,364	CYSTM1		CYSTM1	cysteine-rich transmembrane module containing 1	Cytoplasm	other
-1,293	DAPK3		DAPK3	death-associated protein kinase 3	Cytoplasm	kinase
1,276	DARS		DARS	aspartyl-tRNA synthetase	Cytoplasm	enzyme
-1,605	DDIT3		DDIT3	DNA-damage-inducible transcript 3	Nucleus	transcription regulator
-1,253	DDX39B		DDX39B	DEAD (Asp-Glu-Ala-Asp) box polypeptide 39B	Nucleus	enzyme
-1,354	DEDD2		DEDD2	death effector domain containing 2	Nucleus	other
2,659	DEPDC1		DEPDC1	DEP domain containing 1	Nucleus	transcription regulator
-1,271	DGAT1		DGAT1	diacylglycerol O-acyltransferase 1	Cytoplasm	enzyme	omacor
-1,501	DHCR7		DHCR7	7-dehydrocholesterol reductase	Cytoplasm	enzyme
-1,327	DHPS		DHPS	deoxyhypusine synthase	Cytoplasm	enzyme
2,139	DLGAP5		DLGAP5	discs, large (Drosophila) homolog-associated protein 5	Nucleus	phosphatase
-1,629	DNAJB2		DNAJB2	DnaJ (Hsp40) homolog, subfamily B, member 2	Nucleus	other
-1,384	DNASE2		DNASE2	deoxyribonuclease II, lysosomal	Cytoplasm	enzyme
-1,546	DUSP1		DUSP1	dual specificity phosphatase 1	Nucleus	phosphatase
1,104	DUSP5		DUSP5	dual specificity phosphatase 5	Nucleus	phosphatase
1,312	DUSP6		DUSP6	dual specificity phosphatase 6	Cytoplasm	phosphatase
-1,595	DOM3Z		DXO	decapping exoribonuclease	Other	enzyme
1,411	ECT2		ECT2	epithelial cell transforming 2	Cytoplasm	other
-1,274	EDF1		EDF1	endothelial differentiation-related factor 1	Nucleus	transcription regulator
1,032	EEF1A1		EEF1A1	eukaryotic translation elongation factor 1 alpha 1	Cytoplasm	translation regulator
1,129	EEF1A1P5		EEF1A1P5	eukaryotic translation elongation factor 1 alpha 1 pseudogene 5	Other	other
3,921	EEF1A1P6		EEF1A1P6	eukaryotic translation elongation factor 1 alpha 1 pseudogene 6	Other	other
-1,248	EEF1G		EEF1G	eukaryotic translation elongation factor 1 gamma	Cytoplasm	translation regulator
-1,189	EEF2		EEF2	eukaryotic translation elongation factor 2	Cytoplasm	translation regulator
-1,433	EGR1		EGR1	early growth response 1	Nucleus	transcription regulator
1,505	EI24		EI24	etoposide induced 2.4	Other	other
-1,118	EIF1		EIF1	eukaryotic translation initiation factor 1	Nucleus	other
1,314	EIF4A1		EIF4A1	eukaryotic translation initiation factor 4A1	Cytoplasm	translation regulator
1,257	EIF4G2		EIF4G2	eukaryotic translation initiation factor 4 gamma, 2	Cytoplasm	translation regulator
-1,236	EIF5A		EIF5A	eukaryotic translation initiation factor 5A	Cytoplasm	translation regulator
-1,534	ELF3		ELF3	E74-like factor 3 (ets domain transcription factor, epithelial-specific )	Nucleus	transcription regulator
1,396	ENC1		ENC1	ectodermal-neural cortex 1 (with BTB domain)	Nucleus	peptidase
1,157	ENO1		ENO1	enolase 1, (alpha)	Cytoplasm	enzyme
1,134	EPCAM		EPCAM	epithelial cell adhesion molecule	Plasma Membrane	other	tucotuzumab celmoleukin, catumaxomab, adecatumumab
1,248	ERO1L		ERO1L	ERO1-like (S. cerevisiae)	Cytoplasm	enzyme
1,275	ERRFI1		ERRFI1	ERBB receptor feedback inhibitor 1	Cytoplasm	other
1,769	F3		F3	coagulation factor III (thromboplastin, tissue factor)	Plasma Membrane	transmembrane receptor	activated recombinant human factor VII
2,552	FAM72D		FAM72C/FAM72D	family with sequence similarity 72, member D	Nucleus	other
2,158	FAM83D		FAM83D	family with sequence similarity 83, member D	Other	other
-1,293	FAM96B		FAM96B	family with sequence similarity 96, member B	Cytoplasm	other
-1,520	FASN		FASN	fatty acid synthase	Cytoplasm	enzyme	orlistat, cerulenin
1,411	FAT1		FAT1	FAT atypical cadherin 1	Plasma Membrane	other
-1,255	FAU		FAU	Finkel-Biskis-Reilly murine sarcoma virus (FBR-MuSV) ubiquitously expressed	Cytoplasm	other
-1,132	FDFT1		FDFT1	farnesyl-diphosphate farnesyltransferase 1	Cytoplasm	enzyme	lapaquistat, zoledronic acid
-1,186	FDPS		FDPS	farnesyl diphosphate synthase	Cytoplasm	enzyme	alendronate/cholecalciferol, zoledronic acid, minodronate, ibandronic acid, risedronic acid, alendronic acid, pamidronic acid
-1,233	FLNA		FLNA	filamin A, alpha	Cytoplasm	other
1,159	FLNB		FLNB	filamin B, beta	Cytoplasm	other
1,386	FOPNL		FOPNL	FGFR1OP N-terminal like	Cytoplasm	other
-1,408	FOS		FOS	FBJ murine osteosarcoma viral oncogene homolog	Nucleus	transcription regulator
-1,472	FOXO3		FOXO3	forkhead box O3	Nucleus	transcription regulator
1,379	FOXQ1		FOXQ1	forkhead box Q1	Nucleus	transcription regulator
-1,389	FSCN1		FSCN1	fascin actin-bundling protein 1	Cytoplasm	other
-1,427	FTH1		FTH1	ferritin, heavy polypeptide 1	Cytoplasm	enzyme
1,239	FUCA1		FUCA1	fucosidase, alpha-L- 1, tissue	Cytoplasm	enzyme
-1,358	GADD45B		GADD45B	growth arrest and DNA-damage-inducible, beta	Cytoplasm	other
1,599	GANAB		GANAB	glucosidase, alpha; neutral AB	Cytoplasm	enzyme	miglitol
1,357	GBP3		GBP3	guanylate binding protein 3	Other	enzyme
1,340	GDA		GDA	guanine deaminase	Cytoplasm	enzyme
-1,540	GDF15		GDF15	growth differentiation factor 15	Extracellular Space	growth factor
1,419	GJB2		GJB2	gap junction protein, beta 2, 26kDa	Plasma Membrane	transporter
-1,665	GJB3		GJB3	gap junction protein, beta 3, 31kDa	Plasma Membrane	transporter
-1,178	GNAI3		GNAI3	guanine nucleotide binding protein (G protein), alpha inhibiting activity polypeptide 3	Cytoplasm	enzyme
-1,335	GNB2		GNB2	guanine nucleotide binding protein (G protein), beta polypeptide 2	Plasma Membrane	enzyme
1,266	GOLGA5		GOLGA5	golgin A5	Cytoplasm	kinase
1,104	GPRC5A		GPRC5A	G protein-coupled receptor, class C, group 5, member A	Plasma Membrane	G-protein coupled receptor
2,051	GPSM2		GPSM2	G-protein signaling modulator 2	Nucleus	other
-1,242	GPX4		GPX4	glutathione peroxidase 4	Cytoplasm	enzyme
-1,382	GTF2F1		GTF2F1	general transcription factor IIF, polypeptide 1, 74kDa	Nucleus	transcription regulator
-1,473	GUK1		GUK1	guanylate kinase 1	Cytoplasm	kinase
-1,263	H19		H19	H19, imprinted maternally expressed transcript (non-protein coding)	Cytoplasm	other
-1,243	H1F0		H1F0	H1 histone family, member 0	Nucleus	other
-1,444	H1FX		H1FX	H1 histone family, member X	Nucleus	other
1,430	HDDC2		HDDC2	HD domain containing 2	Cytoplasm	other
1,222	HDGF		HDGF	hepatoma-derived growth factor	Extracellular Space	growth factor
-1,379	HERPUD1		HERPUD1	homocysteine-inducible, endoplasmic reticulum stress-inducible, ubiquitin-like domain member 1	Cytoplasm	other
-1,519	HES1		HES1	hes family bHLH transcription factor 1	Nucleus	transcription regulator
-2,132	HES4		HES4	hes family bHLH transcription factor 4	Other	other
-1,213	HIGD2A		HIGD2A	HIG1 hypoxia inducible domain family, member 2A	Cytoplasm	other
-1,411	HIST1H1C		HIST1H1C	histone cluster 1, H1c	Nucleus	other
3,820	HIST2H2AB		HIST2H2AB	histone cluster 2, H2ab	Nucleus	other
1,815	HJURP		HJURP	Holliday junction recognition protein	Nucleus	other
-1,180	HMGA1		HMGA1	high mobility group AT-hook 1	Nucleus	transcription regulator
1,378	HMGB1		HMGB1	high mobility group box 1	Nucleus	transcription regulator
1,457	HMGB2		HMGB2	high mobility group box 2	Nucleus	transcription regulator
-1,314	HMGCS1		HMGCS1	3-hydroxy-3-methylglutaryl-CoA synthase 1 (soluble)	Cytoplasm	enzyme
2,580	HMMR		HMMR	hyaluronan-mediated motility receptor (RHAMM)	Plasma Membrane	transmembrane receptor
1,294	HNRNPA1		HNRNPA1	heterogeneous nuclear ribonucleoprotein A1	Nucleus	other
1,294	HNRNPA1		HNRNPA1	heterogeneous nuclear ribonucleoprotein A1	Nucleus	other
4,489	HNRNPA1P10		HNRNPA1P10	heterogeneous nuclear ribonucleoprotein A1 pseudogene 10	Other	other
1,204	HNRNPA2B1		HNRNPA2B1	heterogeneous nuclear ribonucleoprotein A2/B1	Nucleus	other
1,155	HNRNPK		HNRNPK	heterogeneous nuclear ribonucleoprotein K	Nucleus	other
1,382	HNRNPUL2		HNRNPUL2	heterogeneous nuclear ribonucleoprotein U-like 2	Nucleus	other
-1,507	HOTAIRM1		HOTAIRM1	HOXA transcript antisense RNA, myeloid-specific 1	Other	other
-3,169	HOXA5		HOXA5	homeobox A5	Nucleus	transcription regulator
1,330	HPRT1		HPRT1	hypoxanthine phosphoribosyltransferase 1	Cytoplasm	enzyme	6-mercaptopurine, thioguanine, azathioprine, 6-mercaptopurine/methotrexate/prednisone/vincristine, cyclophosphamide/cytarabine/6-mercaptopurine
1,112	HSP90AA1		HSP90AA1	heat shock protein 90kDa alpha (cytosolic), class A member 1	Cytoplasm	enzyme	alvespimycin, retaspimycin, luminespib, cisplatin
-1,144	HSP90B1		HSP90B1	heat shock protein 90kDa beta (Grp94), member 1	Cytoplasm	other	alvespimycin, retaspimycin, cisplatin
-1,241	HSPA1B		HSPA1A/HSPA1B	heat shock 70kDa protein 1A	Cytoplasm	enzyme
1,066	HSPA8		HSPA8	heat shock 70kDa protein 8	Cytoplasm	enzyme
1,110	HSPD1		HSPD1	heat shock 60kDa protein 1 (chaperonin)	Cytoplasm	enzyme
-1,261	ID2		ID2	inhibitor of DNA binding 2, dominant negative helix-loop-helix protein	Nucleus	transcription regulator
-1,292	IER2		IER2	immediate early response 2	Cytoplasm	other
-1,114	IER3		IER3	immediate early response 3	Cytoplasm	other
1,201	IGFBP4		IGFBP4	insulin-like growth factor binding protein 4	Extracellular Space	other
-1,907	IGFL1		IGFL1	IGF-like family member 1	Extracellular Space	other
-1,998	IL32		IL32	interleukin 32	Extracellular Space	cytokine
-1,284	INSIG1		INSIG1	insulin induced gene 1	Cytoplasm	other
-1,726	IRF7		IRF7	interferon regulatory factor 7	Nucleus	transcription regulator
1,510	IRS1		IRS1	insulin receptor substrate 1	Cytoplasm	enzyme
-2,260	ISG15		ISG15	ISG15 ubiquitin-like modifier	Extracellular Space	other
1,313	ITGA6		ITGA6	integrin, alpha 6	Plasma Membrane	transmembrane receptor
1,212	ITM2B		ITM2B	integral membrane protein 2B	Plasma Membrane	other
-1,653	JUN		JUN	jun proto-oncogene	Nucleus	transcription regulator
-1,335	JUND		JUND	jun D proto-oncogene	Nucleus	transcription regulator
-1,236	JUP		JUP	junction plakoglobin	Plasma Membrane	other
-1,116	KDELR1		KDELR1	KDEL (Lys-Asp-Glu-Leu) endoplasmic reticulum protein retention receptor 1	Cytoplasm	transporter
2,106	KIF11		KIF11	kinesin family member 11	Nucleus	other
2,244	KIF20A		KIF20A	kinesin family member 20A	Cytoplasm	transporter
2,022	KIF20B		KIF20B	kinesin family member 20B	Nucleus	enzyme
2,261	KIF2C		KIF2C	kinesin family member 2C	Nucleus	other
2,302	KIF4A		KIF4A	kinesin family member 4A	Nucleus	other
1,536	KIFC1		KIFC1	kinesin family member C1	Nucleus	enzyme
1,880	KIT		KIT	v-kit Hardy-Zuckerman 4 feline sarcoma viral oncogene homolog	Plasma Membrane	transmembrane receptor	dasatinib, sunitinib, pazopanib, tivozanib, motesanib, OSI-930, telatinib, tandutinib, cabozantinib, regorafenib, ponatinib, bortezomib/sorafenib, lapatinib/pazopanib, dexamethasone/lenalidomide/sorafenib, bevacizumab/sorafenib, imatinib/sirolimus, cabozantinib/erlotinib, imatinib/nilotinib/pegintron, imatinib, sorafenib
-1,347	KLF6		KLF6	Kruppel-like factor 6	Nucleus	transcription regulator
2,137	KNSTRN		KNSTRN	kinetochore-localized astrin/SPAG5 binding protein	Cytoplasm	other
1,733	KPNA2		KPNA2	karyopherin alpha 2 (RAG cohort 1, importin alpha 1)	Nucleus	transporter
-1,463	KRT10		KRT10	keratin 10, type I	Cytoplasm	other
-1,158	KRT19		KRT19	keratin 19, type I	Cytoplasm	other
-1,181	KRT8		KRT8	keratin 8, type II	Cytoplasm	other
1,419	KRTAP2-3		KRTAP2-3/KRTAP2-4	keratin associated protein 2-3	Other	other
3,836	KRTAP3-1		KRTAP3-1	keratin associated protein 3-1	Other	other
-1,361	LAMB3		LAMB3	laminin, beta 3	Extracellular Space	transporter
-1,148	LAPTM4A		LAPTM4A	lysosomal protein transmembrane 4 alpha	Cytoplasm	other
1,256	LDHA		LDHA	lactate dehydrogenase A	Cytoplasm	enzyme
1,134	LDHB		LDHB	lactate dehydrogenase B	Cytoplasm	enzyme
-1,301	LENG8		LENG8	leukocyte receptor cluster (LRC) member 8	Other	other
-1,196	LGALS1		LGALS1	lectin, galactoside-binding, soluble, 1	Extracellular Space	other
1,186	LGALS3		LGALS3	lectin, galactoside-binding, soluble, 3	Extracellular Space	other
-1,299	LINC00493		LINC00493	long intergenic non-protein coding RNA 493	Other	other
-1,349	LMF2		LMF2	lipase maturation factor 2	Other	other
1,757	LMNB1		LMNB1	lamin B1	Nucleus	other
3,921	LRRC37BP1		LRRC37BP1	leucine rich repeat containing 37B pseudogene 1	Other	other
-1,467	LRRC8A		LRRC8A	leucine rich repeat containing 8 family, member A	Extracellular Space	other
-1,313	LYPLA2		LYPLA2	lysophospholipase II	Cytoplasm	enzyme
1,750	MAD2L1		MAD2L1	MAD2 mitotic arrest deficient-like 1 (yeast)	Nucleus	other
-1,436	MAFG		MAFG	v-maf avian musculoaponeurotic fibrosarcoma oncogene homolog G	Nucleus	transcription regulator
-1,432	MAFK		MAFK	v-maf avian musculoaponeurotic fibrosarcoma oncogene homolog K	Nucleus	transcription regulator
1,257	MAL2		MAL2	mal, T-cell differentiation protein 2 (gene/pseudogene)	Plasma Membrane	transporter
-1,309	MALAT1		MALAT1	metastasis associated lung adenocarcinoma transcript 1 (non-protein coding)	Nucleus	other
1,452	MALL		MALL	mal, T-cell differentiation protein-like	Plasma Membrane	other
-1,311	MAP1LC3B		MAP1LC3B	microtubule-associated protein 1 light chain 3 beta	Cytoplasm	other
-7,737	MB		MB	myoglobin	Cytoplasm	transporter
-1,318	MED10		MED10	mediator complex subunit 10	Nucleus	other
1,719	MELK		MELK	maternal embryonic leucine zipper kinase	Cytoplasm	kinase
1,589	MET		MET	MET proto-oncogene, receptor tyrosine kinase	Plasma Membrane	kinase	crizotinib, tivantinib, cabozantinib, INC280, cabozantinib/erlotinib
-1,278	MFSD10		MFSD10	major facilitator superfamily domain containing 10	Other	transporter
1,265	MGAT5		MGAT5	mannosyl (alpha-1,6-)-glycoprotein beta-1,6-N-acetyl-glucosaminyltransferase	Cytoplasm	enzyme
-1,353	MICA		MICA	MHC class I polypeptide-related sequence A	Plasma Membrane	other
-1,342	MID1IP1		MID1IP1	MID1 interacting protein 1	Cytoplasm	other
-1,277	MIDN		MIDN	midnolin	Nucleus	other
-1,478	MIEN1		MIEN1	migration and invasion enhancer 1	Cytoplasm	other
-1,113	MIF		MIF	macrophage migration inhibitory factor (glycosylation-inhibiting factor)	Extracellular Space	cytokine
-1,787	MIR22HG		MIR22HG	MIR22 host gene (non-protein coding)	Other	other
2,697	MIR3654		MIR3654	microRNA 3654	Cytoplasm	microRNA
2,209	MKI67		MKI67	marker of proliferation Ki-67	Nucleus	other
-1,273	MKNK2		MKNK2	MAP kinase interacting serine/threonine kinase 2	Cytoplasm	kinase
1,291	MRFAP1		MRFAP1	Morf4 family associated protein 1	Nucleus	other
-1,308	MRPL18		MRPL18	mitochondrial ribosomal protein L18	Cytoplasm	translation regulator
-1,417	MRPL41		MRPL41	mitochondrial ribosomal protein L41	Cytoplasm	other
-1,437	MRPL55		MRPL55	mitochondrial ribosomal protein L55	Cytoplasm	other
-1,320	MRPS34		MRPS34	mitochondrial ribosomal protein S34	Cytoplasm	other
-1,225	MSMO1		MSMO1	methylsterol monooxygenase 1	Cytoplasm	enzyme
1,061	MT-ATP6		MT-ATP6	ATP synthase F0 subunit 6	Cytoplasm	transporter
1,049	MT-CO1		MT-CO1	cytochrome c oxidase subunit I	Cytoplasm	enzyme
1,152	MT-CO2		MT-CO2	cytochrome c oxidase subunit II	Cytoplasm	enzyme
1,076	MT-CO3		MT-CO3	cytochrome c oxidase III	Cytoplasm	enzyme
1,083	MT-CYB		MT-CYB	cytochrome b	Cytoplasm	enzyme	atovaquone, atovaquone/proguanil
-1,050	MT-ND1		MT-ND1	NADH dehydrogenase, subunit 1 (complex I)	Cytoplasm	enzyme
1,117	MT-ND2		MT-ND2	MTND2	Cytoplasm	enzyme
-1,060	MT-ND3		MT-ND3	NADH dehydrogenase, subunit 3 (complex I)	Cytoplasm	enzyme
1,053	MT-ND4		MT-ND4	NADH dehydrogenase, subunit 4 (complex I)	Cytoplasm	enzyme
1,083	MT-ND4L		MT-ND4L	NADH dehydrogenase, subunit 4L (complex I)	Cytoplasm	enzyme
1,117	MT-ND5		MT-ND5	NADH dehydrogenase, subunit 5 (complex I)	Cytoplasm	enzyme
-2,280	MT1X		MT1X	metallothionein 1X	Other	other
-1,219	MT2A		MT2A	metallothionein 2A	Cytoplasm	other
-1,672	MVD		MVD	mevalonate (diphospho) decarboxylase	Cytoplasm	enzyme
-1,403	MXD1		MXD1	MAX dimerization protein 1	Nucleus	transcription regulator
-1,207	C19orf10		MYDGF	myeloid-derived growth factor	Extracellular Space	cytokine
-1,207	C19orf10		MYDGF	myeloid-derived growth factor	Extracellular Space	cytokine
1,130	MYL12A		MYL12A	myosin, light chain 12A, regulatory, non-sarcomeric	Cytoplasm	other
1,152	MYL12B		MYL12B	myosin, light chain 12B, regulatory	Cytoplasm	other
1,211	NAP1L1		NAP1L1	nucleosome assembly protein 1-like 1	Nucleus	other
1,474	NCAPD2		NCAPD2	non-SMC condensin I complex, subunit D2	Nucleus	other
1,790	NCAPG		NCAPG	non-SMC condensin I complex, subunit G	Nucleus	other
2,222	NCAPH		NCAPH	non-SMC condensin I complex, subunit H	Nucleus	other
1,197	NCL		NCL	nucleolin	Nucleus	other
2,292	NDC80		NDC80	NDC80 kinetochore complex component	Nucleus	other
1,200	NDRG1		NDRG1	N-myc downstream regulated 1	Nucleus	kinase
3,117	NEDD8-MDP1		NEDD8-MDP1	NEDD8-MDP1 readthrough	Other	other
2,289	NEK2		NEK2	NIMA-related kinase 2	Cytoplasm	kinase
-1,301	NELFE		NELFE	negative elongation factor complex member E	Nucleus	other
-1,581	NEU1		NEU1	sialidase 1 (lysosomal sialidase)	Cytoplasm	enzyme
1,594	NFE2L3		NFE2L3	nuclear factor, erythroid 2-like 3	Nucleus	transcription regulator
-1,388	NFKBIA		NFKBIA	nuclear factor of kappa light polypeptide gene enhancer in B-cells inhibitor, alpha	Cytoplasm	transcription regulator
-1,403	NHP2		NHP2	NHP2 ribonucleoprotein	Nucleus	other
1,110	NQO1		NQO1	NAD(P)H dehydrogenase, quinone 1	Cytoplasm	enzyme
-1,449	NR1D1		NR1D1	nuclear receptor subfamily 1, group D, member 1	Nucleus	ligand-dependent nuclear receptor
1,399	NT5E		NT5E	5'-nucleotidase, ecto (CD73)	Plasma Membrane	phosphatase
1,269	NUCKS1		NUCKS1	nuclear casein kinase and cyclin-dependent kinase substrate 1	Nucleus	kinase
1,851	NUSAP1		NUSAP1	nucleolar and spindle associated protein 1	Nucleus	other
-1,180	OAZ1		OAZ1	ornithine decarboxylase antizyme 1	Cytoplasm	enzyme
-1,208	ODC1		ODC1	ornithine decarboxylase 1	Cytoplasm	enzyme	tazarotene, eflornithine
2,842	OIP5		OIP5	Opa interacting protein 5	Nucleus	other
1,453	OLFML3		OLFML3	olfactomedin-like 3	Extracellular Space	other
1,531	OLR1		OLR1	oxidized low density lipoprotein (lectin-like) receptor 1	Plasma Membrane	transmembrane receptor
-1,290	C20orf111		OSER1	oxidative stress responsive serine-rich 1	Other	kinase
1,135	P4HA1		P4HA1	prolyl 4-hydroxylase, alpha polypeptide I	Cytoplasm	enzyme
-1,209	P4HB		P4HB	prolyl 4-hydroxylase, beta polypeptide	Cytoplasm	enzyme
1,255	PAICS		PAICS	phosphoribosylaminoimidazole carboxylase, phosphoribosylaminoimidazole succinocarboxamide synthetase	Cytoplasm	enzyme
1,366	PARM1		PARM1	prostate androgen-regulated mucin-like protein 1	Extracellular Space	other
1,712	PBK		PBK	PDZ binding kinase	Cytoplasm	kinase
-1,196	PDIA4		PDIA4	protein disulfide isomerase family A, member 4	Cytoplasm	enzyme
1,210	PERP		PERP	PERP, TP53 apoptosis effector	Plasma Membrane	other
-1,208	PFDN2		PFDN2	prefoldin subunit 2	Cytoplasm	other
1,455	PFN2		PFN2	profilin 2	Cytoplasm	other
1,141	PGAM1		PGAM1	phosphoglycerate mutase 1 (brain)	Cytoplasm	phosphatase
-1,628	PGAM5		PGAM5	phosphoglycerate mutase family member 5	Cytoplasm	enzyme
1,350	PGK1		PGK1	phosphoglycerate kinase 1	Cytoplasm	kinase
-1,433	PHF1		PHF1	PHD finger protein 1	Nucleus	transcription regulator
1,189	PHLDA1		PHLDA1	pleckstrin homology-like domain, family A, member 1	Cytoplasm	other
-1,339	PHLDA2		PHLDA2	pleckstrin homology-like domain, family A, member 2	Cytoplasm	other
-1,333	PHPT1		PHPT1	phosphohistidine phosphatase 1	Cytoplasm	phosphatase
-1,419	PIM3		PIM3	Pim-3 proto-oncogene, serine/threonine kinase	Other	kinase
1,130	PKM		PKM	pyruvate kinase, muscle	Cytoplasm	kinase
1,367	PKP2		PKP2	plakophilin 2	Plasma Membrane	other
-1,649	PLCXD1		PLCXD1	phosphatidylinositol-specific phospholipase C, X domain containing 1	Other	enzyme
-1,372	PNPLA2		PNPLA2	patatin-like phospholipase domain containing 2	Cytoplasm	enzyme
1,286	PNRC2		PNRC2	proline-rich nuclear receptor coactivator 2	Nucleus	other
1,763	POLR3GL		POLR3GL	polymerase (RNA) III (DNA directed) polypeptide G (32kD)-like	Nucleus	other
-1,372	POLRMT		POLRMT	polymerase (RNA) mitochondrial (DNA directed)	Cytoplasm	enzyme
-5,851	PPIAP22		PPIAP22	peptidylprolyl isomerase A (cyclophilin A) pseudogene 22	Other	enzyme
-1,315	PPP1R11		PPP1R11	protein phosphatase 1, regulatory (inhibitor) subunit 11	Cytoplasm	other
-1,483	PPP1R15A		PPP1R15A	protein phosphatase 1, regulatory subunit 15A	Cytoplasm	other
-1,591	PPP1R15B		PPP1R15B	protein phosphatase 1, regulatory subunit 15B	Cytoplasm	phosphatase
1,334	PPT1		PPT1	palmitoyl-protein thioesterase 1	Cytoplasm	enzyme
-1,510	PRAF2		PRAF2	PRA1 domain family, member 2	Other	other
1,682	PRC1		PRC1	protein regulator of cytokinesis 1	Nucleus	other
1,103	PRDX1		PRDX1	peroxiredoxin 1	Cytoplasm	enzyme
-1,241	PRDX5		PRDX5	peroxiredoxin 5	Cytoplasm	enzyme	auranofin
-1,274	PRELID1		PRELID1	PRELI domain containing 1	Cytoplasm	other
-1,209	PRNP		PRNP	prion protein	Plasma Membrane	other
-1,496	PRSS22		PRSS22	protease, serine, 22	Extracellular Space	peptidase
1,435	PRSS23		PRSS23	protease, serine, 23	Extracellular Space	peptidase
-1,260	PRSS8		PRSS8	protease, serine, 8	Extracellular Space	peptidase
-1,115	PSAP		PSAP	prosaposin	Extracellular Space	other
-1,676	PSMA2		PSMA2	proteasome (prosome, macropain) subunit, alpha type, 2	Cytoplasm	peptidase
1,312	PSMA3		PSMA3	proteasome (prosome, macropain) subunit, alpha type, 3	Cytoplasm	peptidase
-1,339	PSMC4		PSMC4	proteasome (prosome, macropain) 26S subunit, ATPase, 4	Nucleus	peptidase
1,200	PSME1		PSME1	proteasome (prosome, macropain) activator subunit 1 (PA28 alpha)	Cytoplasm	other
-1,259	PTBP1		PTBP1	polypyrimidine tract binding protein 1	Nucleus	enzyme
1,221	PTMA		PTMA	prothymosin, alpha	Nucleus	other
1,408	PTMS		PTMS	parathymosin	Nucleus	other
2,077	PTPN13		PTPN13	protein tyrosine phosphatase, non-receptor type 13 (APO-1/CD95 (Fas)-associated phosphatase)	Cytoplasm	phosphatase
1,805	PTTG1		PTTG1	pituitary tumor-transforming 1	Nucleus	transcription regulator
-1,725	PUSL1		PUSL1	pseudouridylate synthase-like 1	Other	enzyme
1,480	QPCT		QPCT	glutaminyl-peptide cyclotransferase	Cytoplasm	enzyme
1,477	QPRT		QPRT	quinolinate phosphoribosyltransferase	Cytoplasm	enzyme	atorvastatin/niacin, nicotinic acid/pioglitazone, nicotinic acid, lovastatin/niacin
1,465	RACGAP1		RACGAP1	Rac GTPase activating protein 1	Cytoplasm	transporter
1,251	RAD21		RAD21	RAD21 homolog (S. pombe)	Nucleus	other
-1,132	RHOA		RHOA	ras homolog family member A	Cytoplasm	enzyme
-1,366	RHOB		RHOB	ras homolog family member B	Cytoplasm	enzyme
1,427	RHOBTB3		RHOBTB3	Rho-related BTB domain containing 3	Cytoplasm	enzyme
-1,462	RMDN3		RMDN3	regulator of microtubule dynamics 3	Cytoplasm	other
-1,352	RNH1		RNH1	ribonuclease/angiogenin inhibitor 1	Cytoplasm	other
-1,218	RPL10		RPL10	ribosomal protein L10	Cytoplasm	other
1,160	RPL11		RPL11	ribosomal protein L11	Cytoplasm	other
-1,080	RPL12		RPL12	ribosomal protein L12	Nucleus	other
-1,098	RPL13A		RPL13A	ribosomal protein L13a	Cytoplasm	other
2,948	RPL13AP5		RPL13AP5	ribosomal protein L13a pseudogene 5	Other	other
1,104	RPL13P12		RPL13P12	ribosomal protein L13 pseudogene 12	Other	other
1,178	RPL17		RPL17	ribosomal protein L17	Cytoplasm	other
-1,160	RPL18		RPL18	ribosomal protein L18	Cytoplasm	other
-1,241	RPL18A		RPL18A	ribosomal protein L18a	Cytoplasm	other
-1,081	RPL29		RPL29	ribosomal protein L29	Cytoplasm	other
-1,105	RPL3		RPL3	ribosomal protein L3	Cytoplasm	other	omacetaxine mepesuccinate
1,121	RPL30		RPL30	ribosomal protein L30	Cytoplasm	other
-1,141	RPL35		RPL35	ribosomal protein L35	Cytoplasm	other
-1,195	RPL36		RPL36	ribosomal protein L36	Cytoplasm	other
1,102	RPL36AL		RPL36AL	ribosomal protein L36a-like	Cytoplasm	other
1,102	RPL36AL		RPL36AL	ribosomal protein L36a-like	Cytoplasm	other
1,207	RPL39		RPL39	ribosomal protein L39	Cytoplasm	other
1,966	RPL39P5		RPL39P5	ribosomal protein L39 pseudogene 5	Other	other
-3,577	RPL6P27		RPL6P27	ribosomal protein L6 pseudogene 27	Other	other
-1,160	RPL8		RPL8	ribosomal protein L8	Other	other
-1,179	RPLP2		RPLP2	ribosomal protein, large, P2	Cytoplasm	other
1,054	RPS12		RPS12	ribosomal protein S12	Cytoplasm	other
-1,091	RPS13		RPS13	ribosomal protein S13	Other	other
1,115	RPS15A		RPS15A	ribosomal protein S15a	Cytoplasm	other
-1,117	RPS16		RPS16	ribosomal protein S16	Cytoplasm	other
1,091	RPS18		RPS18	ribosomal protein S18	Cytoplasm	other
-1,133	RPS2		RPS2	ribosomal protein S2	Cytoplasm	other
1,174	RPS23		RPS23	ribosomal protein S23	Cytoplasm	translation regulator
1,177	RPS24		RPS24	ribosomal protein S24	Cytoplasm	other
1,080	RPS27		RPS27	ribosomal protein S27	Cytoplasm	other
1,135	RPS27A		RPS27A	ribosomal protein S27a	Cytoplasm	other
-1,267	RPS28		RPS28	ribosomal protein S28	Cytoplasm	other
-3,760	RPS2P46		RPS2P46	ribosomal protein S2 pseudogene 46	Other	other
2,177	RPS3AP5		RPS3AP5	ribosomal protein S3A pseudogene 5	Other	other
1,195	RPS4X		RPS4X	ribosomal protein S4, X-linked	Cytoplasm	other
1,056	RPS6		RPS6	ribosomal protein S6	Cytoplasm	other
-1,186	RPS9		RPS9	ribosomal protein S9	Cytoplasm	translation regulator
1,672	RRM2		RRM2	ribonucleotide reductase M2	Nucleus	enzyme	cytarabine/fludarabine phosphate, bortezomib/cladribine/rituximab, gemcitabine/paclitaxel, cyclophosphamide/fludarabine phosphate/rituximab, cladribine/cytarabine/daunorubicin, gemcitabine/oxaliplatin, gemcitabine/vinorelbine, docetaxel/gemcitabine, docetaxel/gemcitabine/vincristine, cladribine/cytarabine/filgrastim, capecitabine/gemcitabine, gemcitabine/oxaliplatin/paclitaxel, cytarabine/filgras…
1,119	S100A11		S100A11	S100 calcium binding protein A11	Cytoplasm	other
-1,089	S100A14		S100A14	S100 calcium binding protein A14	Cytoplasm	other
-1,193	S100A16		S100A16	S100 calcium binding protein A16	Nucleus	other
-1,675	S100P		S100P	S100 calcium binding protein P	Cytoplasm	other
-1,292	SAT2		SAT2	spermidine/spermine N1-acetyltransferase family member 2	Plasma Membrane	enzyme
1,588	SAV1		SAV1	salvador family WW domain containing protein 1	Cytoplasm	other
-1,277	SCAMP3		SCAMP3	secretory carrier membrane protein 3	Cytoplasm	transporter
-1,197	SCD		SCD	stearoyl-CoA desaturase (delta-9-desaturase)	Cytoplasm	enzyme
1,501	SCRN1		SCRN1	secernin 1	Cytoplasm	other
1,189	SDCBP		SDCBP	syndecan binding protein (syntenin)	Plasma Membrane	enzyme
-1,412	SDCBP2		SDCBP2	syndecan binding protein (syntenin) 2	Cytoplasm	other
-1,390	SEMA3B		SEMA3B	sema domain, immunoglobulin domain (Ig), short basic domain, secreted, (semaphorin) 3B	Extracellular Space	other
-1,800	SENP3-EIF4A1		SENP3-EIF4A1	SENP3-EIF4A1 readthrough (NMD candidate)	Other	other
1,262	SEP15		SEP15	15 kDa selenoprotein	Cytoplasm	enzyme
1,238	SEPT10		SEPT10	septin 10	Cytoplasm	transcription regulator
-1,217	SF3B5		SF3B5	splicing factor 3b, subunit 5, 10kDa	Nucleus	other
-1,206	SFN		SFN	stratifin	Cytoplasm	other
2,492	SGOL2		SGOL2	shugoshin-like 2 (S. pombe)	Nucleus	other
1,552	SGPL1		SGPL1	sphingosine-1-phosphate lyase 1	Cytoplasm	enzyme
-1,342	SGTA		SGTA	small glutamine-rich tetratricopeptide repeat (TPR)-containing, alpha	Cytoplasm	other
-1,207	SH3BGRL3		SH3BGRL3	SH3 domain binding glutamate-rich protein like 3	Nucleus	other
-1,353	SH3GL1		SH3GL1	SH3-domain GRB2-like 1	Cytoplasm	other
1,657	SLC12A2		SLC12A2	solute carrier family 12 (sodium/potassium/chloride transporter), member 2	Plasma Membrane	transporter	bumetanide, quinethazone
-1,246	SLC25A1		SLC25A1	solute carrier family 25 (mitochondrial carrier; citrate transporter), member 1	Other	transporter
-1,479	SLC25A22		SLC25A22	solute carrier family 25 (mitochondrial carrier: glutamate), member 22	Cytoplasm	transporter
-1,131	SLC25A6		SLC25A6	solute carrier family 25 (mitochondrial carrier; adenine nucleotide translocator), member 6	Cytoplasm	transporter	clodronic acid
1,850	SLC35A1		SLC35A1	solute carrier family 35 (CMP-sialic acid transporter), member A1	Cytoplasm	transporter
-1,250	SLC3A2		SLC3A2	solute carrier family 3 (amino acid transporter heavy chain), member 2	Plasma Membrane	transporter
1,622	SMC4		SMC4	structural maintenance of chromosomes 4	Nucleus	transporter
-1,186	SNHG8		SNHG8	small nucleolar RNA host gene 8 (non-protein coding)	Other	other
-1,643	SNHG9		SNHG9	small nucleolar RNA host gene 9 (non-protein coding)	Other	other
1,287	SOD1		SOD1	superoxide dismutase 1, soluble	Cytoplasm	enzyme
2,441	SPAG5		SPAG5	sperm associated antigen 5	Nucleus	peptidase
-1,781	SPNS1		SPNS1	spinster homolog 1 (Drosophila)	Cytoplasm	transporter
1,581	SPNS2		SPNS2	spinster homolog 2 (Drosophila)	Other	transporter
-1,665	SPSB3		SPSB3	splA/ryanodine receptor domain and SOCS box containing 3	Other	other
1,345	SPTLC2		SPTLC2	serine palmitoyltransferase, long chain base subunit 2	Cytoplasm	enzyme
-1,651	SQSTM1		SQSTM1	sequestosome 1	Cytoplasm	transcription regulator
-1,504	SREBF1		SREBF1	sterol regulatory element binding transcription factor 1	Nucleus	transcription regulator
1,198	SRP9		SRP9	signal recognition particle 9kDa	Cytoplasm	other
-1,193	SRPR		SRPR	signal recognition particle receptor (docking protein)	Cytoplasm	other
-2,468	SS18L2		SS18L2	synovial sarcoma translocation gene on chromosome 18-like 2	Other	other
1,230	SSFA2		SSFA2	sperm specific antigen 2	Plasma Membrane	other
-1,598	SSSCA1		SSSCA1	Sjogren syndrome/scleroderma autoantigen 1	Other	other
-27,223	ST13P5		ST13P5	suppression of tumorigenicity 13 (colon carcinoma) (Hsp70 interacting protein) pseudogene 5	Cytoplasm	other
1,372	STARD7		STARD7	StAR-related lipid transfer (START) domain containing 7	Other	other
2,037	STMN1		STMN1	stathmin 1	Cytoplasm	other
1,283	STT3B		STT3B	STT3B, subunit of the oligosaccharyltransferase complex (catalytic)	Cytoplasm	enzyme
-2,497	SYS1-DBNDD2		SYS1-DBNDD2	SYS1-DBNDD2 readthrough (NMD candidate)	Other	other
1,681	TACC3		TACC3	transforming, acidic coiled-coil containing protein 3	Nucleus	other
1,246	TACSTD2		TACSTD2	tumor-associated calcium signal transducer 2	Plasma Membrane	other
-1,279	TAF13		TAF13	TAF13 RNA polymerase II, TATA box binding protein (TBP)-associated factor, 18kDa	Nucleus	transcription regulator
1,199	TAX1BP1		TAX1BP1	Tax1 (human T-cell leukemia virus type I) binding protein 1	Cytoplasm	other
1,519	FAM115A		TCAF1	TRPM8 channel-associated factor 1	Plasma Membrane	other
-1,389	TCEB2		TCEB2	transcription elongation factor B (SIII), polypeptide 2 (18kDa, elongin B)	Nucleus	transcription regulator
1,359	TEAD1		TEAD1	TEA domain family member 1 (SV40 transcriptional enhancer factor)	Nucleus	transcription regulator
2,147	TGFB2		TGFB2	transforming growth factor, beta 2	Extracellular Space	growth factor	trabedersen
1,602	THOC7		THOC7	THO complex 7 homolog (Drosophila)	Nucleus	other
-1,453	FXC1		TIMM10B	translocase of inner mitochondrial membrane 10 homolog B (yeast)	Cytoplasm	transporter
-1,243	TKT		TKT	transketolase	Cytoplasm	enzyme
1,117	TM4SF1		TM4SF1	transmembrane 4 L six family member 1	Plasma Membrane	other
-1,306	TMA7		TMA7	translation machinery associated 7 homolog (S. cerevisiae)	Other	other
-3,287	TMED7		TMED7	transmembrane emp24 protein transport domain containing 7	Cytoplasm	transporter
-1,188	TMED9		TMED9	transmembrane emp24 protein transport domain containing 9	Cytoplasm	transporter
-1,481	TMEM120B		TMEM120B	transmembrane protein 120B	Other	other
1,365	TMEM123		TMEM123	transmembrane protein 123	Plasma Membrane	other
-1,334	TMEM208		TMEM208	transmembrane protein 208	Other	other
1,919	TMEM52B		TMEM52B	transmembrane protein 52B	Cytoplasm	other
-1,481	TMEM55B		TMEM55B	transmembrane protein 55B	Cytoplasm	phosphatase
1,049	TMSB10		TMSB10/TMSB4X	thymosin beta 10	Cytoplasm	other
-1,436	TMUB1		TMUB1	transmembrane and ubiquitin-like domain containing 1	Extracellular Space	other
1,350	TNFRSF10D		TNFRSF10D	tumor necrosis factor receptor superfamily, member 10d, decoy with truncated death domain	Plasma Membrane	transmembrane receptor
1,155	TNFRSF21		TNFRSF21	tumor necrosis factor receptor superfamily, member 21	Plasma Membrane	transmembrane receptor
1,327	TNS4		TNS4	tensin 4	Cytoplasm	other
-1,664	TOMM5		TOMM5	translocase of outer mitochondrial membrane 5 homolog (yeast)	Cytoplasm	other
1,279	TOP1		TOP1	topoisomerase (DNA) I	Nucleus	enzyme	elsamitrucin, T 0128, polyglutamate camptothecin, elomotecan, tafluposide, cetuximab/irinotecan, capecitabine/irinotecan, 5-fluorouracil/irinotecan, cisplatin/topotecan, cyclophosphamide/topotecan, cyclophosphamide/topotecan/vincristine, irinotecan/temozolomide, irinotecan/vincristine, cyclophosphamide/irinotecan/temozolomide, irinotecan/temozolomide/vincristine, bevacizumab/irinotecan, bevacizum…
2,041	TOP2A		TOP2A	topoisomerase (DNA) II alpha 170kDa	Nucleus	enzyme	novobiocin, etoposide, teniposide, CPI-0004Na, becatecarin, elsamitrucin, AQ4N, elomotecan, tafluposide, fleroxacin, cyclophosphamide/epirubicin/5-fluorouracil, cytarabine/daunorubicin, hydrocortisone/mitoxantrone, mitoxantrone/prednisone, cladribine/cytarabine/daunorubicin, cytarabine/daunorubicin/tretinoin, cytarabine/idarubicin, idarubicin/mitoxantrone/tretinoin, arsenic trioxide/daunorubicin/…
1,090	TPI1		TPI1	triosephosphate isomerase 1	Cytoplasm	enzyme
1,090	TPI1		TPI1	triosephosphate isomerase 1	Cytoplasm	enzyme
1,465	TPM4		TPM4	tropomyosin 4	Cytoplasm	other
-1,465	TPRG1L		TPRG1L	tumor protein p63 regulated 1-like	Cytoplasm	other
-1,135	TPT1		TPT1	tumor protein, translationally-controlled 1	Cytoplasm	other
1,495	TPX2		TPX2	TPX2, microtubule-associated	Nucleus	other
-1,638	TRMT1		TRMT1	tRNA methyltransferase 1 homolog (S. cerevisiae)	Extracellular Space	enzyme
-1,427	TRMT112		TRMT112	tRNA methyltransferase 11-2 homolog (S. cerevisiae)	Cytoplasm	enzyme
1,320	TSPAN1		TSPAN1	tetraspanin 1	Cytoplasm	transporter
-1,152	TSPAN13		TSPAN13	tetraspanin 13	Plasma Membrane	other
-1,542	TSSC4		TSSC4	tumor suppressing subtransferable candidate 4	Other	other
1,359	TUBA1B		TUBA1B	tubulin, alpha 1b	Cytoplasm	other
1,764	TUBA1C		TUBA1C	tubulin, alpha 1c	Cytoplasm	other	epothilone B, colchicine/probenecid, larotaxel, eribulin, davunetide, vintafolide, milataxel, cevipabulin, gemcitabine/paclitaxel, docetaxel/prednisone, capecitabine/docetaxel, paclitaxel/trastuzumab, cyclophosphamide/prednisone/vincristine, docetaxel/hydrocortisone, cyclophosphamide/docetaxel, gemcitabine/vinorelbine, cyclophosphamide/daunorubicin/imatinib/prednisone/vincristine, cyclophosphamid…
1,133	TUBB4B		TUBB4B	tubulin, beta 4B class IVb	Cytoplasm	other	epothilone B, colchicine/probenecid, larotaxel, ABT-751, eribulin, simotaxel, davunetide, vintafolide, milataxel, cevipabulin, brentuximab vedotin, cabazitaxel, gemcitabine/paclitaxel, docetaxel/prednisone, capecitabine/docetaxel, paclitaxel/trastuzumab, cyclophosphamide/prednisone/vincristine, docetaxel/hydrocortisone, cyclophosphamide/docetaxel, gemcitabine/vinorelbine, cyclophosphamide/daunoru…
-1,636	TUT1		TUT1	terminal uridylyl transferase 1, U6 snRNA-specific	Nucleus	enzyme
1,325	TWSG1		TWSG1	twisted gastrulation BMP signaling modulator 1	Extracellular Space	other
1,588	TYMS		TYMS	thymidylate synthetase	Nucleus	enzyme	flucytosine, 5-fluorouracil, trimethoprim, cyclophosphamide/epirubicin/5-fluorouracil, pralatrexate, 5-fluorouracil/oxaliplatin, capecitabine/irinotecan, 5-fluorouracil/irinotecan, capecitabine/docetaxel, capecitabine/lapatinib, capecitabine/ixabepilone, bevacizumab/5-fluorouracil, bevacizumab/capecitabine/oxaliplatin, cyclophosphamide/docetaxel/epirubicin/5-fluorouracil/trastuzumab, capecitabine…
-1,132	UBB		UBB	ubiquitin B	Cytoplasm	enzyme
-1,103	UBC		UBC	ubiquitin C	Cytoplasm	enzyme
1,695	UBE2C		UBE2C	ubiquitin-conjugating enzyme E2C	Cytoplasm	enzyme
1,298	UBE2E1		UBE2E1	ubiquitin-conjugating enzyme E2E 1	Cytoplasm	enzyme
-1,270	UBE2M		UBE2M	ubiquitin-conjugating enzyme E2M	Cytoplasm	enzyme
1,463	UBE2S		UBE2S	ubiquitin-conjugating enzyme E2S	Nucleus	enzyme
1,782	UBE2T		UBE2T	ubiquitin-conjugating enzyme E2T	Nucleus	enzyme
-1,339	UBXN6		UBXN6	UBX domain protein 6	Cytoplasm	other
-1,727	UCA1		UCA1	urothelial cancer associated 1 (non-protein coding)	Other	other
1,393	UFC1		UFC1	ubiquitin-fold modifier conjugating enzyme 1	Cytoplasm	enzyme
-1,448	ULBP2		ULBP2	UL16 binding protein 2	Plasma Membrane	transmembrane receptor
-1,701	UPP1		UPP1	uridine phosphorylase 1	Cytoplasm	enzyme
-1,313	UQCRQ		UQCRQ	ubiquinol-cytochrome c reductase, complex III subunit VII, 9.5kDa	Cytoplasm	enzyme
1,427	USO1		USO1	USO1 vesicle transport factor	Cytoplasm	transporter
-1,198	VMP1		VMP1	vacuole membrane protein 1	Plasma Membrane	other
-1,422	WDR83OS		WDR83OS	WD repeat domain 83 opposite strand	Other	other
-1,482	XAB2		XAB2	XPA binding protein 2	Nucleus	other
-1,395	YIPF2		YIPF2	Yip1 domain family, member 2	Cytoplasm	other
-1,279	YKT6		YKT6	YKT6 v-SNARE homolog (S. cerevisiae)	Cytoplasm	enzyme
1,090	YWHAE		YWHAE	tyrosine 3-monooxygenase/tryptophan 5-monooxygenase activation protein, epsilon	Cytoplasm	other
1,233	YWHAQ		YWHAQ	tyrosine 3-monooxygenase/tryptophan 5-monooxygenase activation protein, theta	Cytoplasm	other
2,388	ZC3HAV1L		ZC3HAV1L	zinc finger CCCH-type, antiviral 1-like	Other	other
-1,551	ZFP36		ZFP36	ZFP36 ring finger protein	Nucleus	transcription regulator
2,086	ZNF146		ZNF146	zinc finger protein 146	Nucleus	other
-1,521	ZNF598		ZNF598	zinc finger protein 598	Extracellular Space	other
1,977	ZNF761		ZNF761	zinc finger protein 761	Other	other
-1,443	ZSWIM8		ZSWIM8	zinc finger, SWIM-type containing 8	Extracellular Space	other
-1,199	ZYX		ZYX	zyxin	Plasma Membrane	other
